# Supplementary material for: Extreme Wildlife Declines and Concurrent Increase in Livestock Numbers in Kenya: What Are the Causes?
Source: PLOS journal article supplement (doi:10.1371/journal.pone.0163249), 2016-09-27

Total annual rainfall in mm

Narok

1960

1970

1980

1990

2000

2010

Year

1400

1200

1000

800

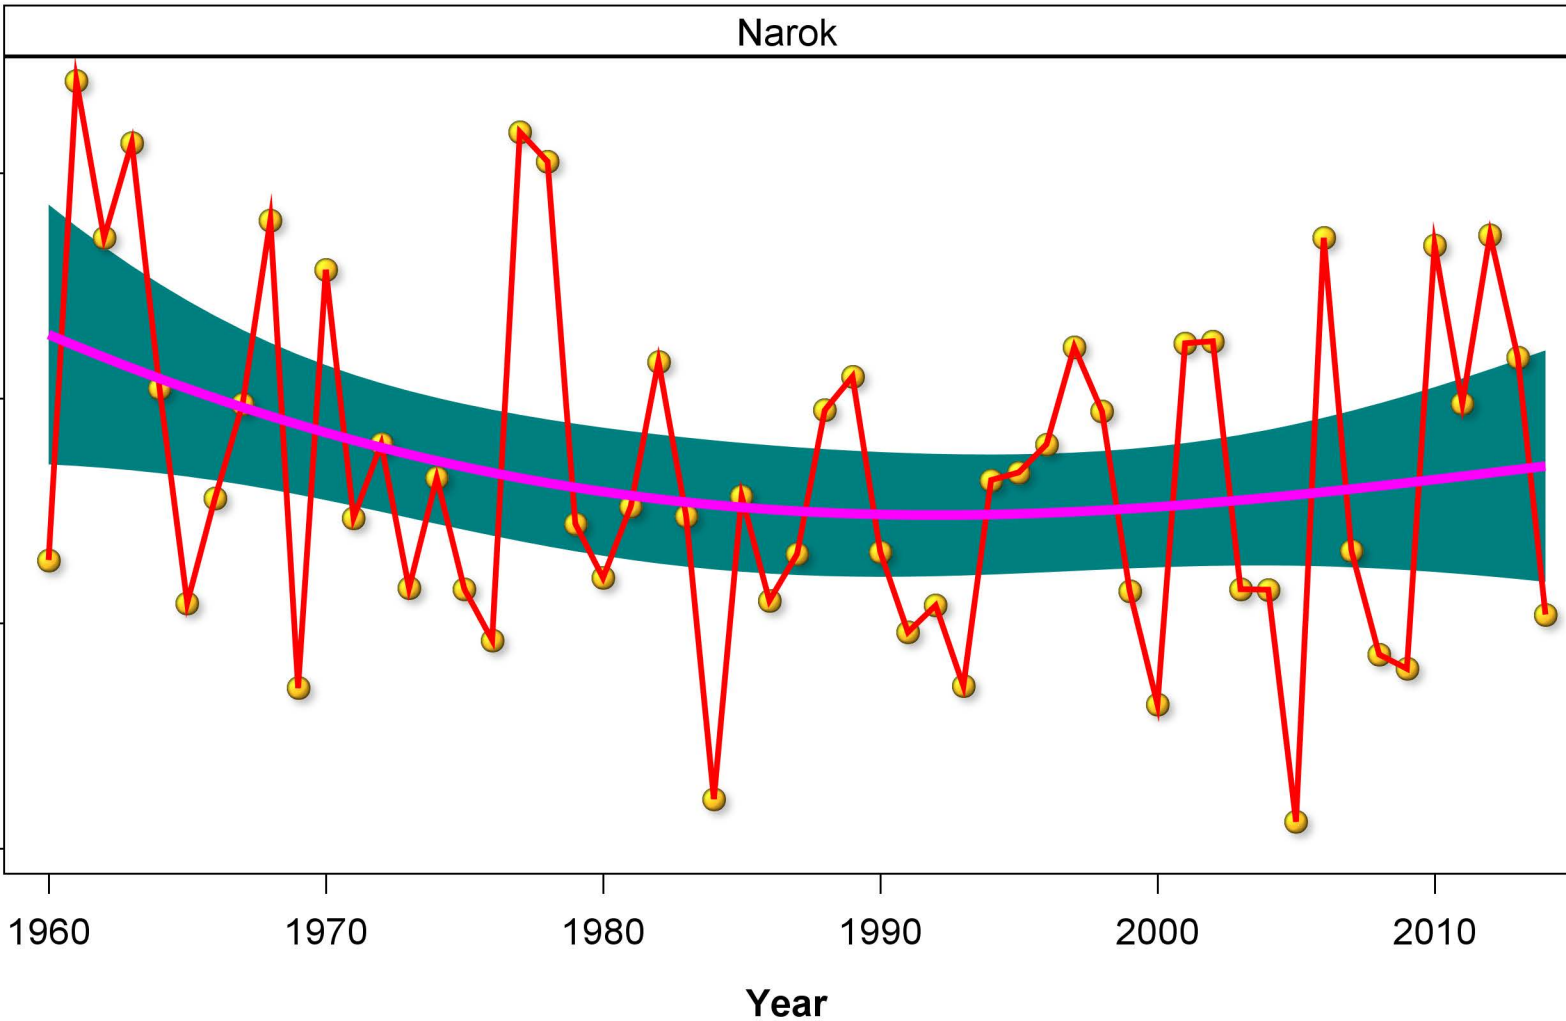

# Kajiado

Total annual rainfall in mm

Year

1000

800

600

400

1960

1970

1980

1990

2000

2010

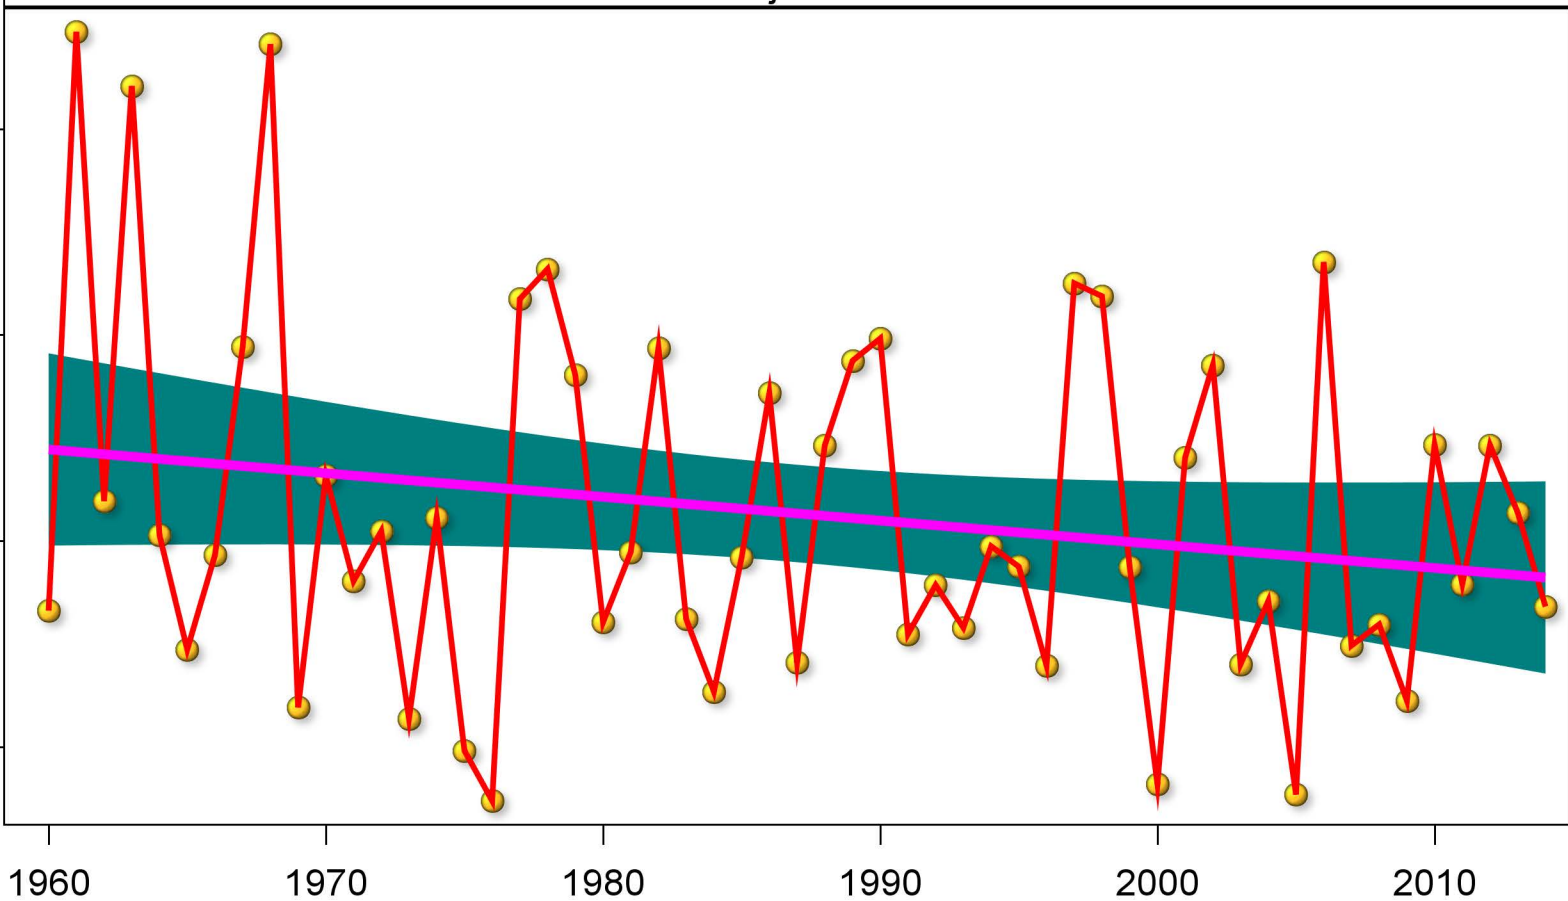

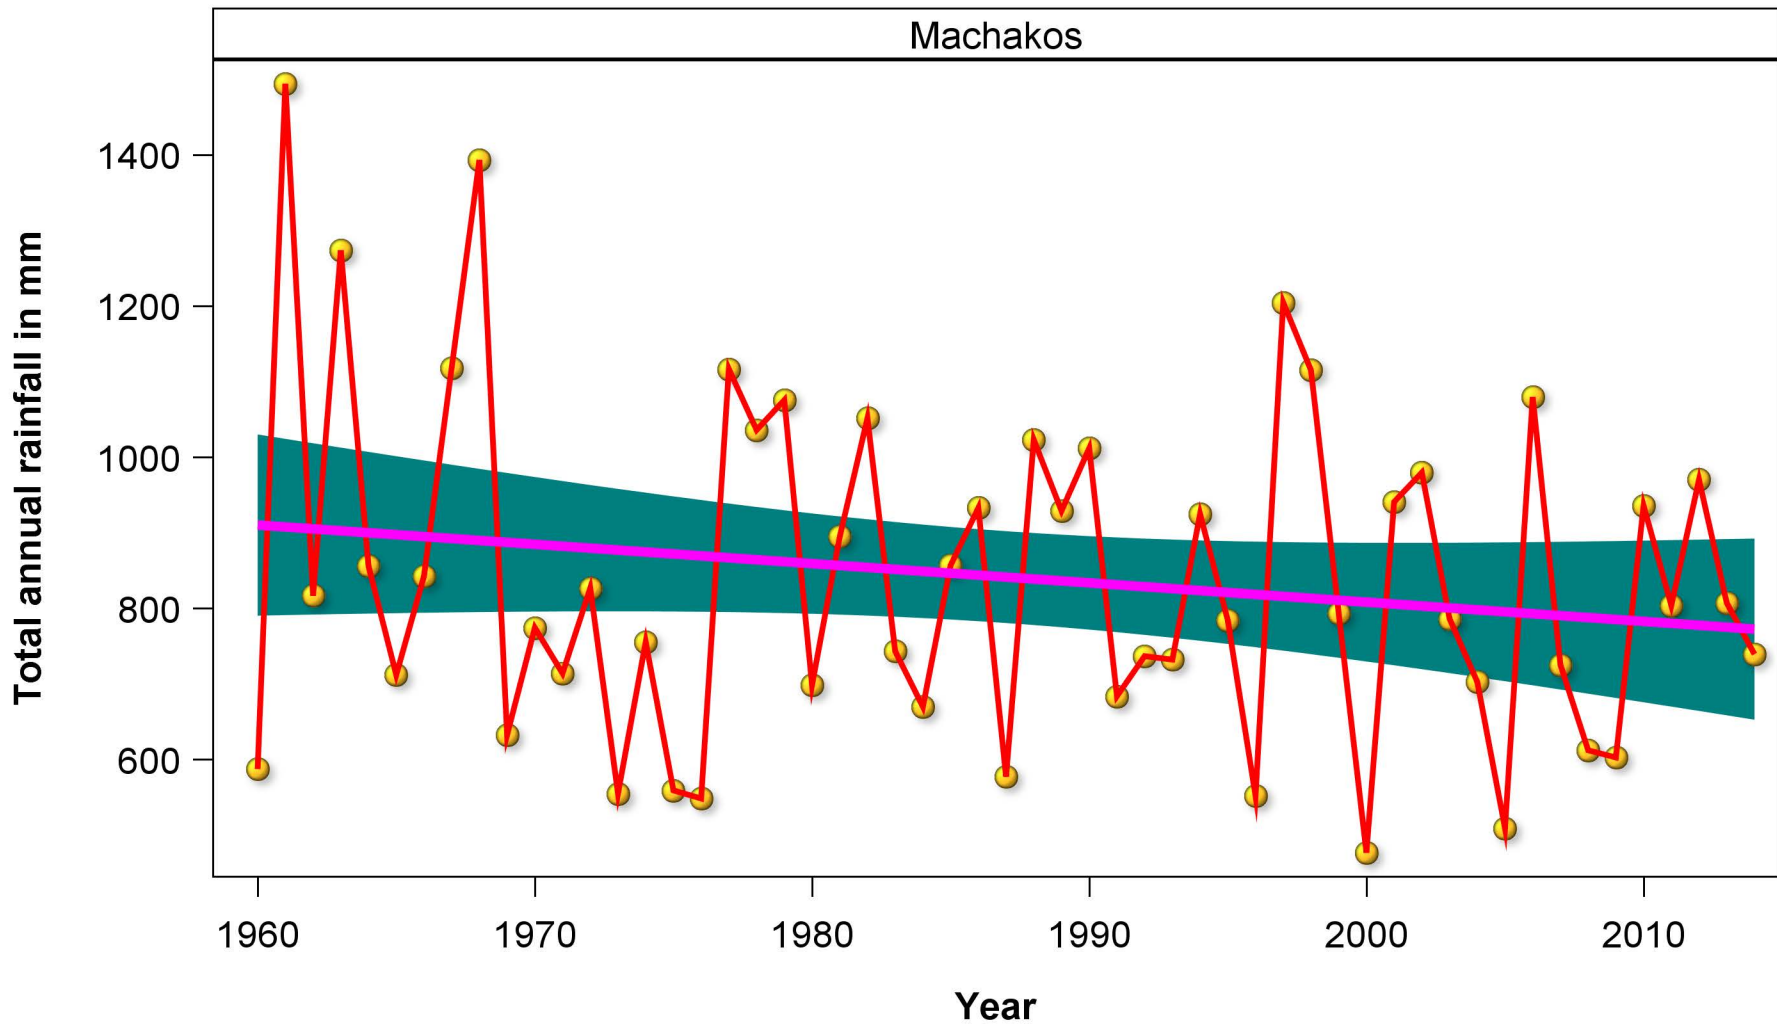

# Kitui

Total annual rainfall in mm

Year

1250  
1000  
750  
500

1960

1970

1980

1990

2000

2010

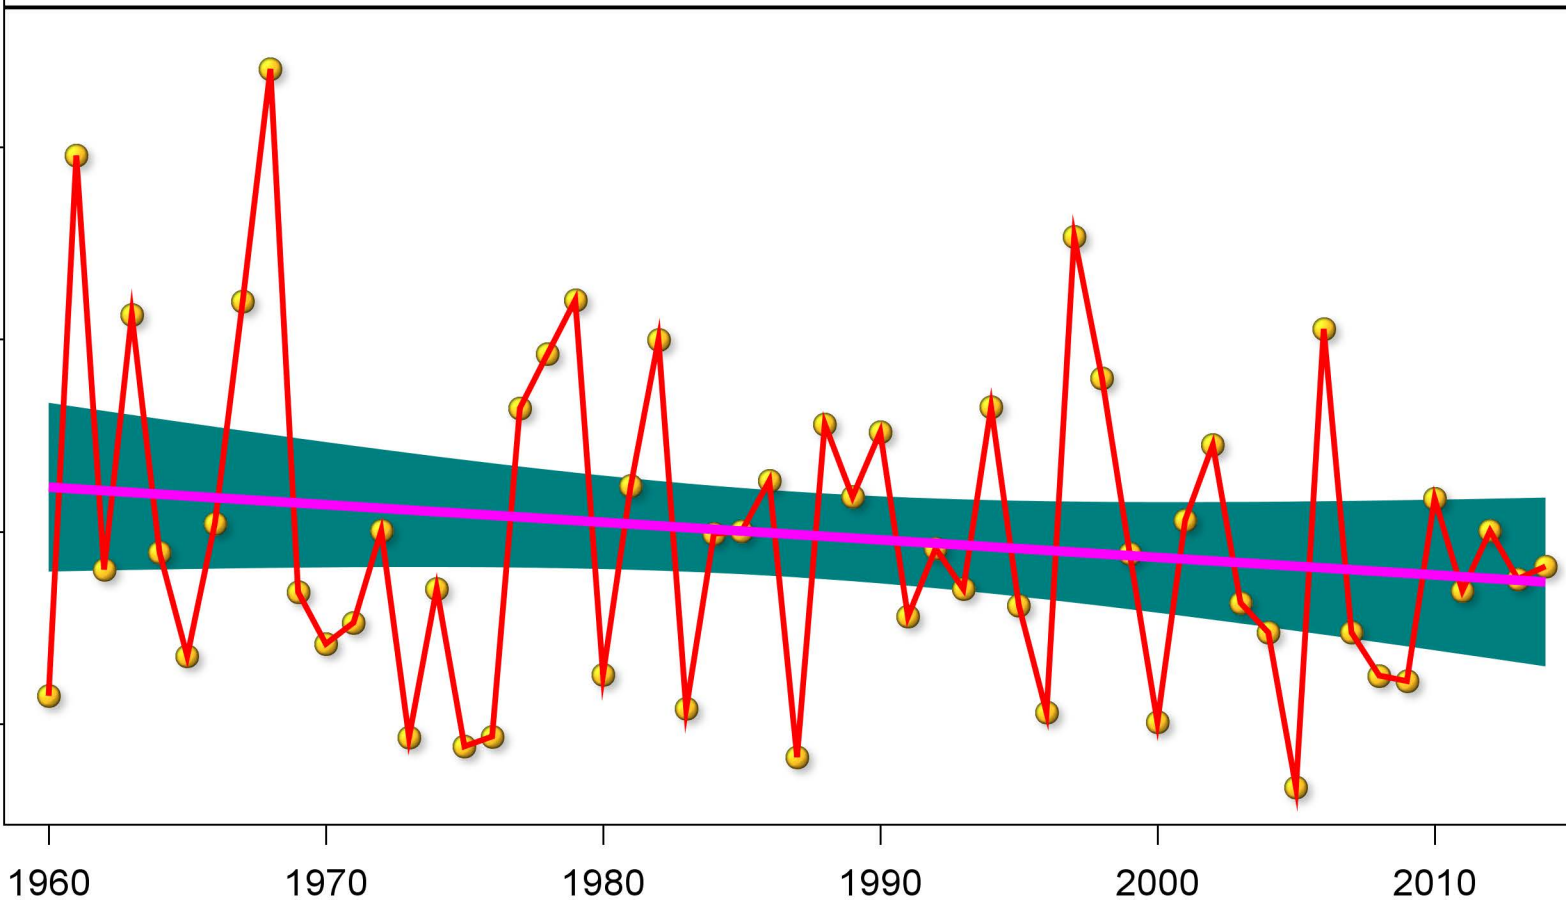

# Taita Taveta

Total annual rainfall in mm

1200  
1000  
800  
600  
400

1960

1970

1980

1990

2000

2010

Year

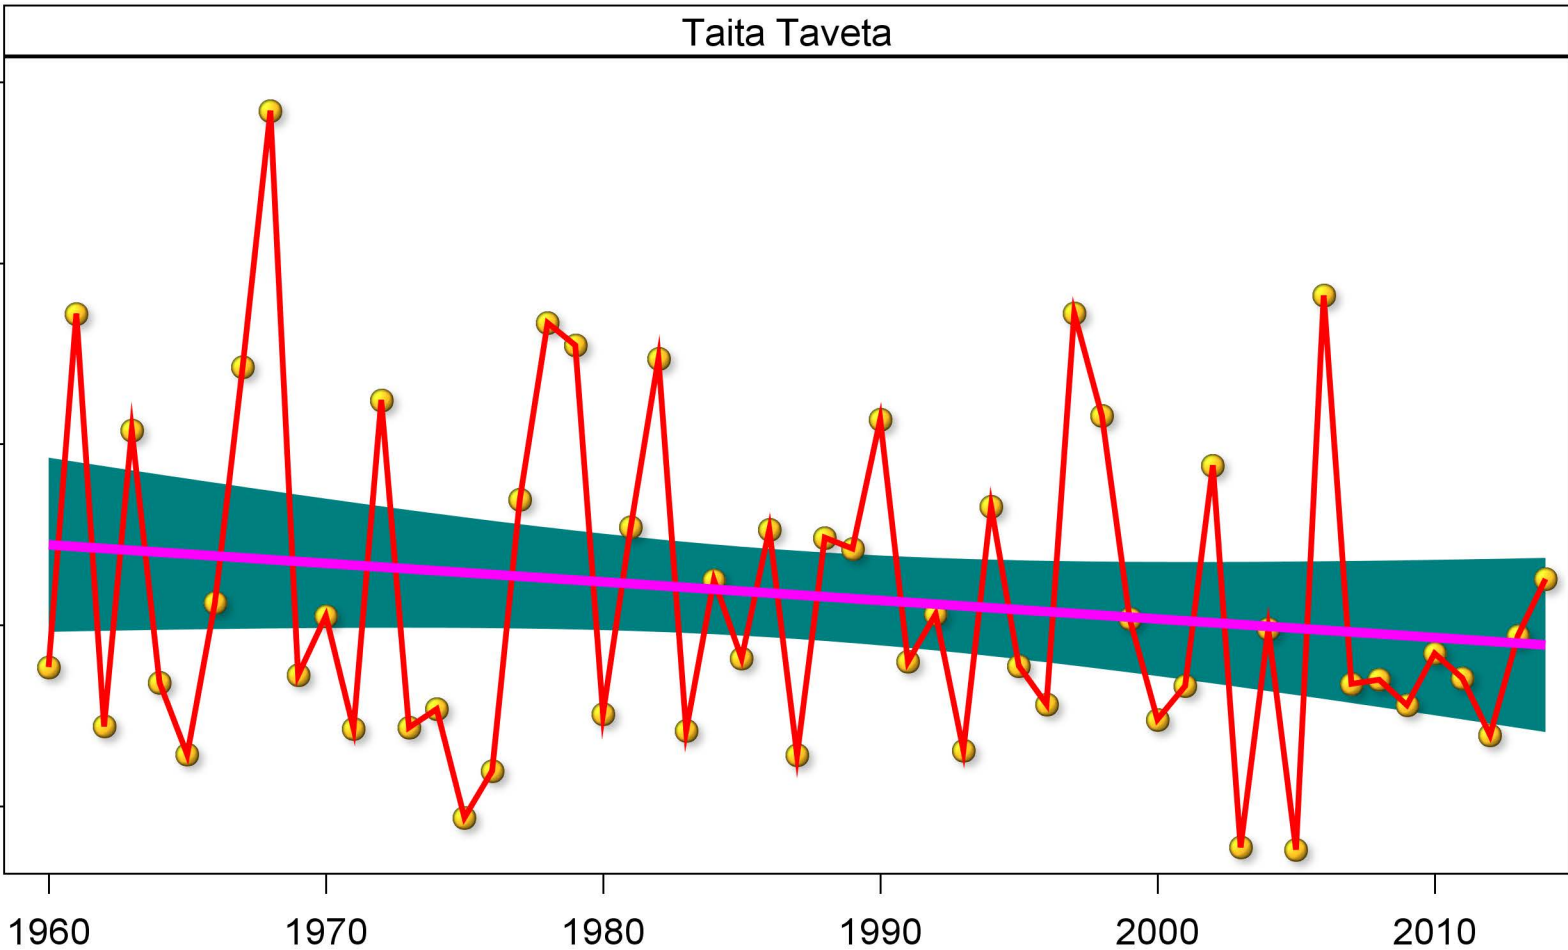

Total annual rainfall in mm

Kwale

1960

1970

1980

1990

2000

2010

Year

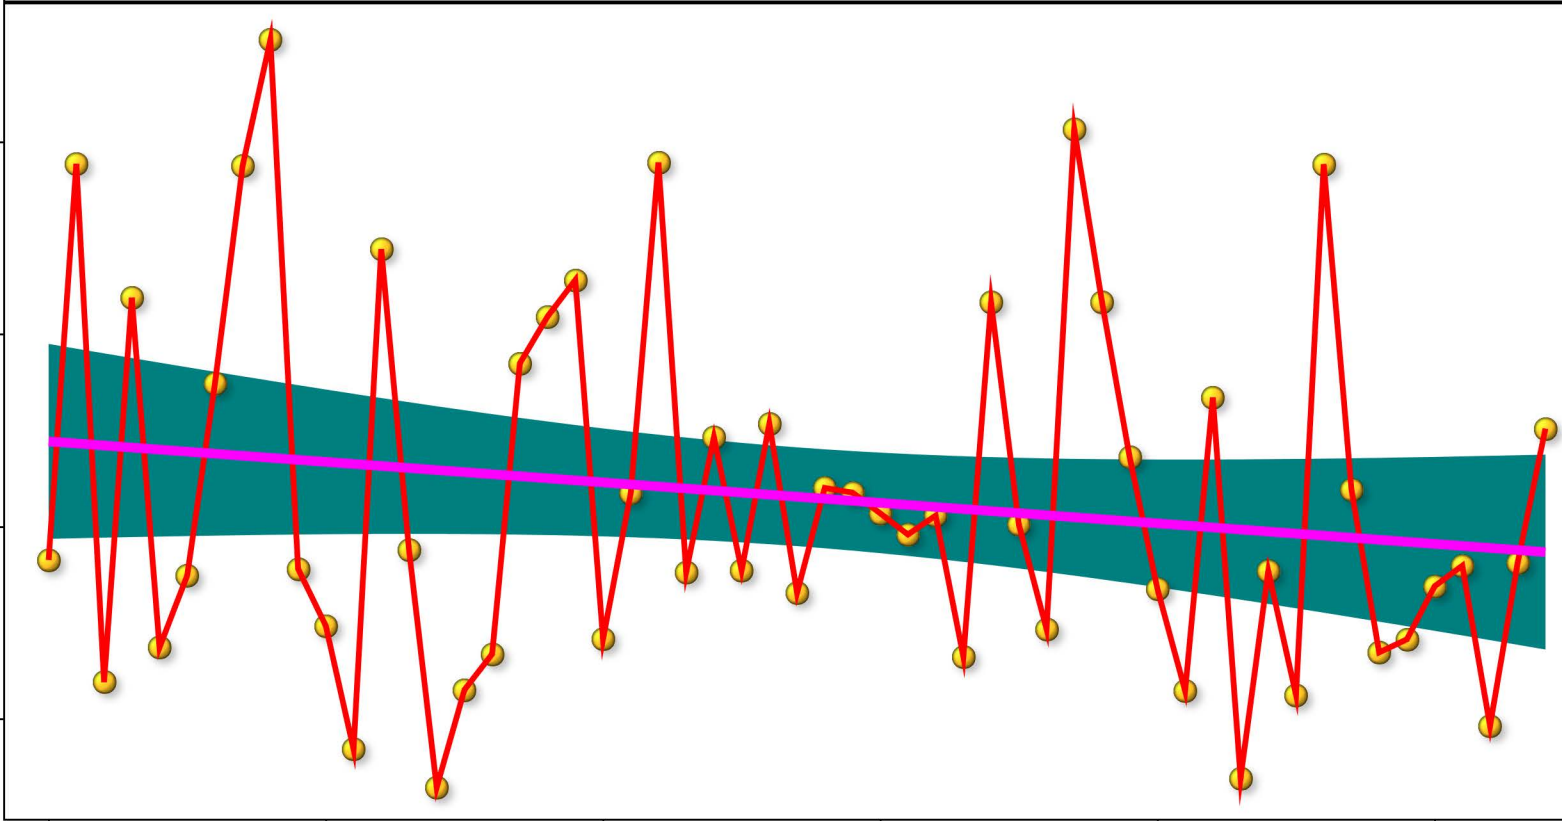

# Kilifi

Total annual rainfall in mm

Year

1400  
1200  
1000  
800  
600

1960

1970

1980

1990

2000

2010

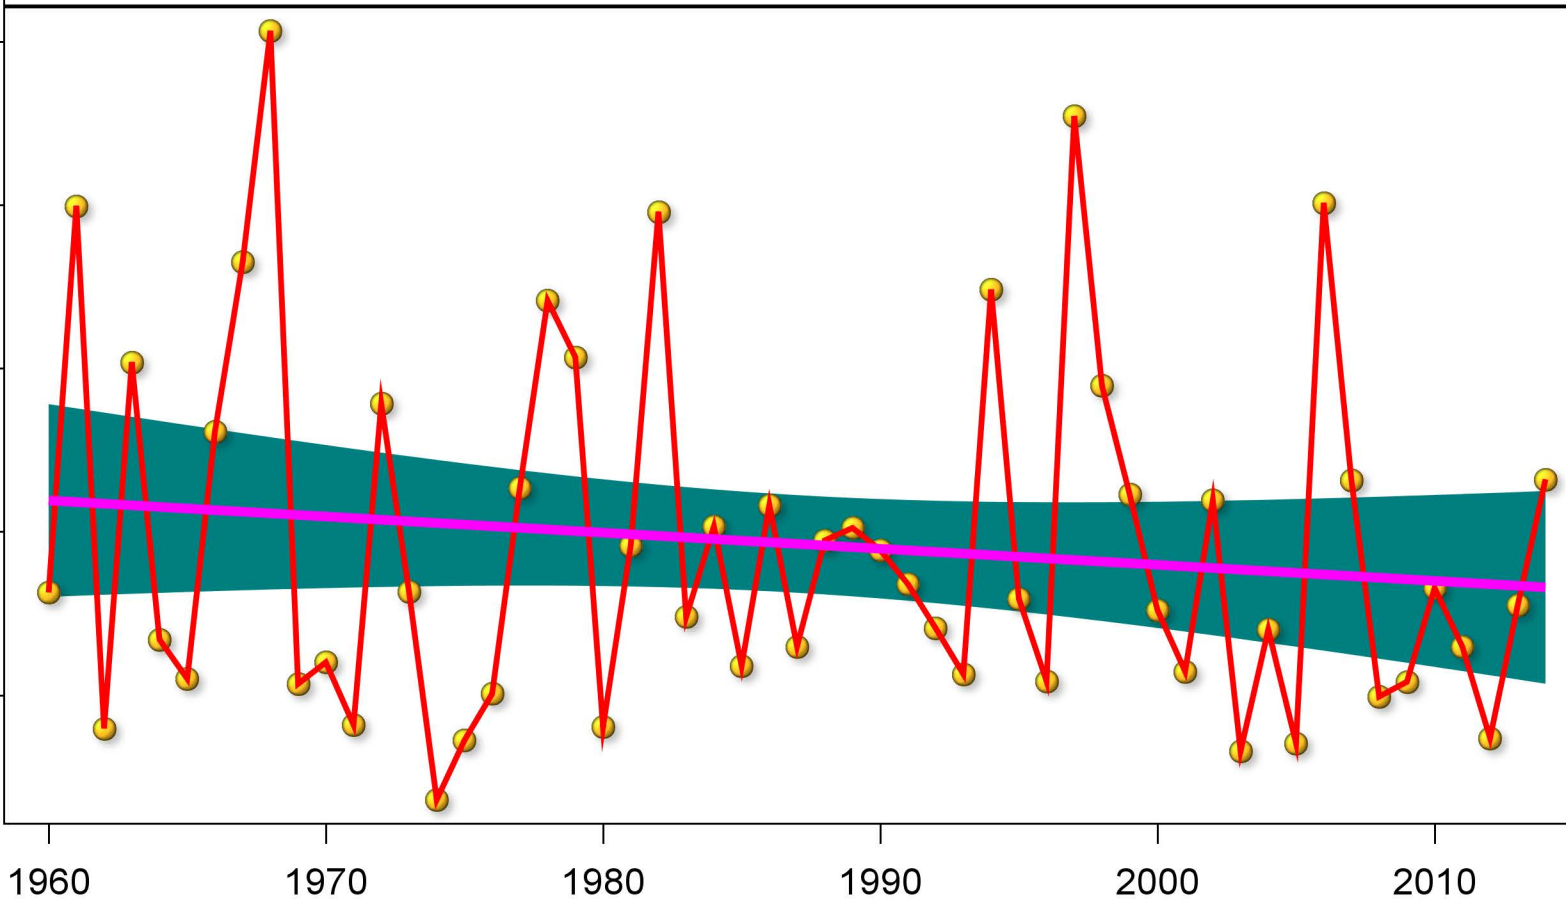



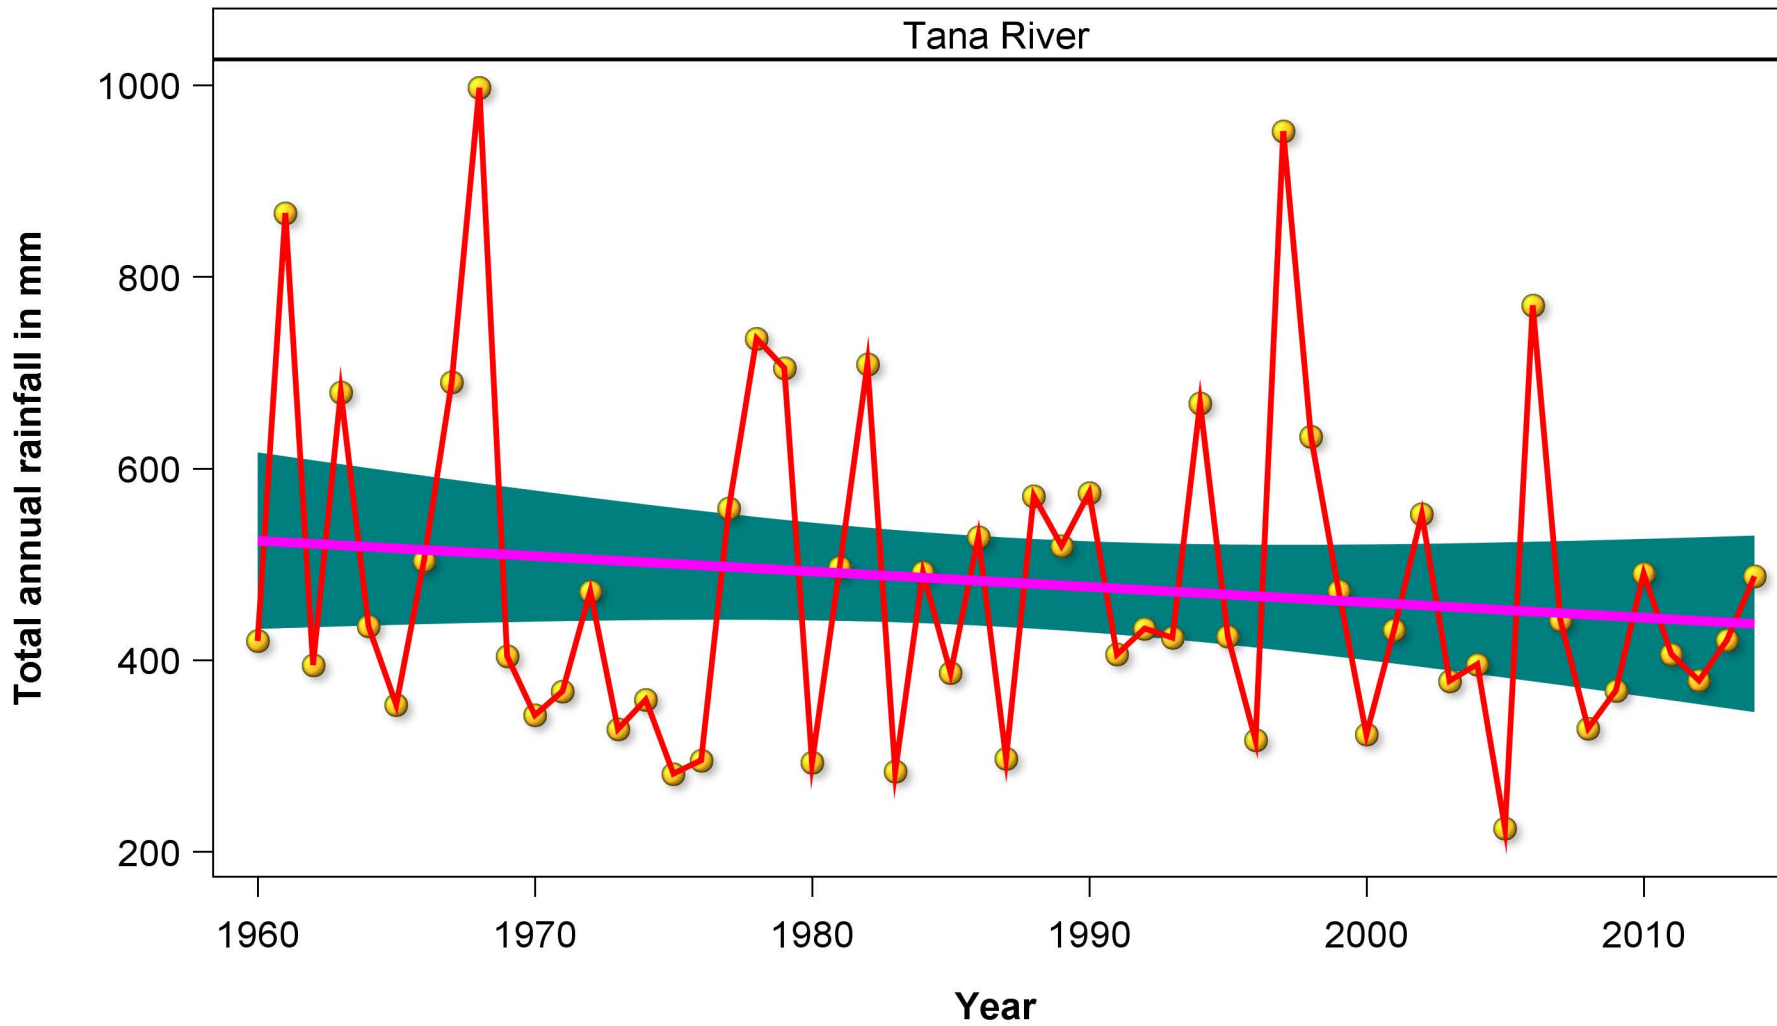



Total annual rainfall in mm

Lamu

1960

1970

1980

1990

2000

2010

Year

1400  
1200  
1000  
800  
600

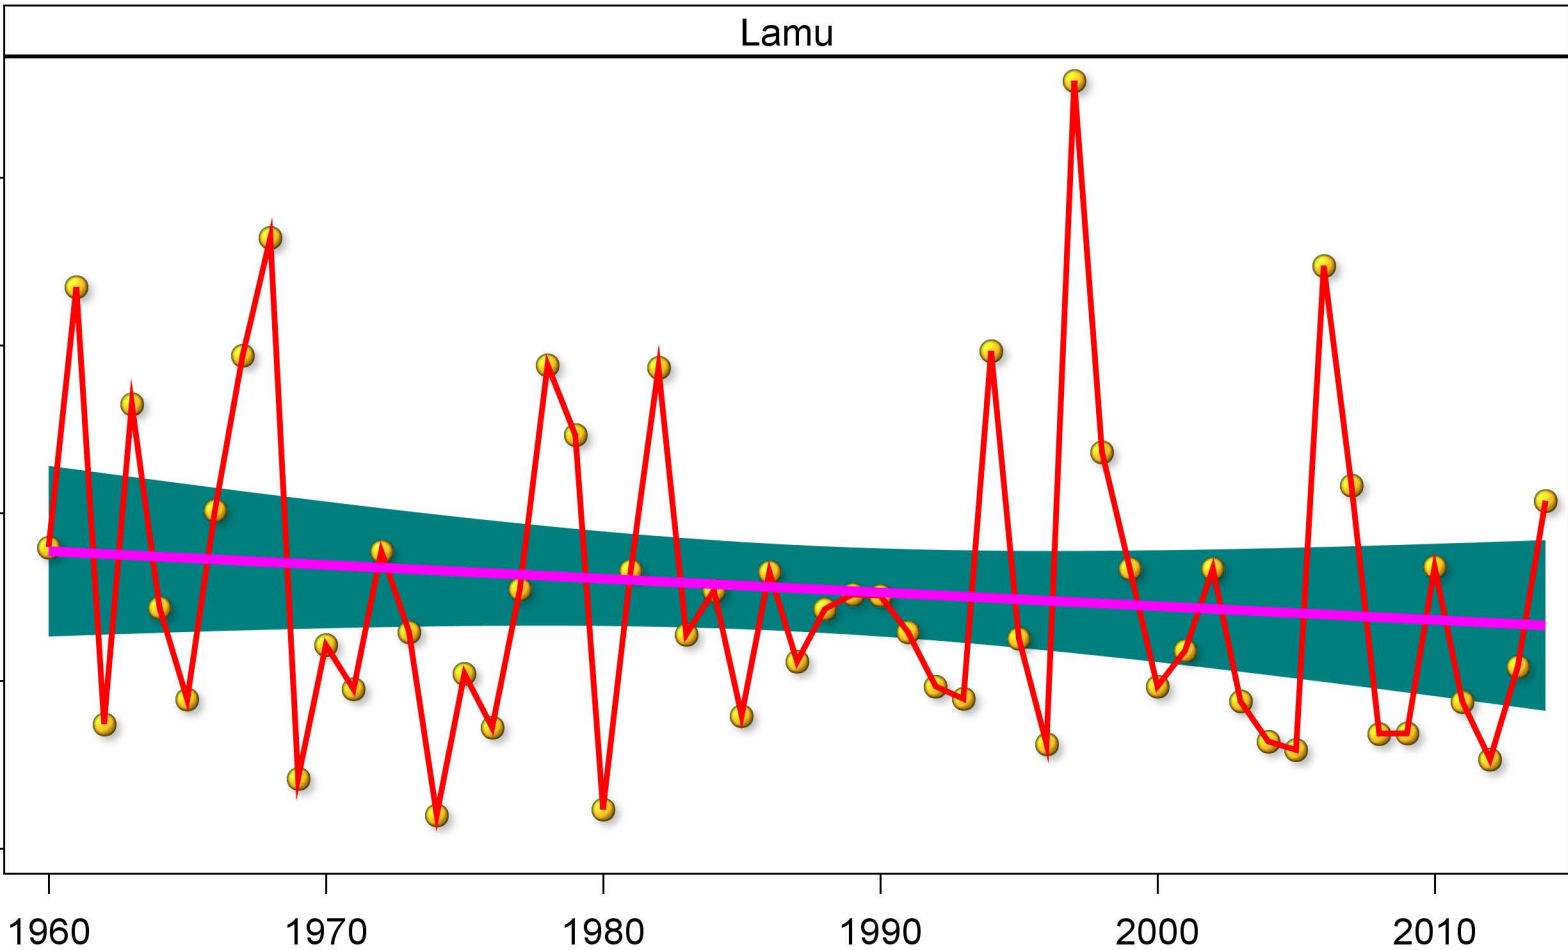

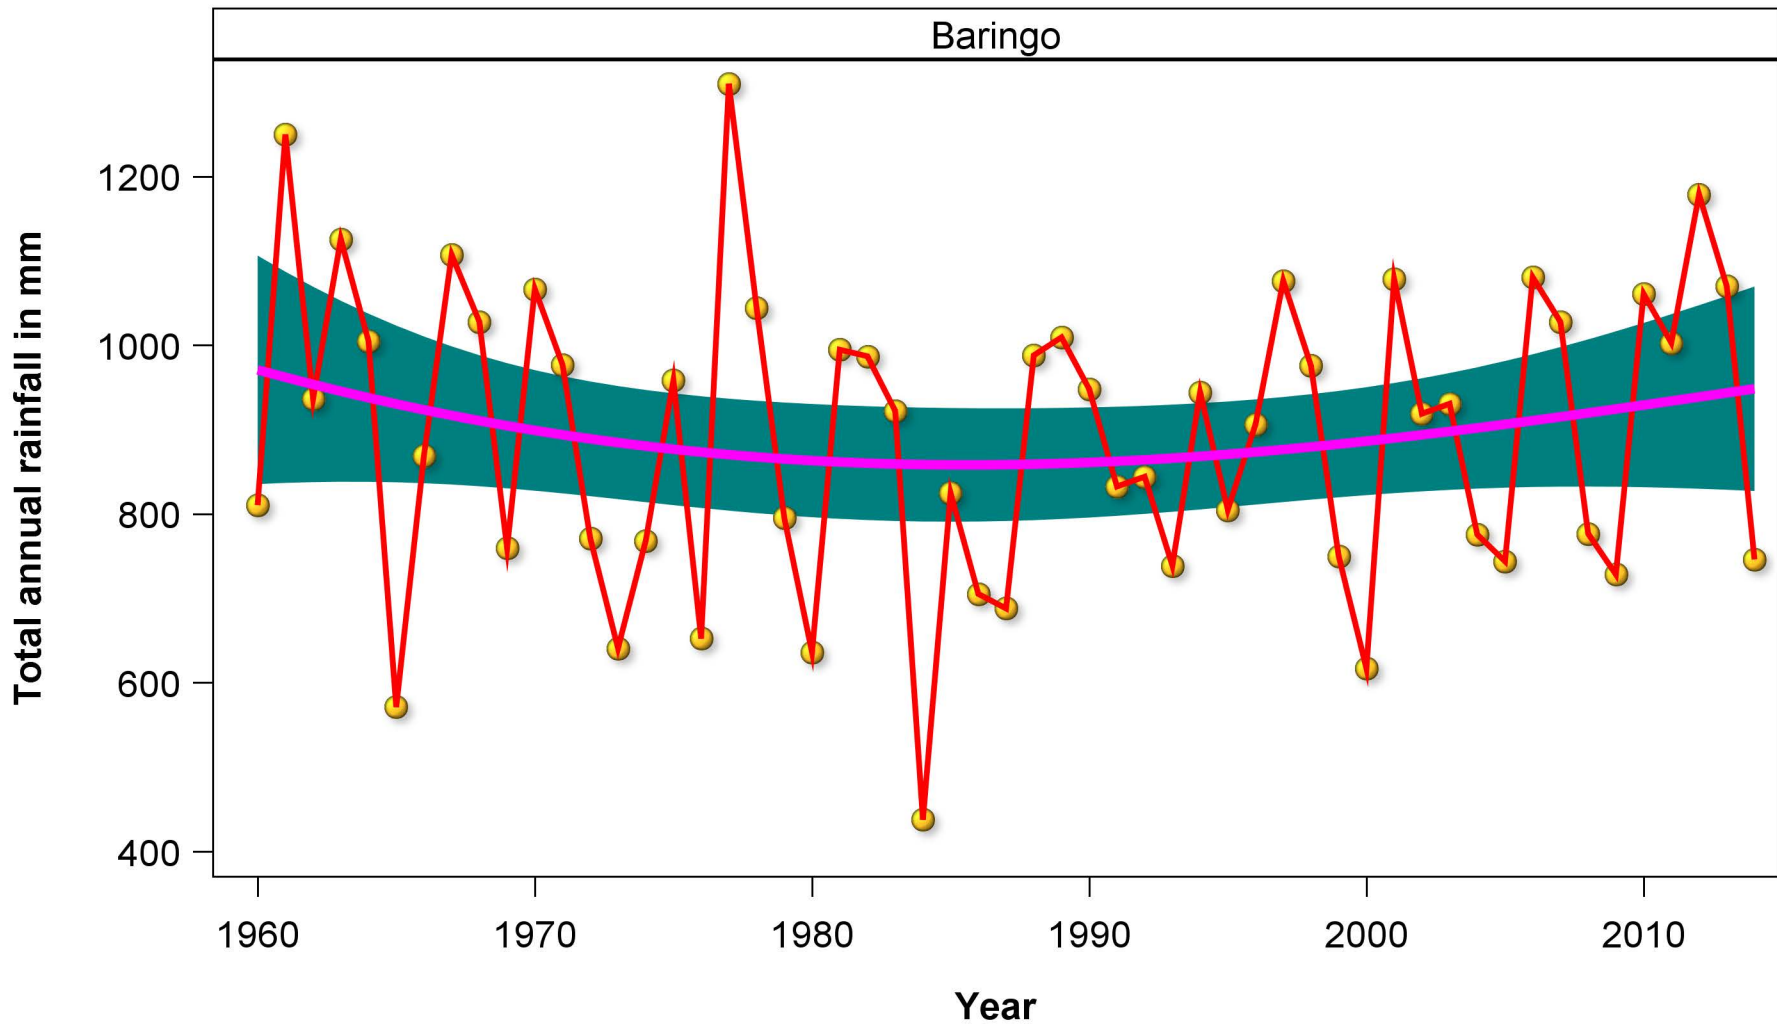

# Laikipia

Total annual rainfall in mm

1000  
800  
600  
400

1960

1970

1980

1990

2000

2010

Year

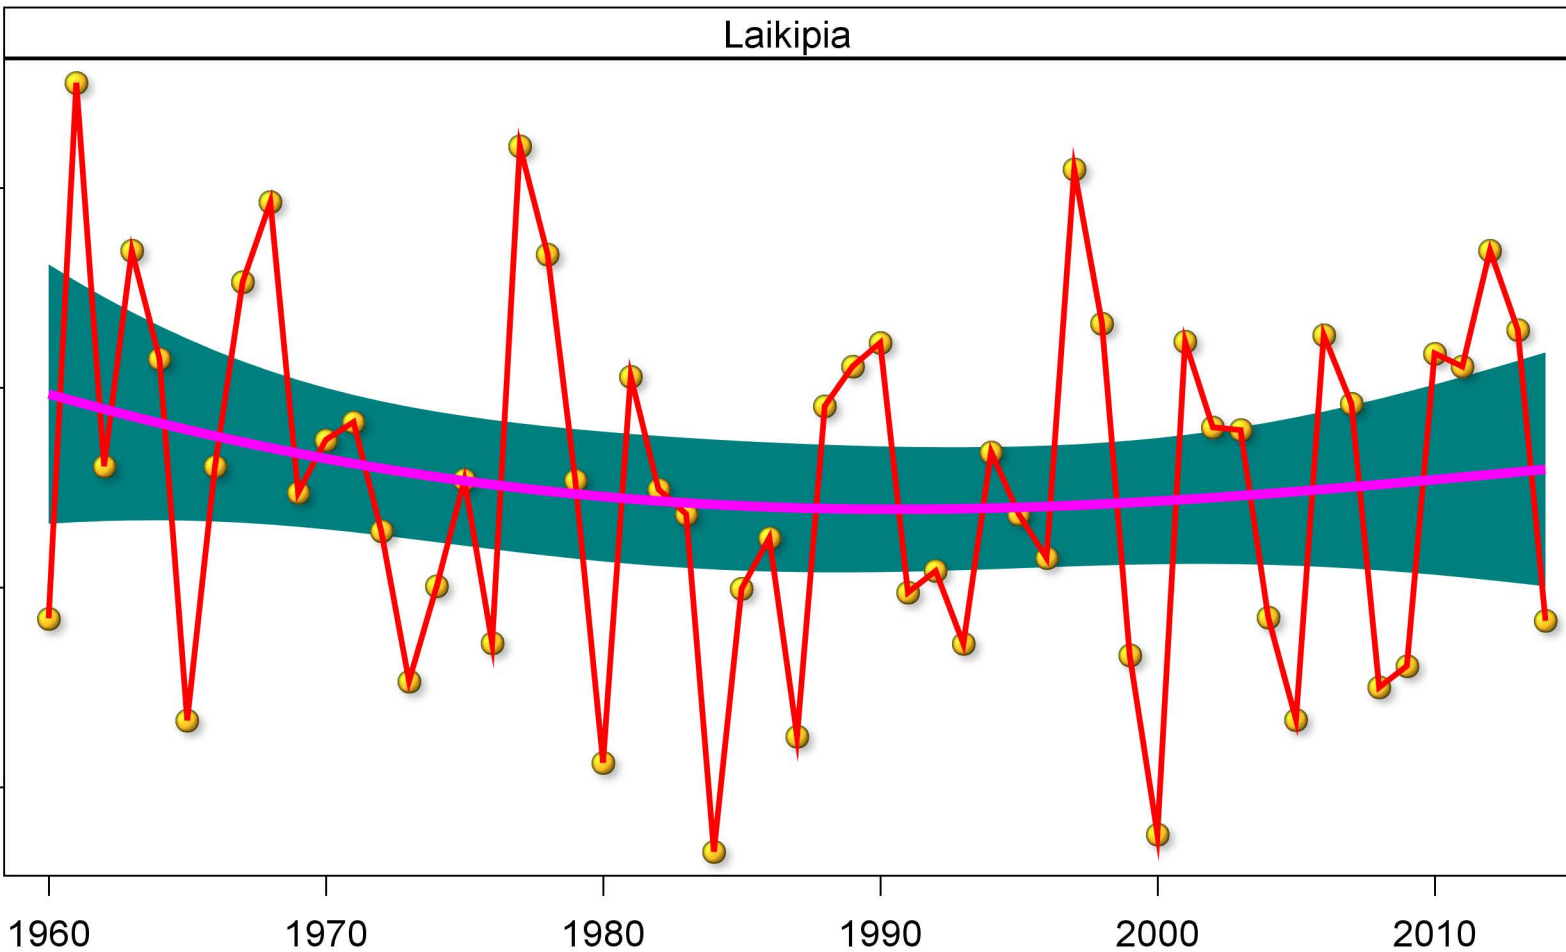

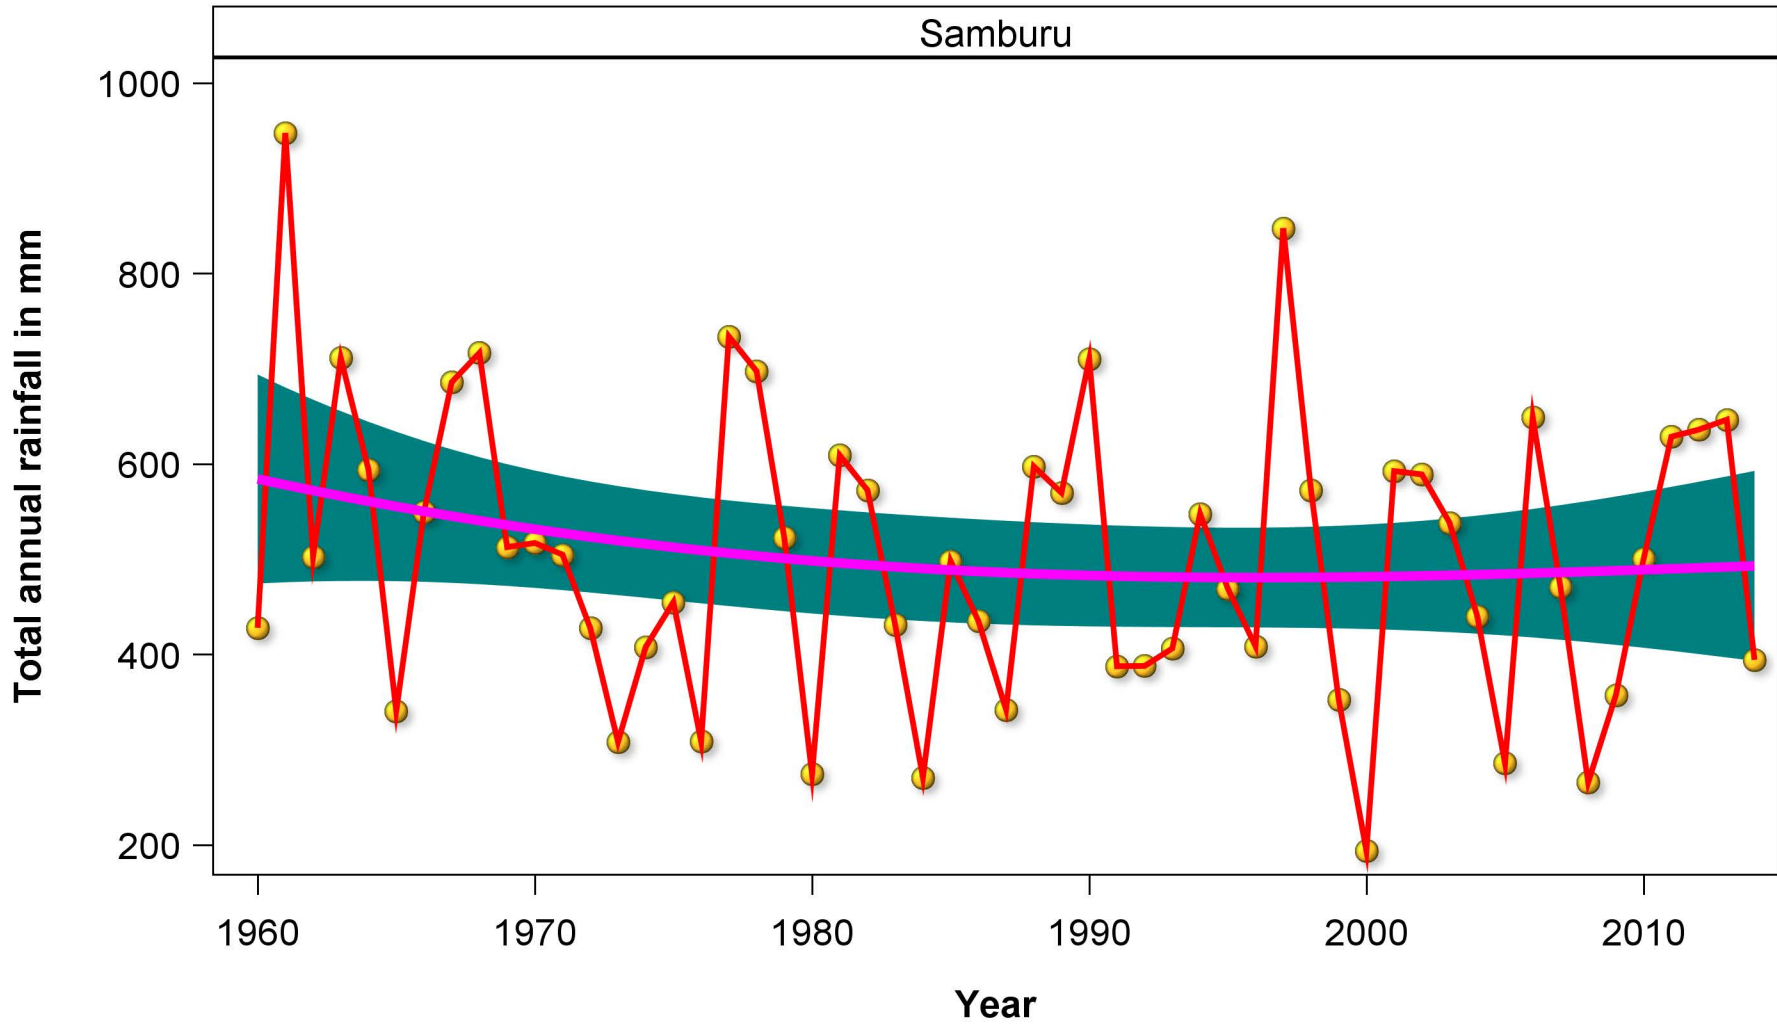

# Isiolo

Total annual rainfall in mm

Year

800  
600  
400  
200

1960

1970

1980

1990

2000

2010

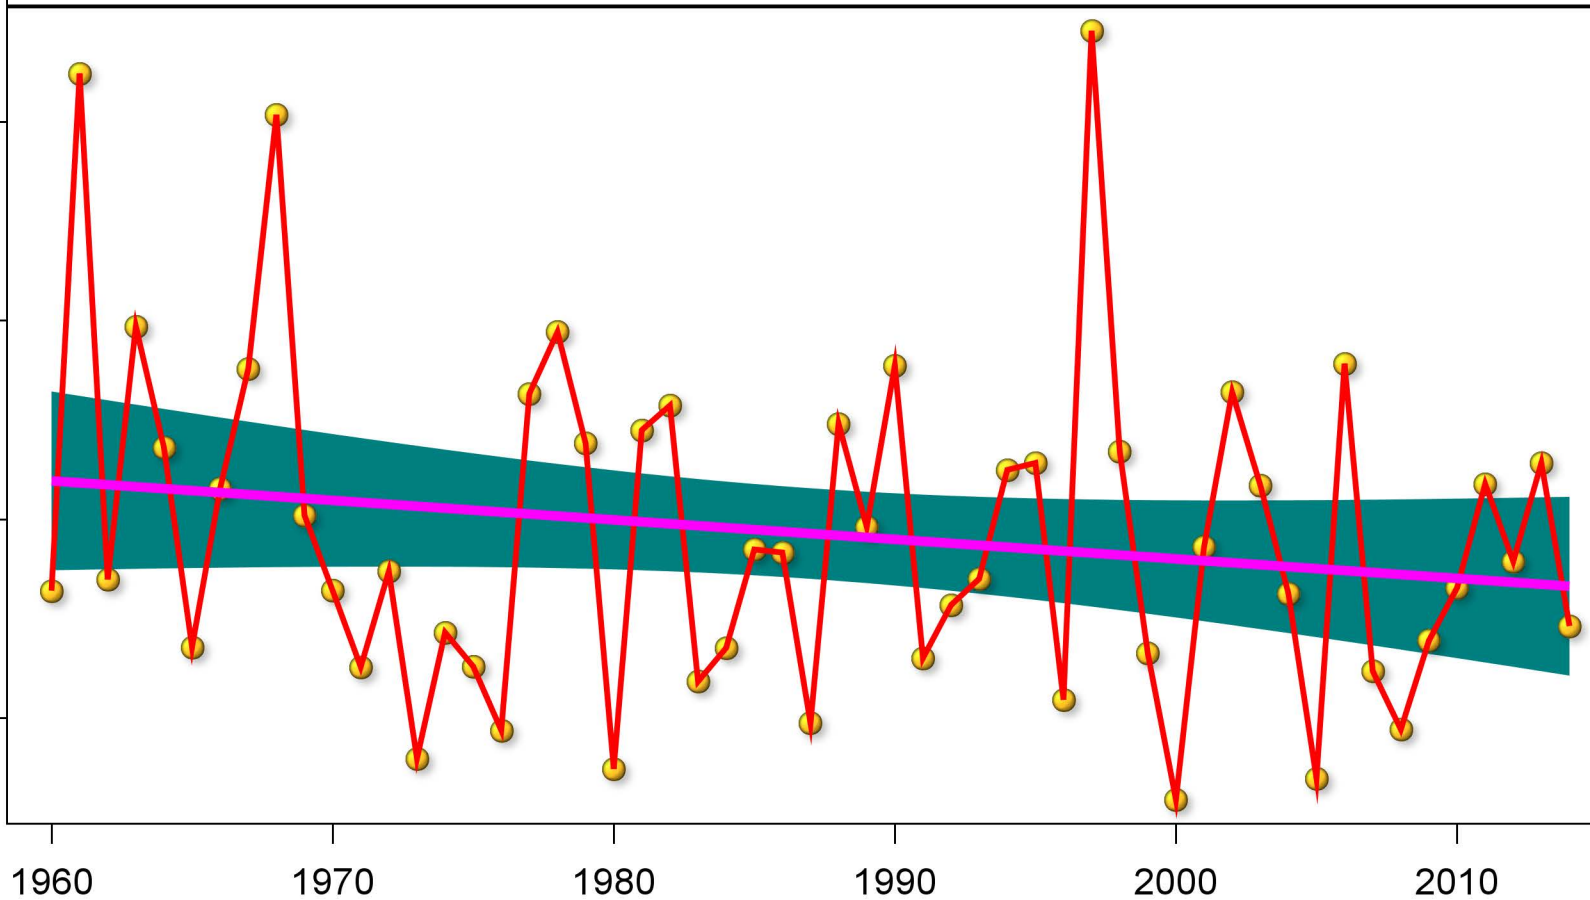

# Garissa

Total annual rainfall in mm

Year

1000

800

600

400

1960

1970

1980

1990

2000

2010

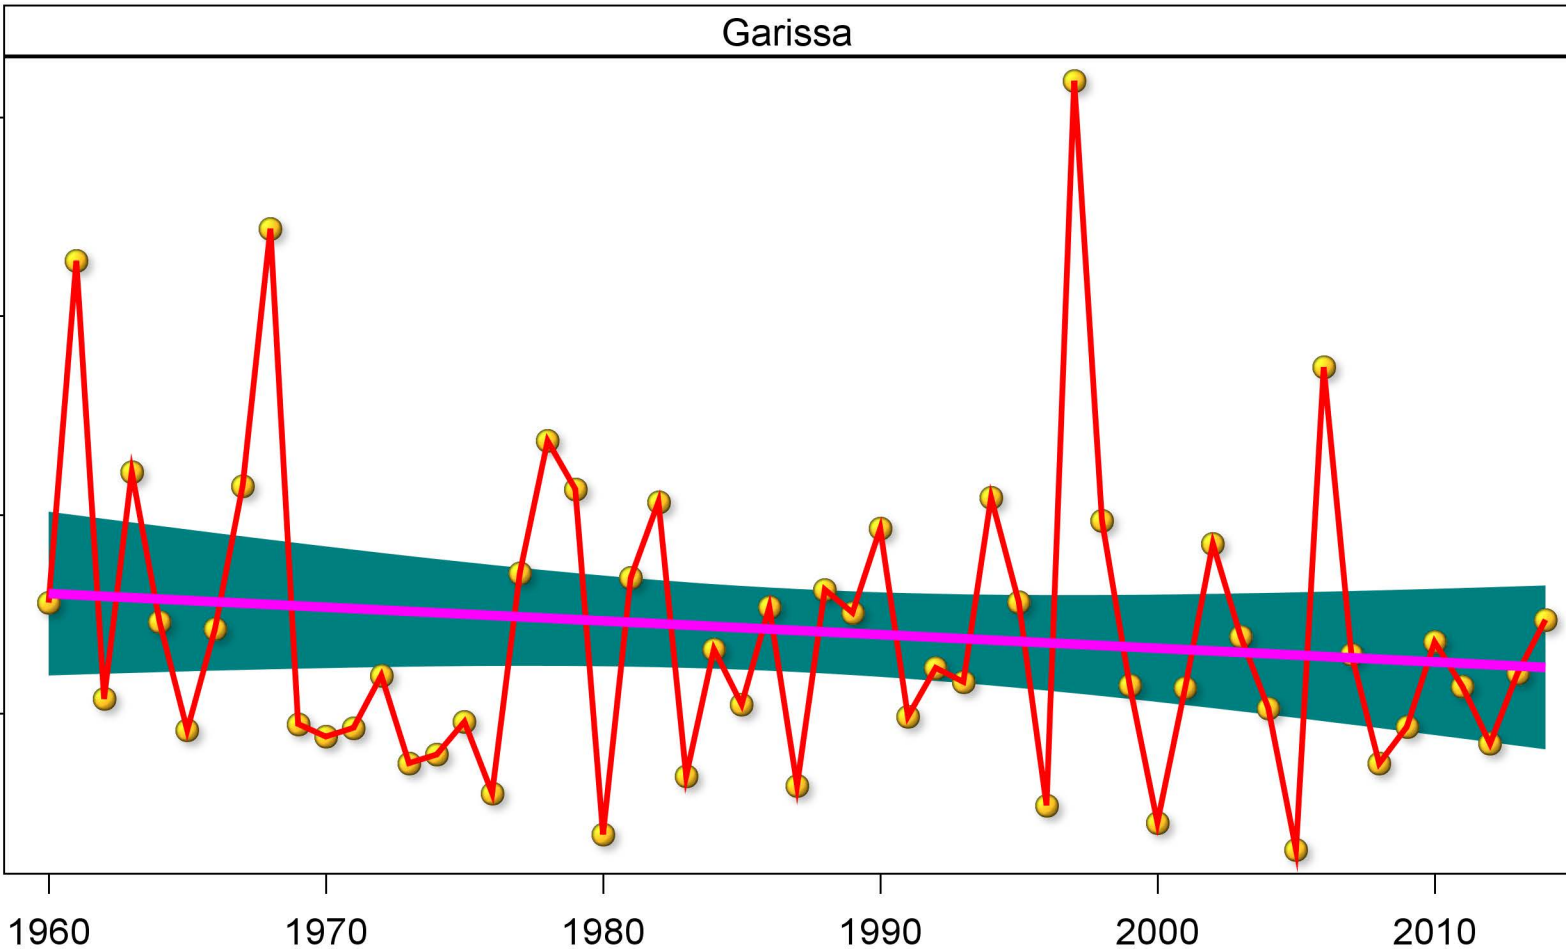

# Wajir

Total annual rainfall in mm

800  
600  
400  
200

1960

1970

1980

1990

2000

2010

Year

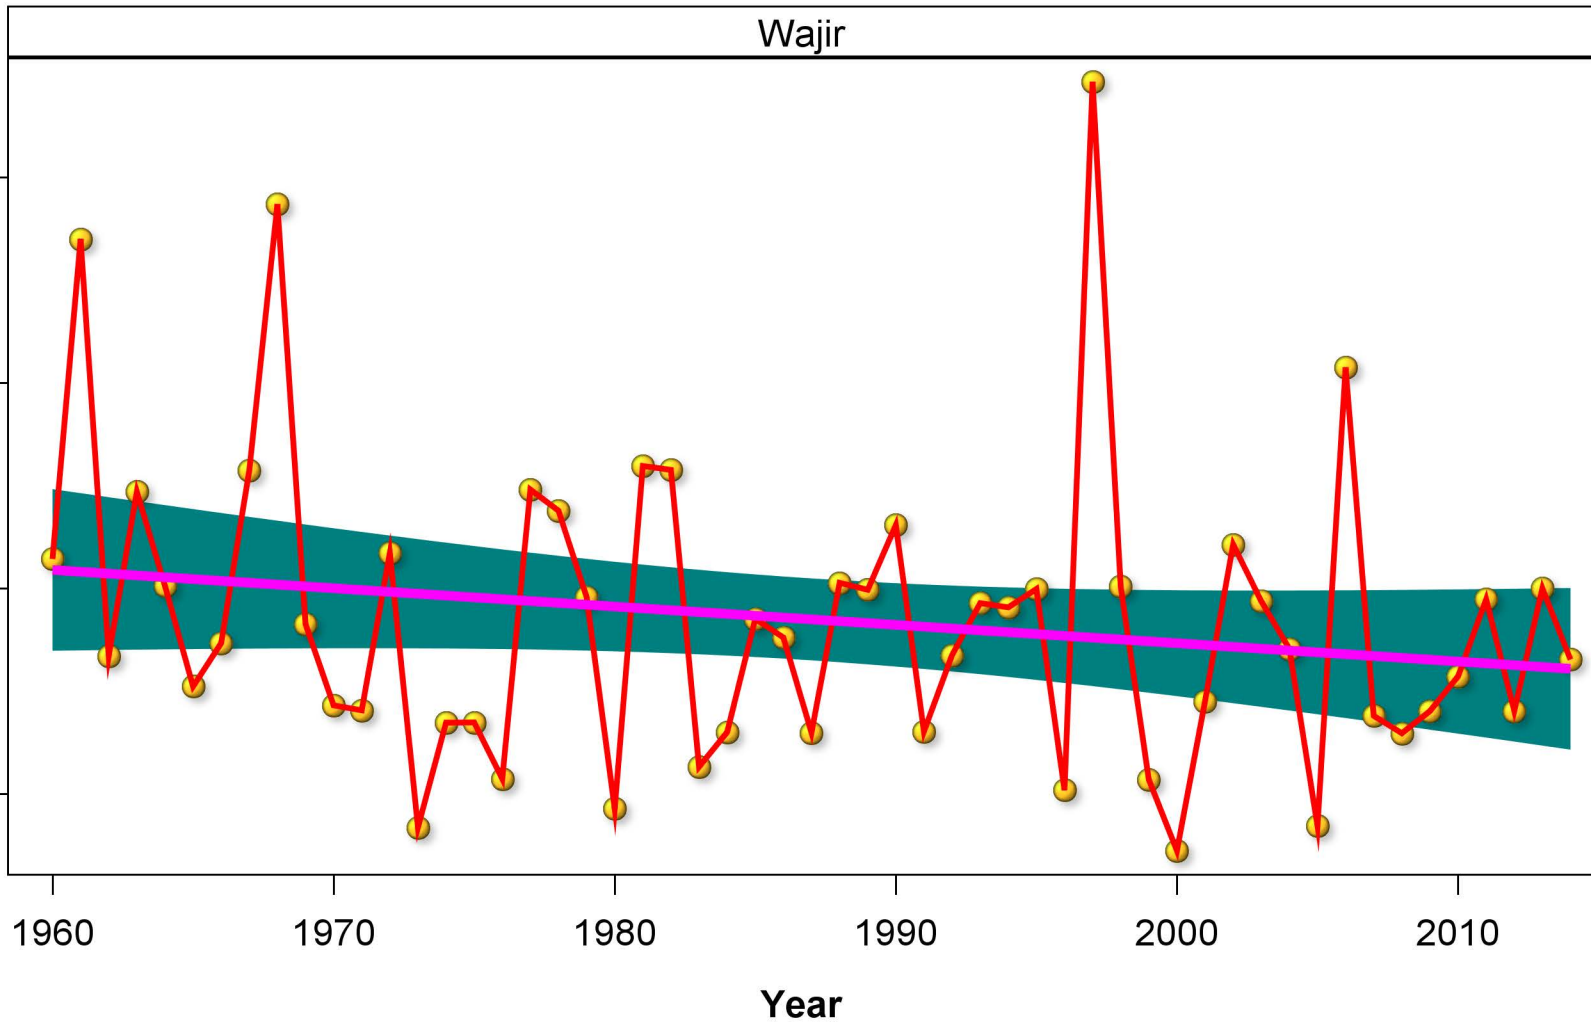



# Mandera

Total annual rainfall in mm

800  
600  
400  
200

1960

1970

1980

1990

2000

2010

Year

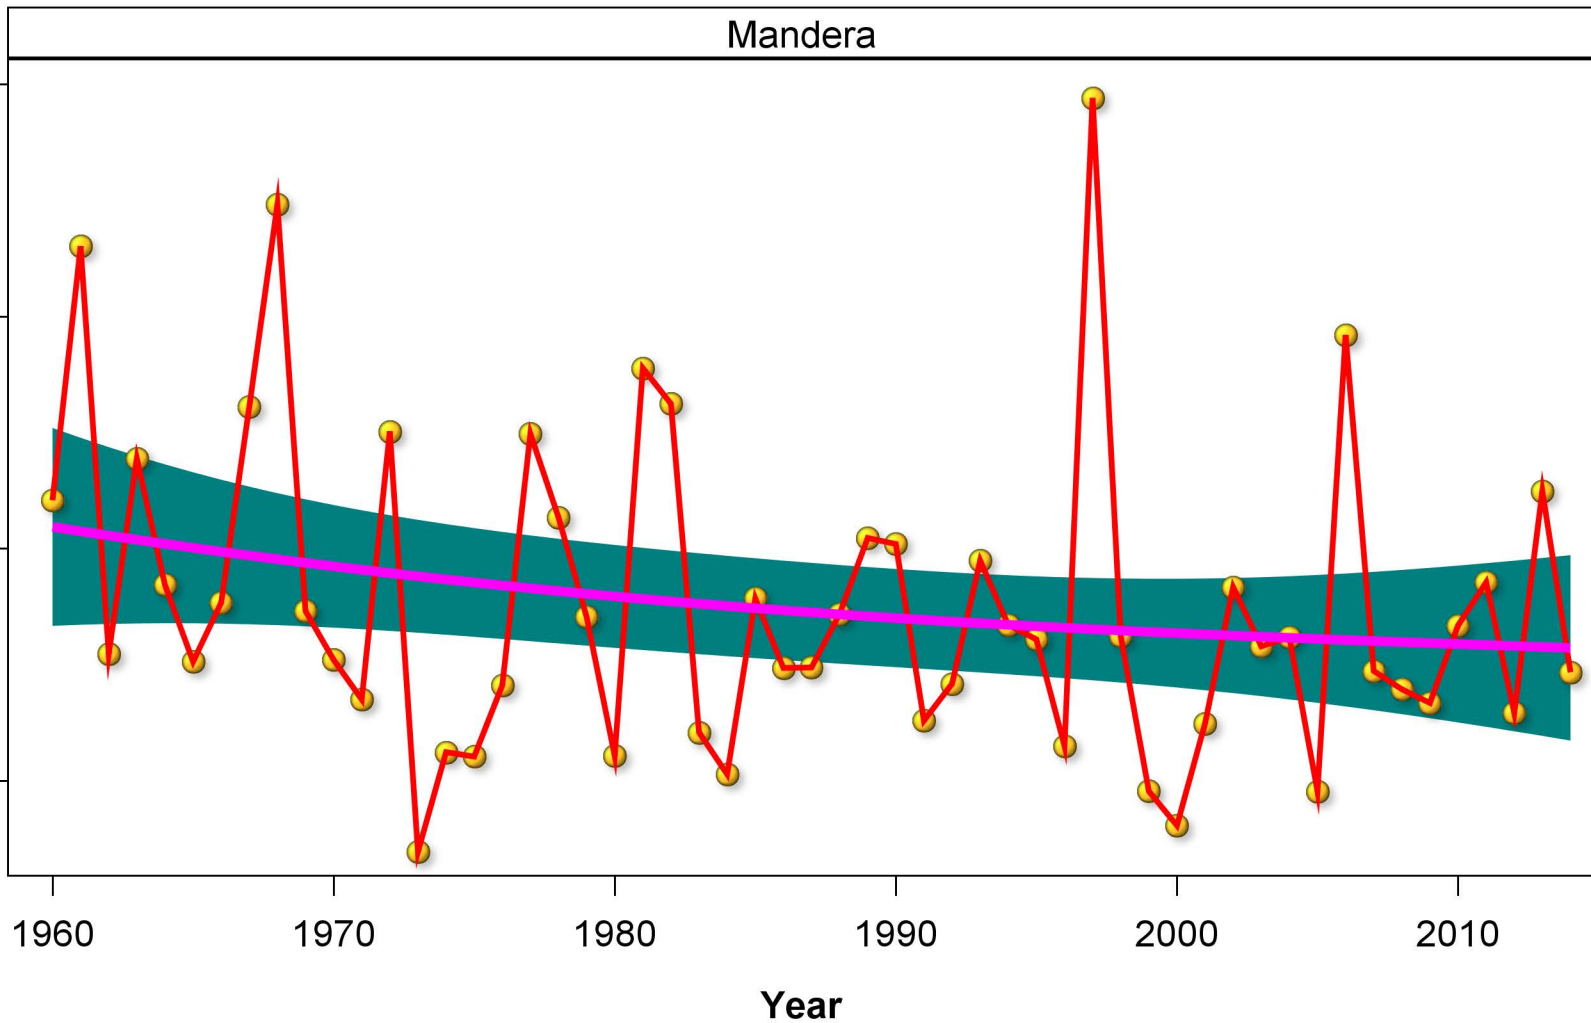

# Marsabit

Total annual rainfall in mm

Year

800  
600  
400  
200

1960

1970

1980

1990

2000

2010

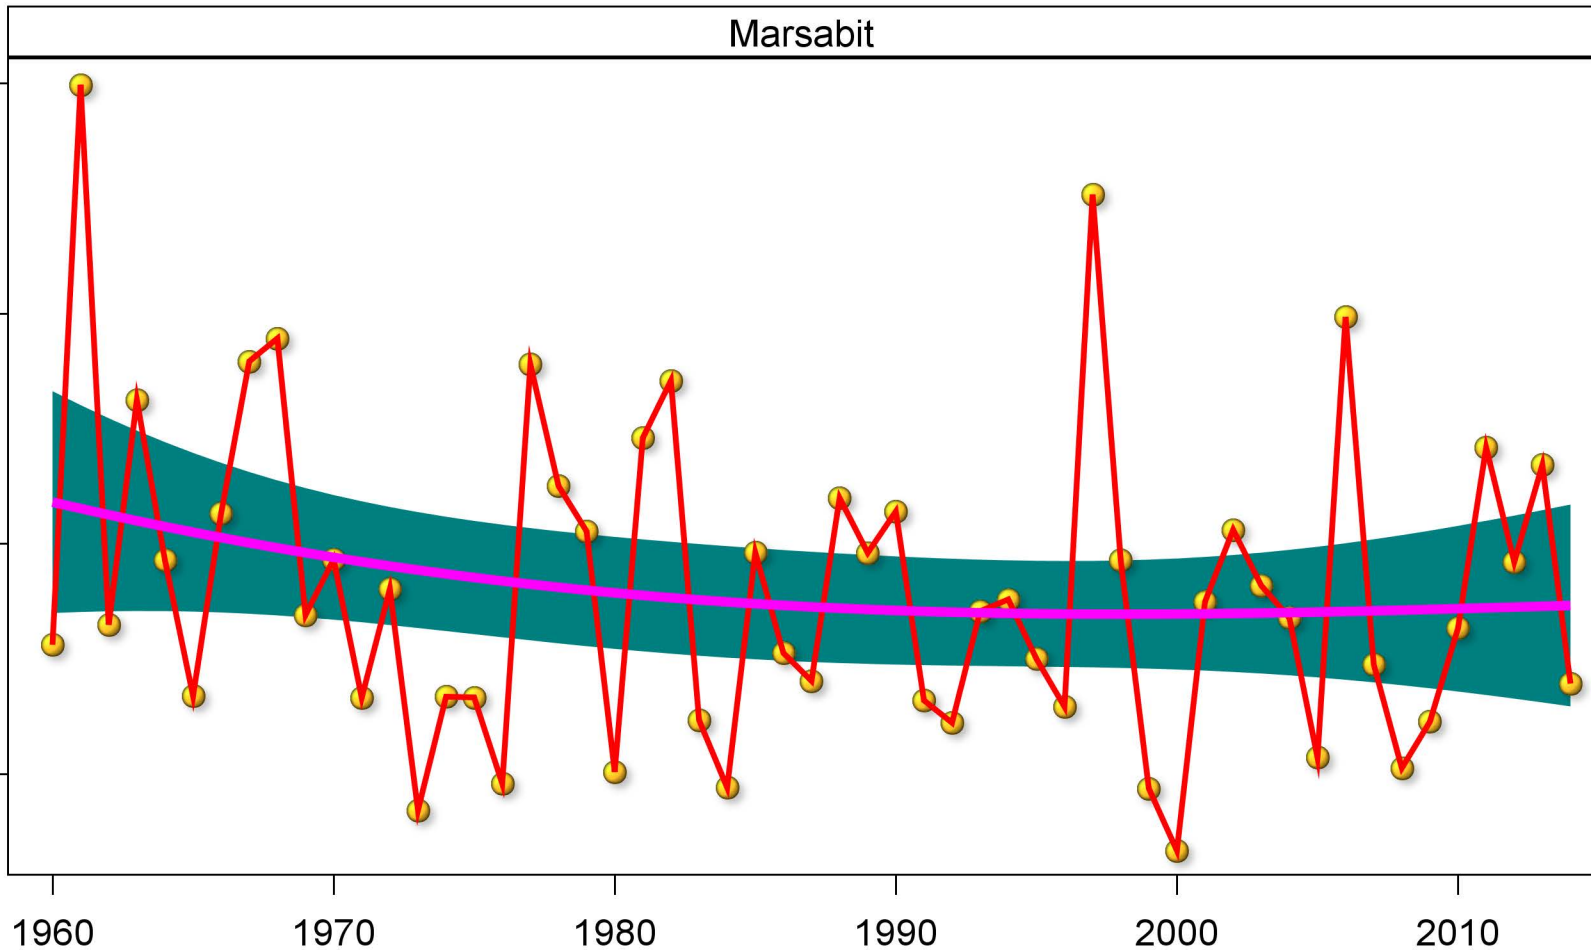

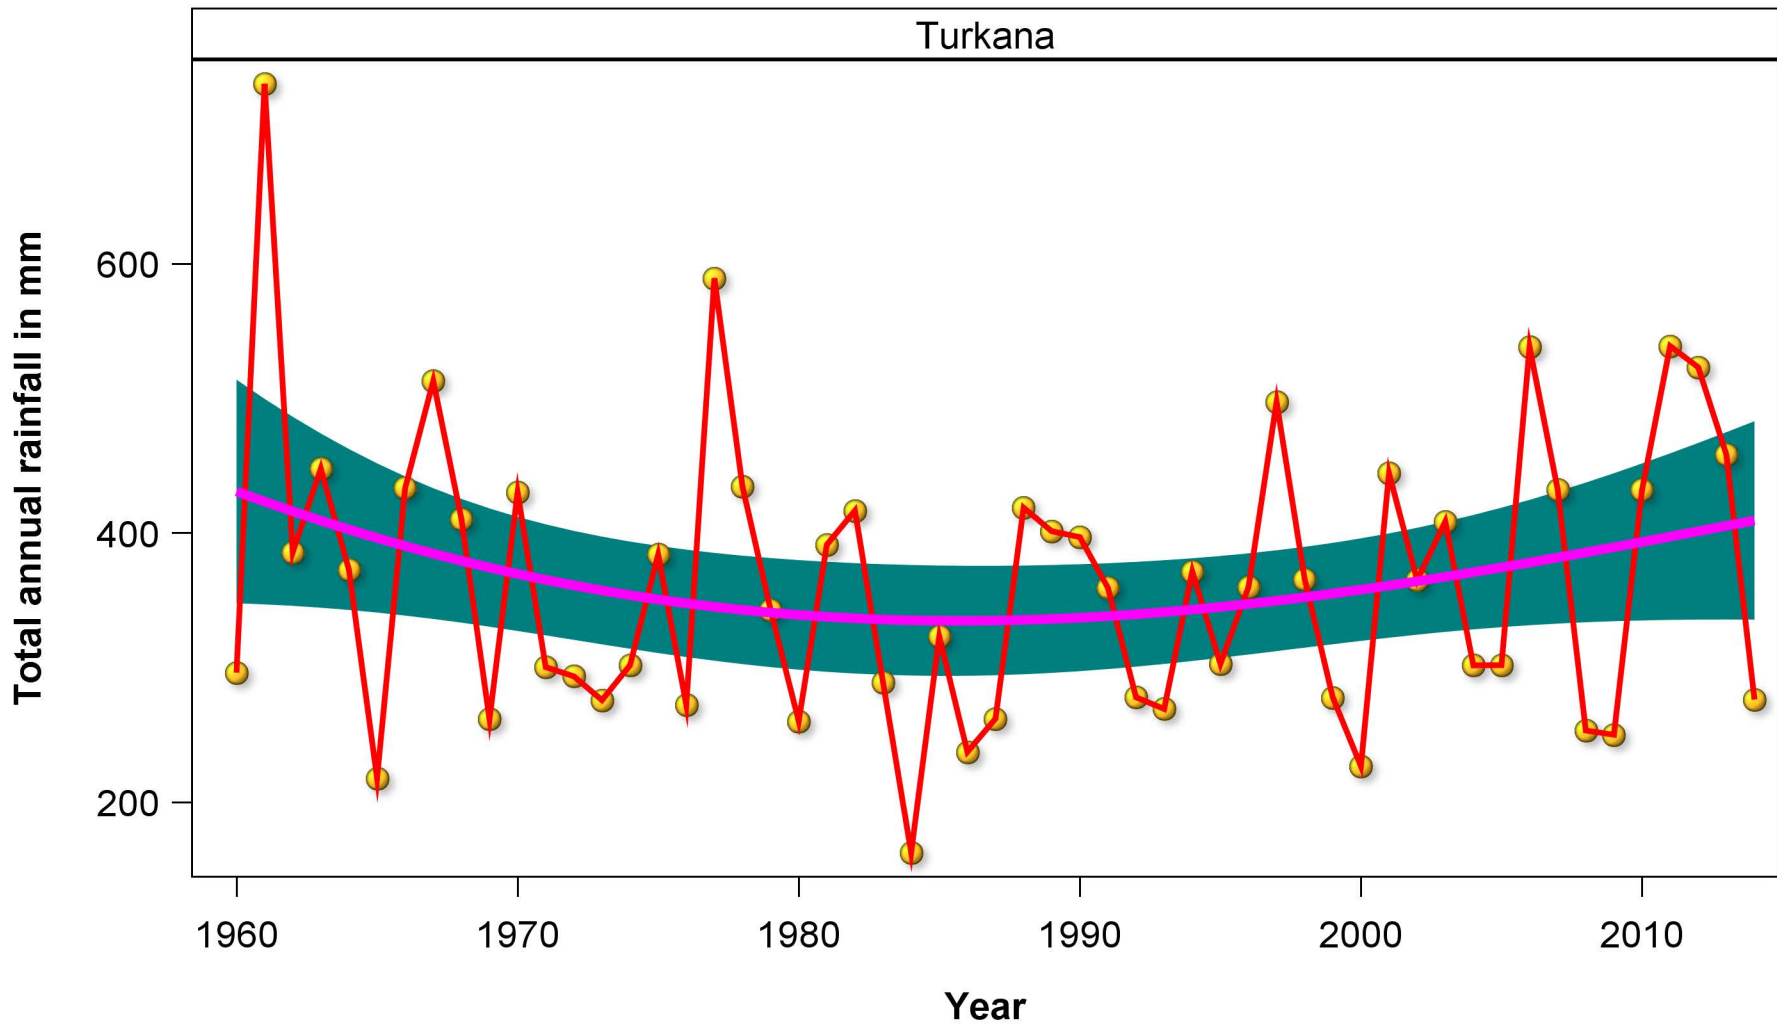

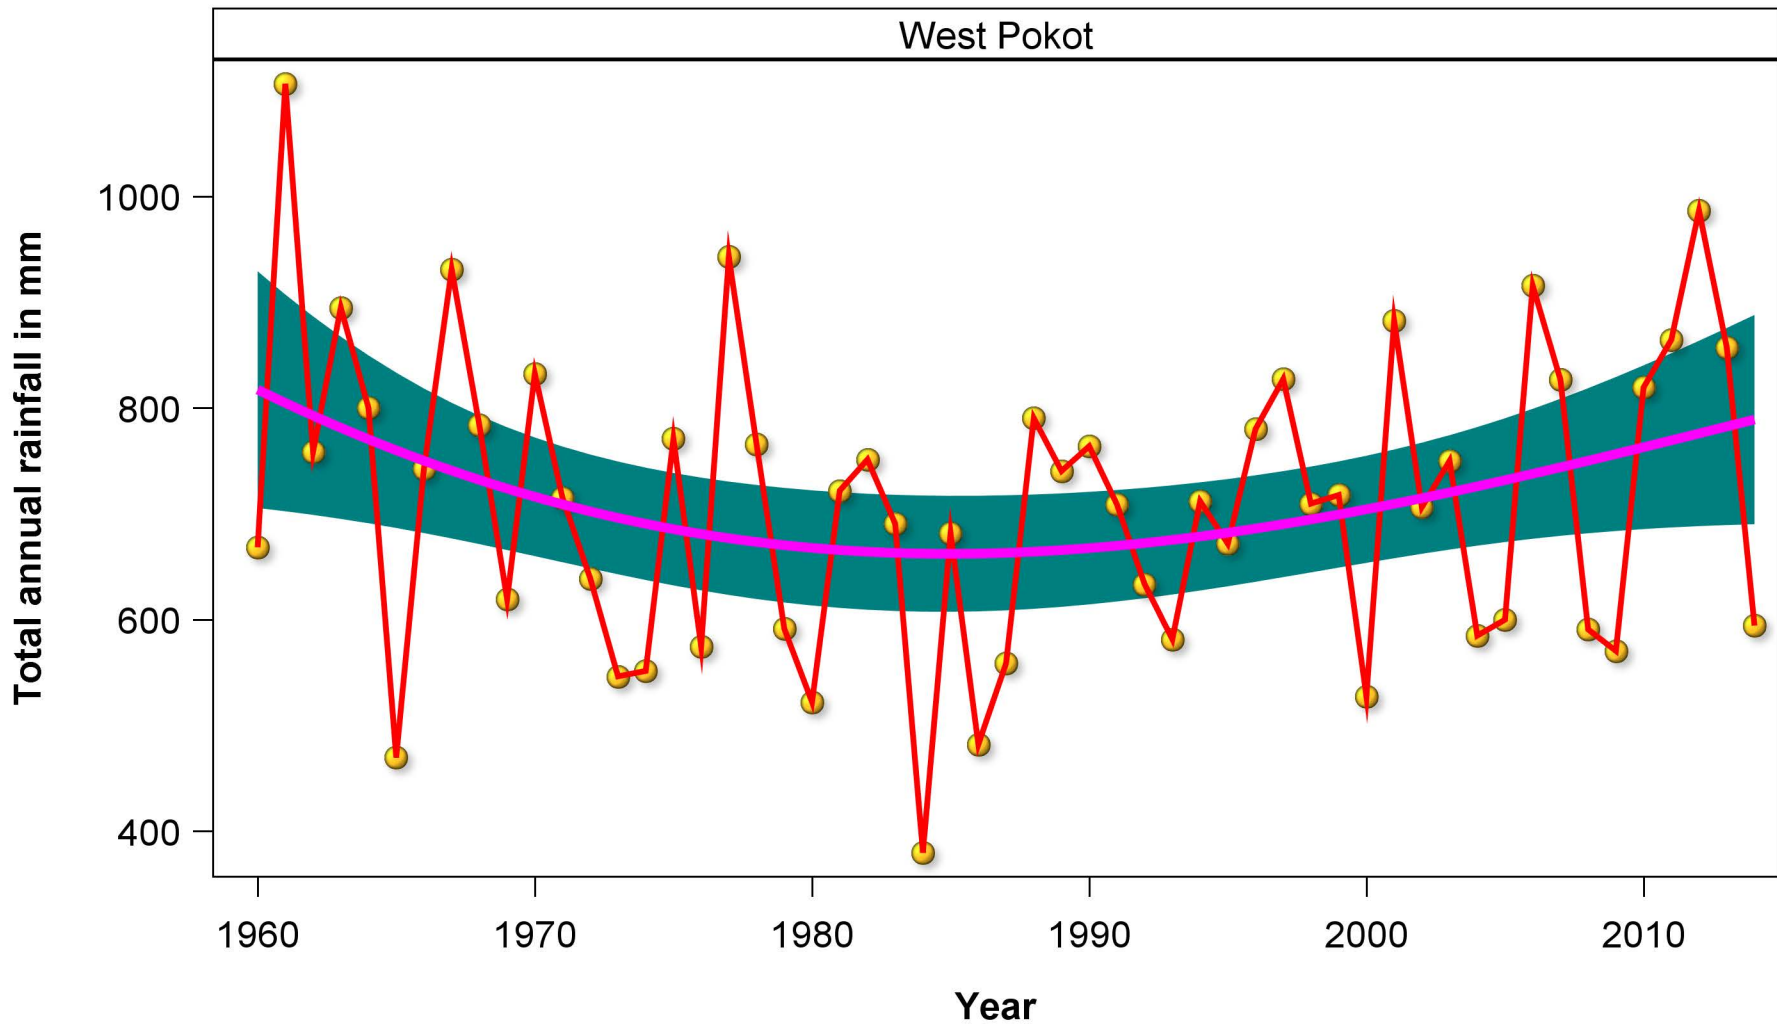

# Elgeyo Marakwet

Total annual rainfall in mm

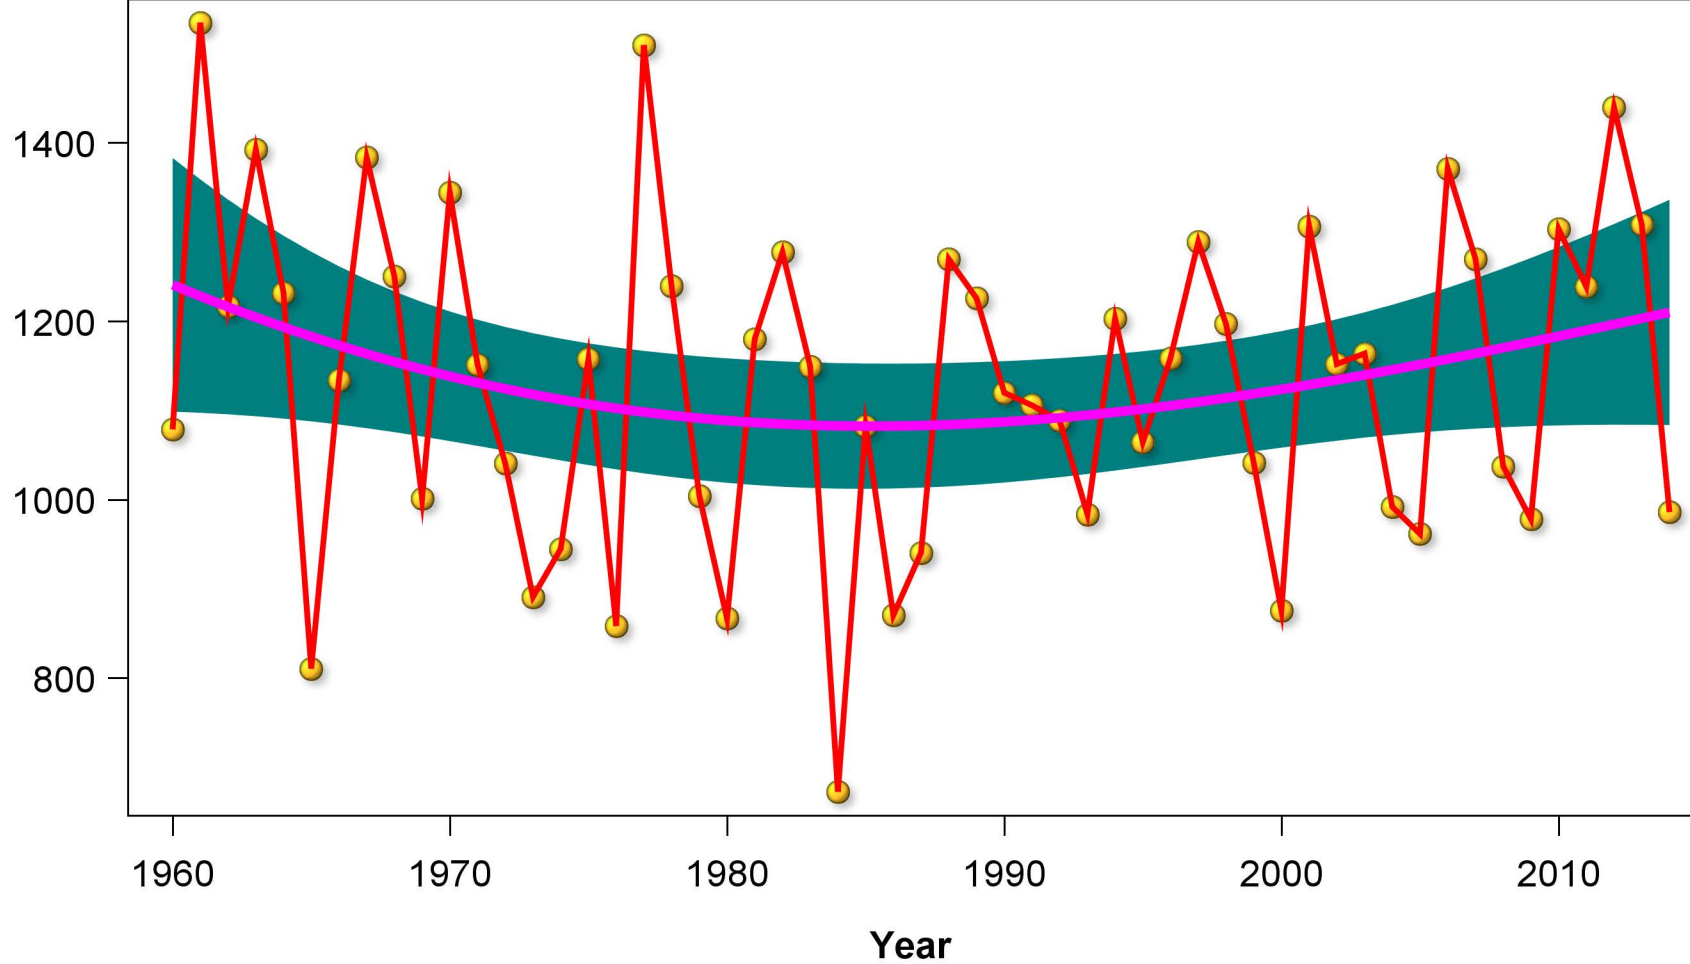

Supplement: S33 (10.1371/journal.pone.0163249.s033) [file journal.pone.0163249.s033]
