# Supplementary material for: Extreme Wildlife Declines and Concurrent Increase in Livestock Numbers in Kenya: What Are the Causes?
Source: PLOS journal article supplement (doi:10.1371/journal.pone.0163249), 2016-09-27

# Narok

Annual average maximum temperature (°C)

26  
25  
24

1960 1970 1980 1990 2000 2010

Year

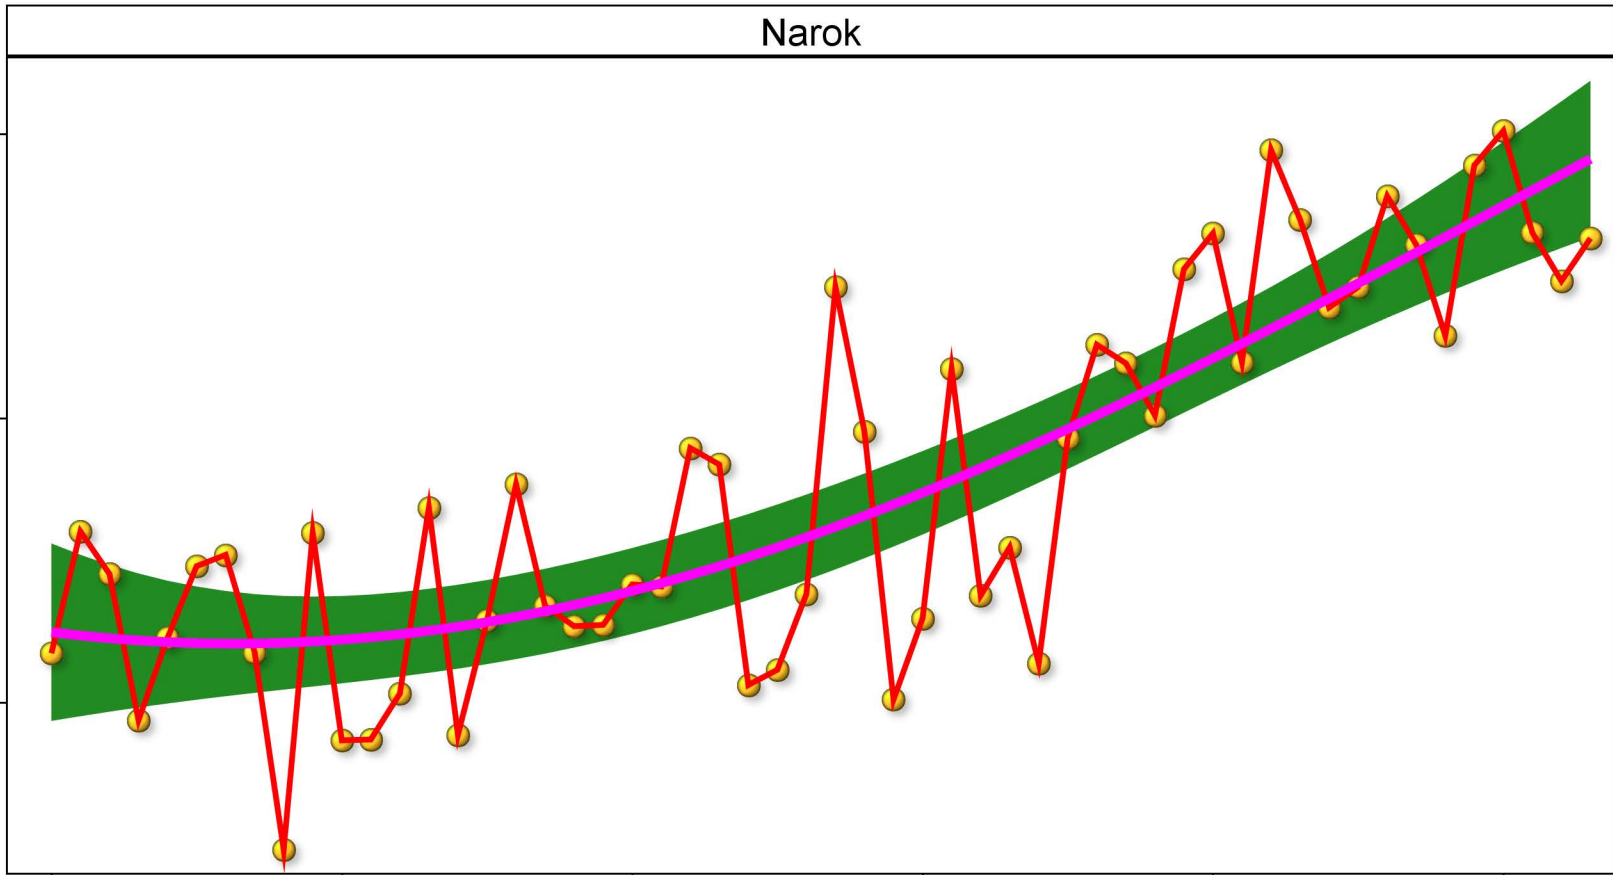

# Kajiado

Annual average maximum temperature (°C)

28  
27  
26

1960 1970 1980 1990 2000 2010

Year

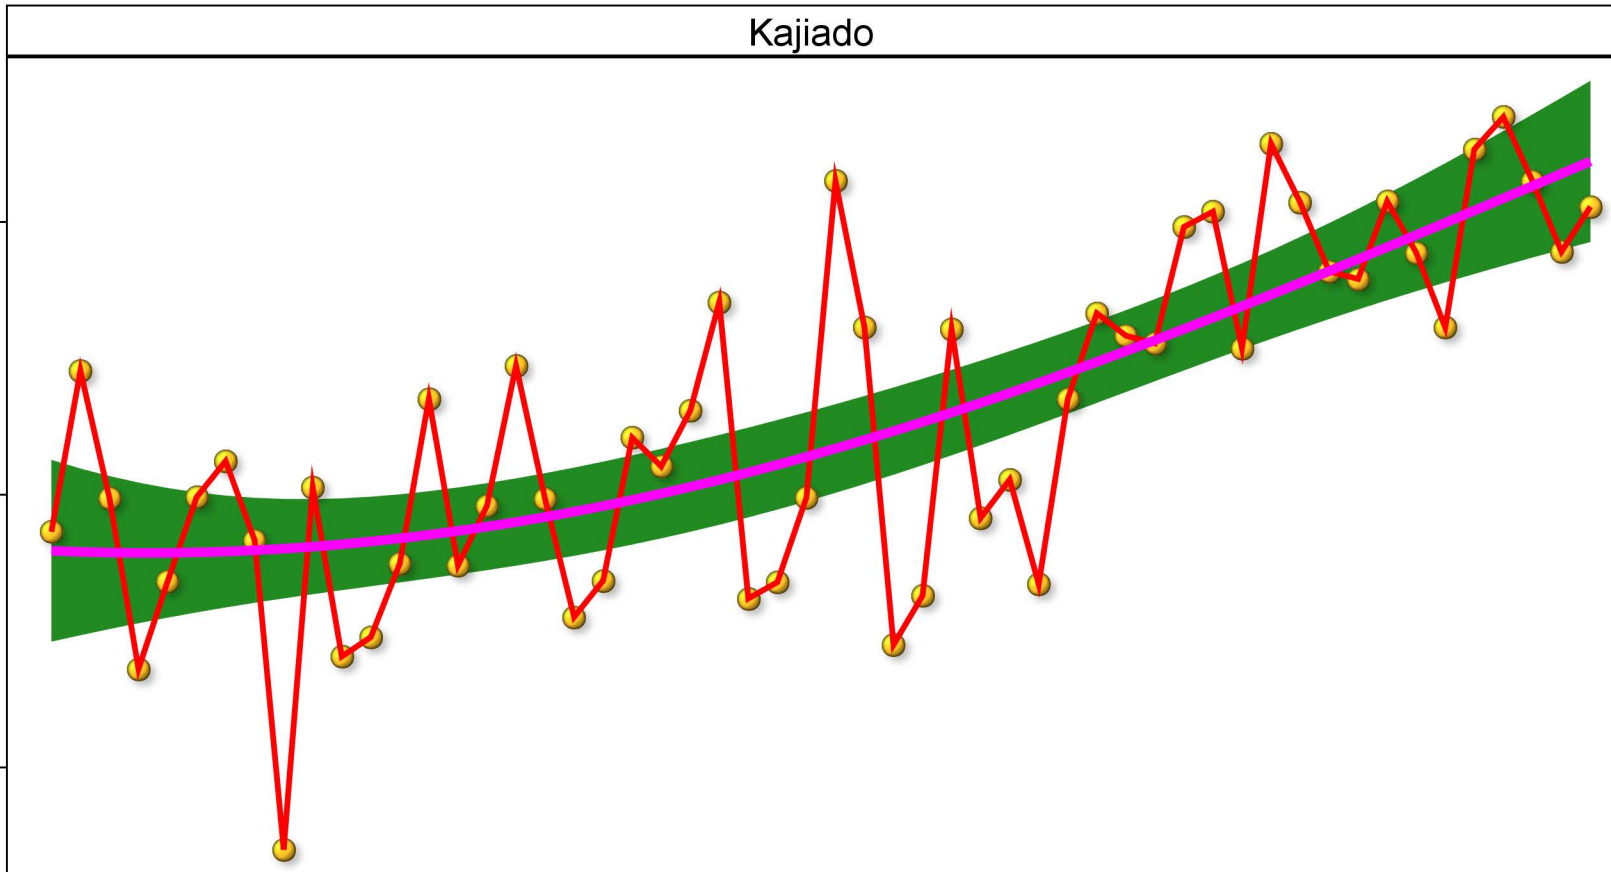

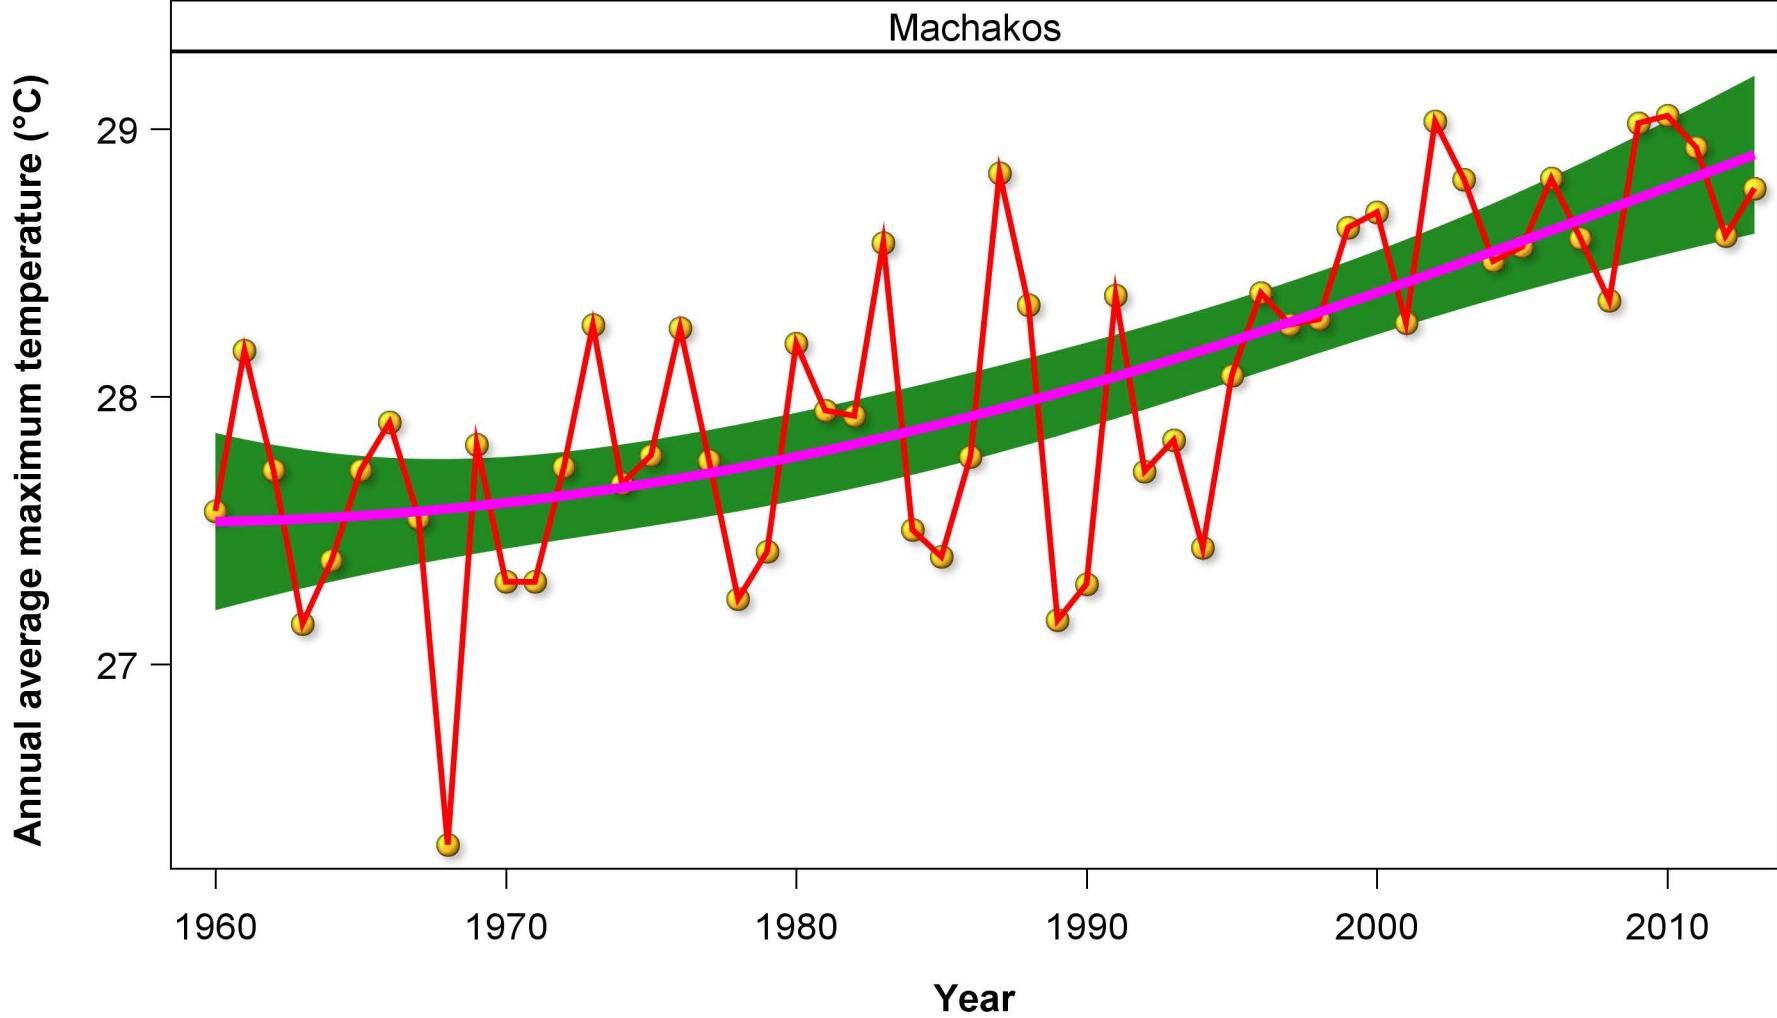

# Kitui

Annual average maximum temperature (°C)

32  
31  
30

1960 1970 1980 1990 2000 2010

Year

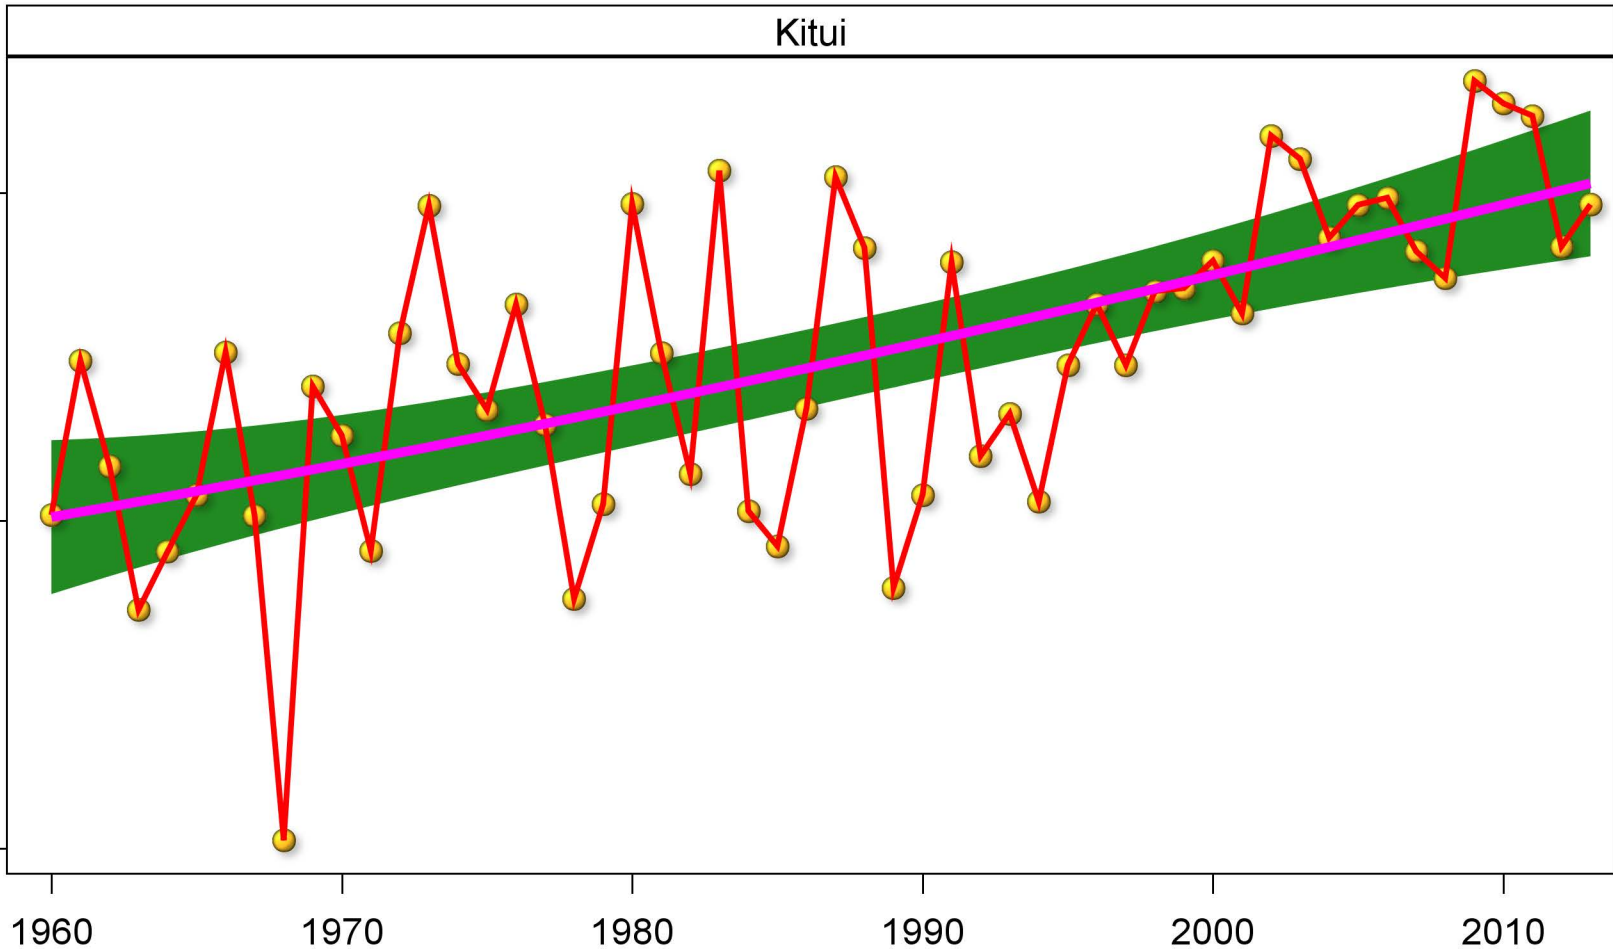

# Taita Taveta

Annual average maximum temperature (°C)

Year

30.5  
30.0  
29.5  
29.0

1960

1970

1980

1990

2000

2010

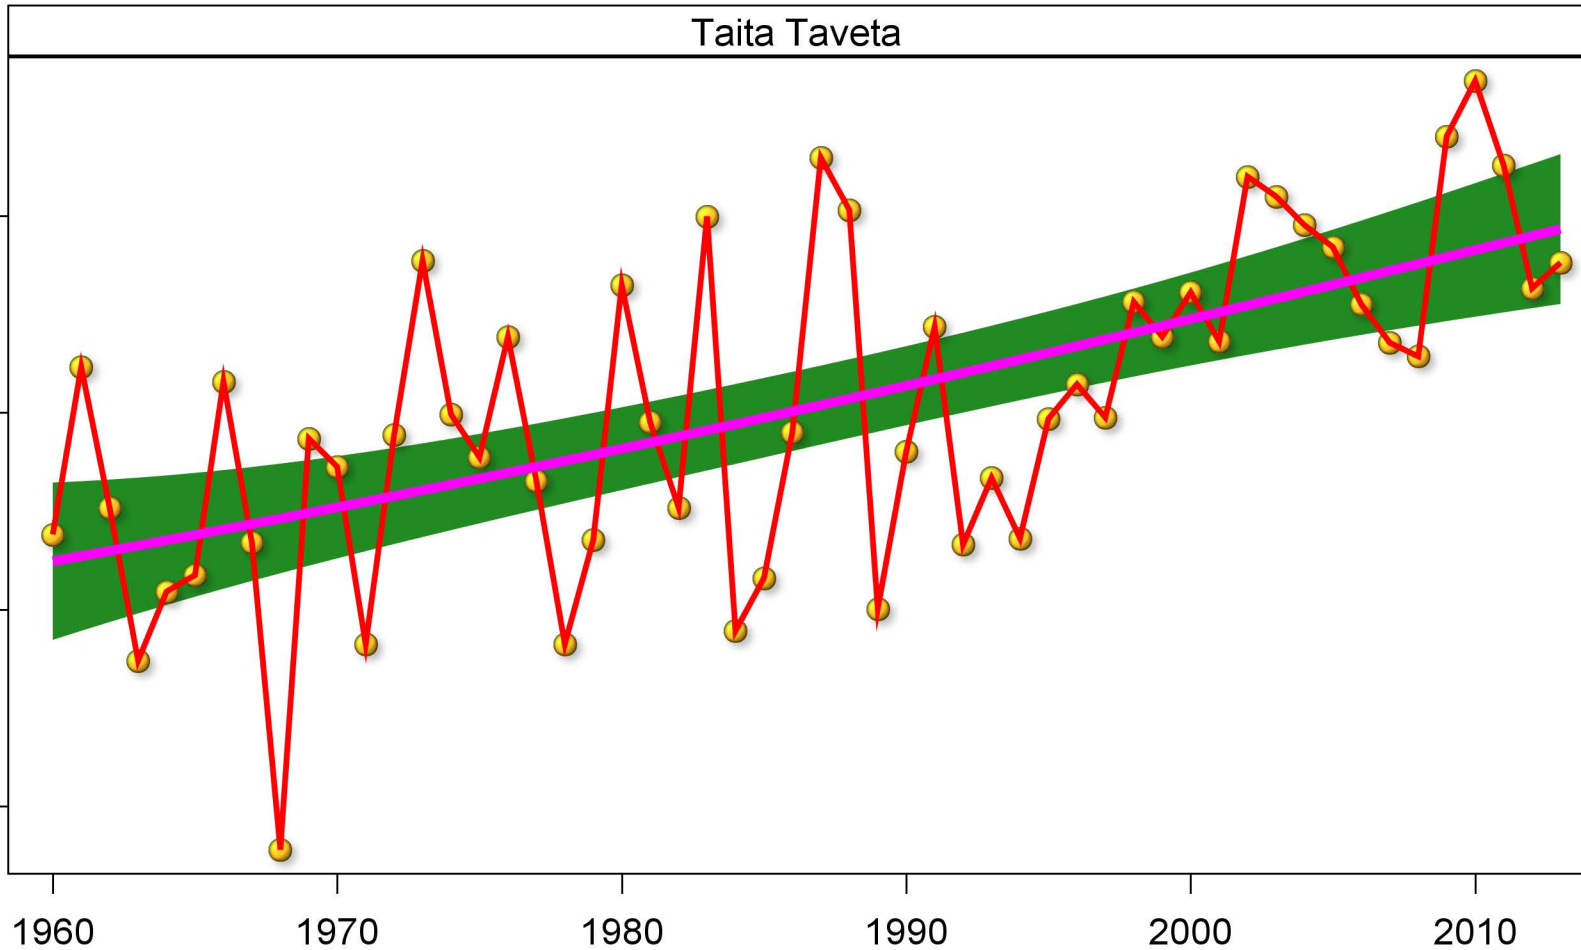

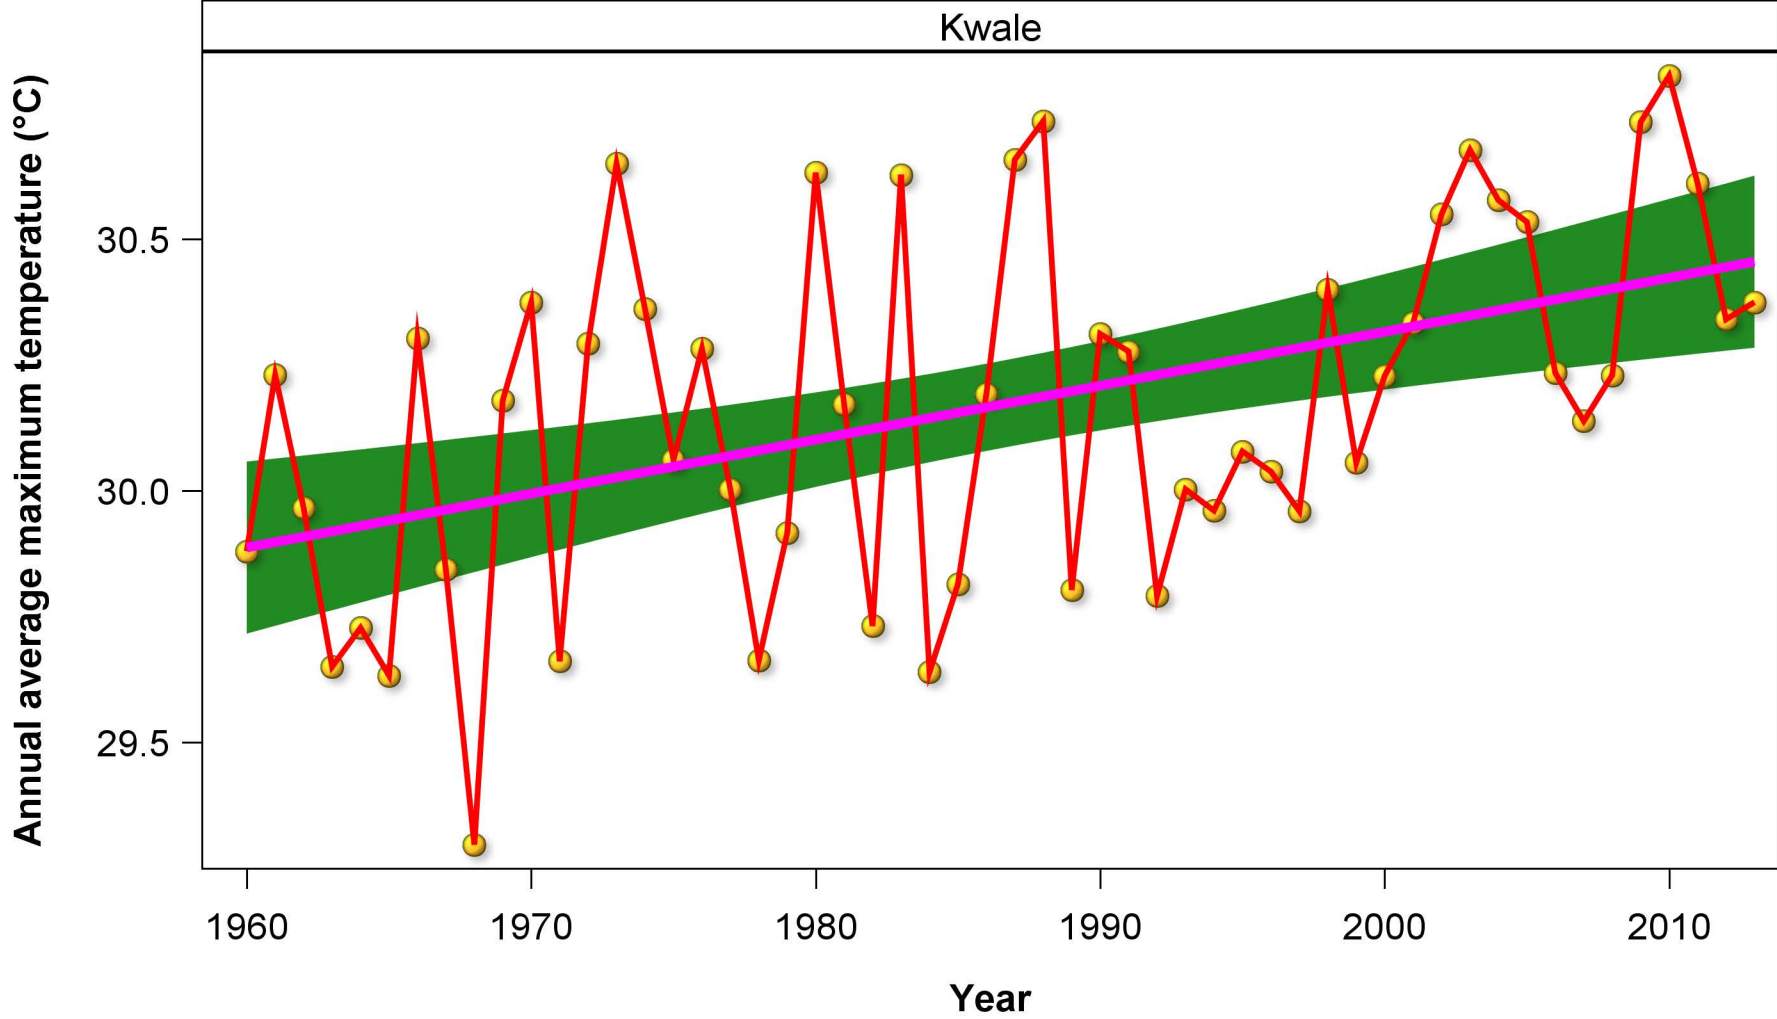

# Kilifi

Annual average maximum temperature (°C)

31.0

30.5

30.0

1960

1970

1980

1990

2000

2010

Year

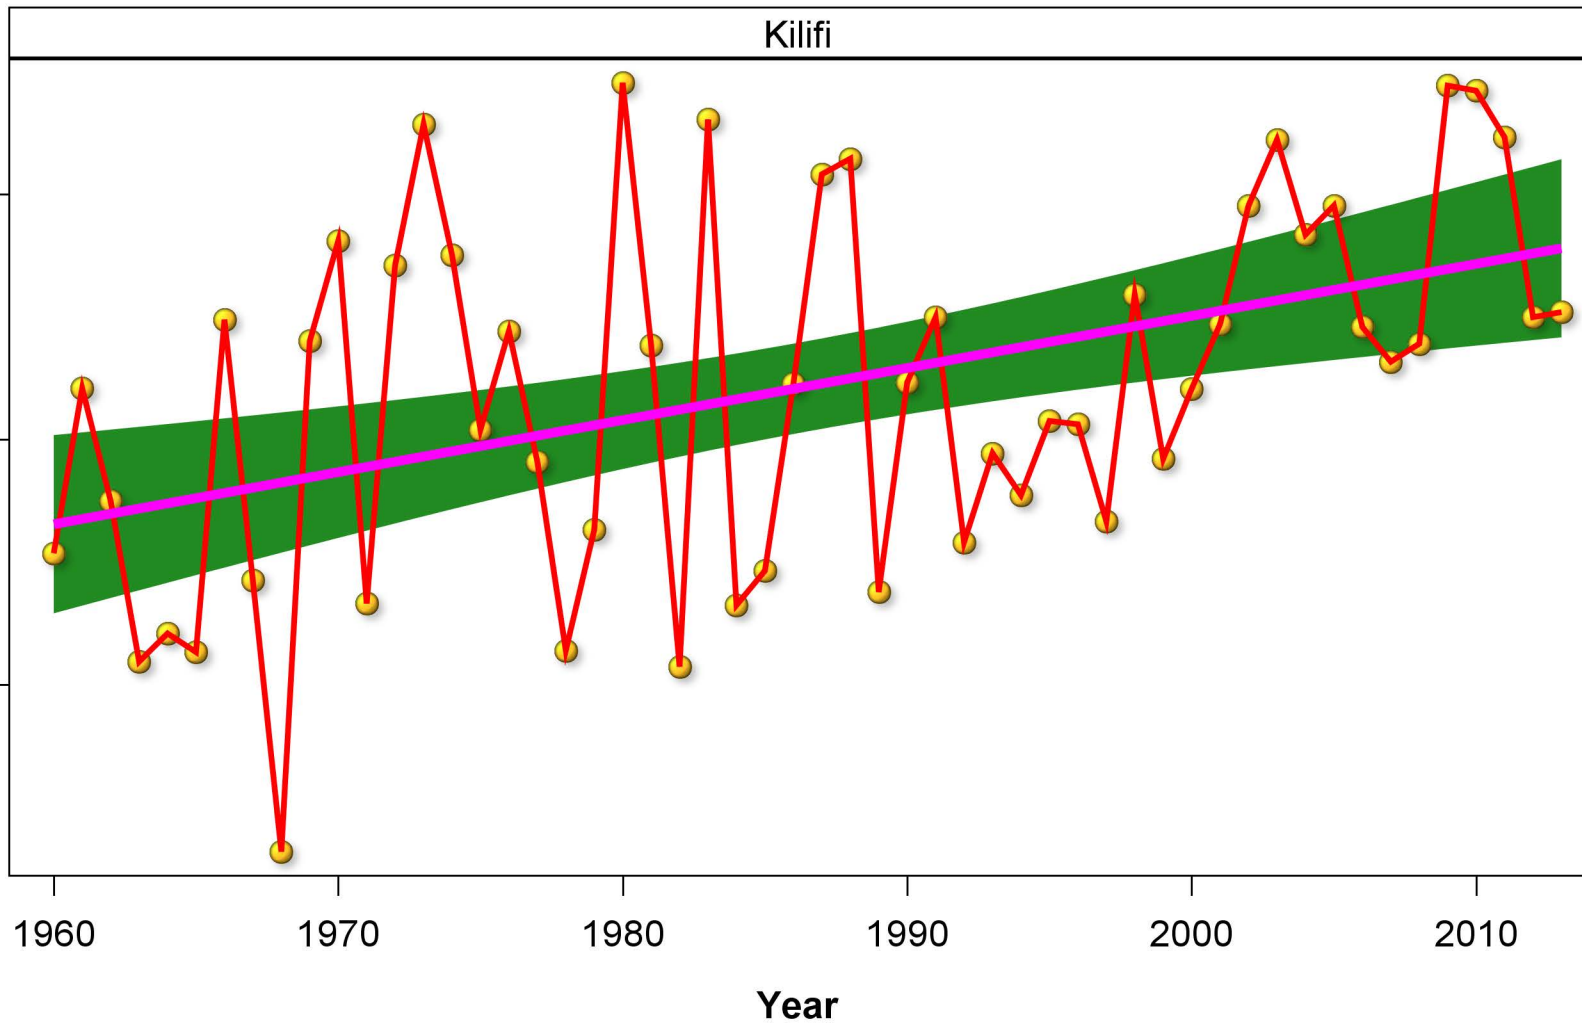

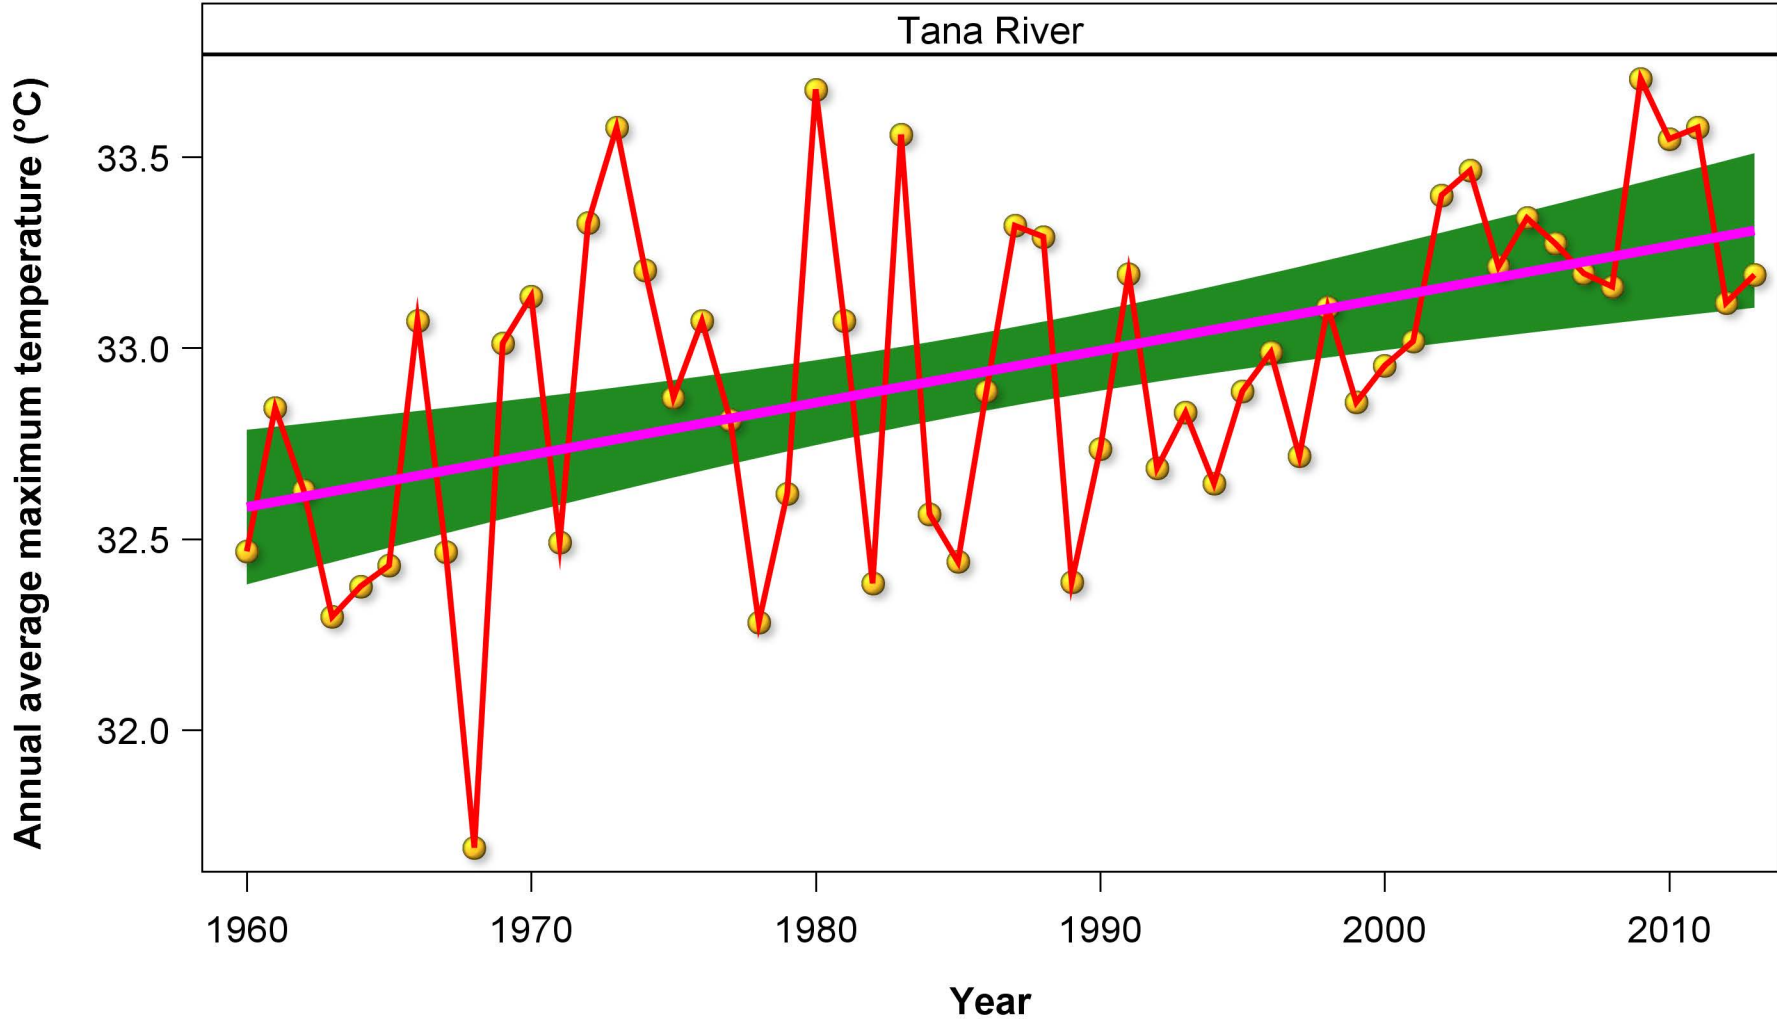



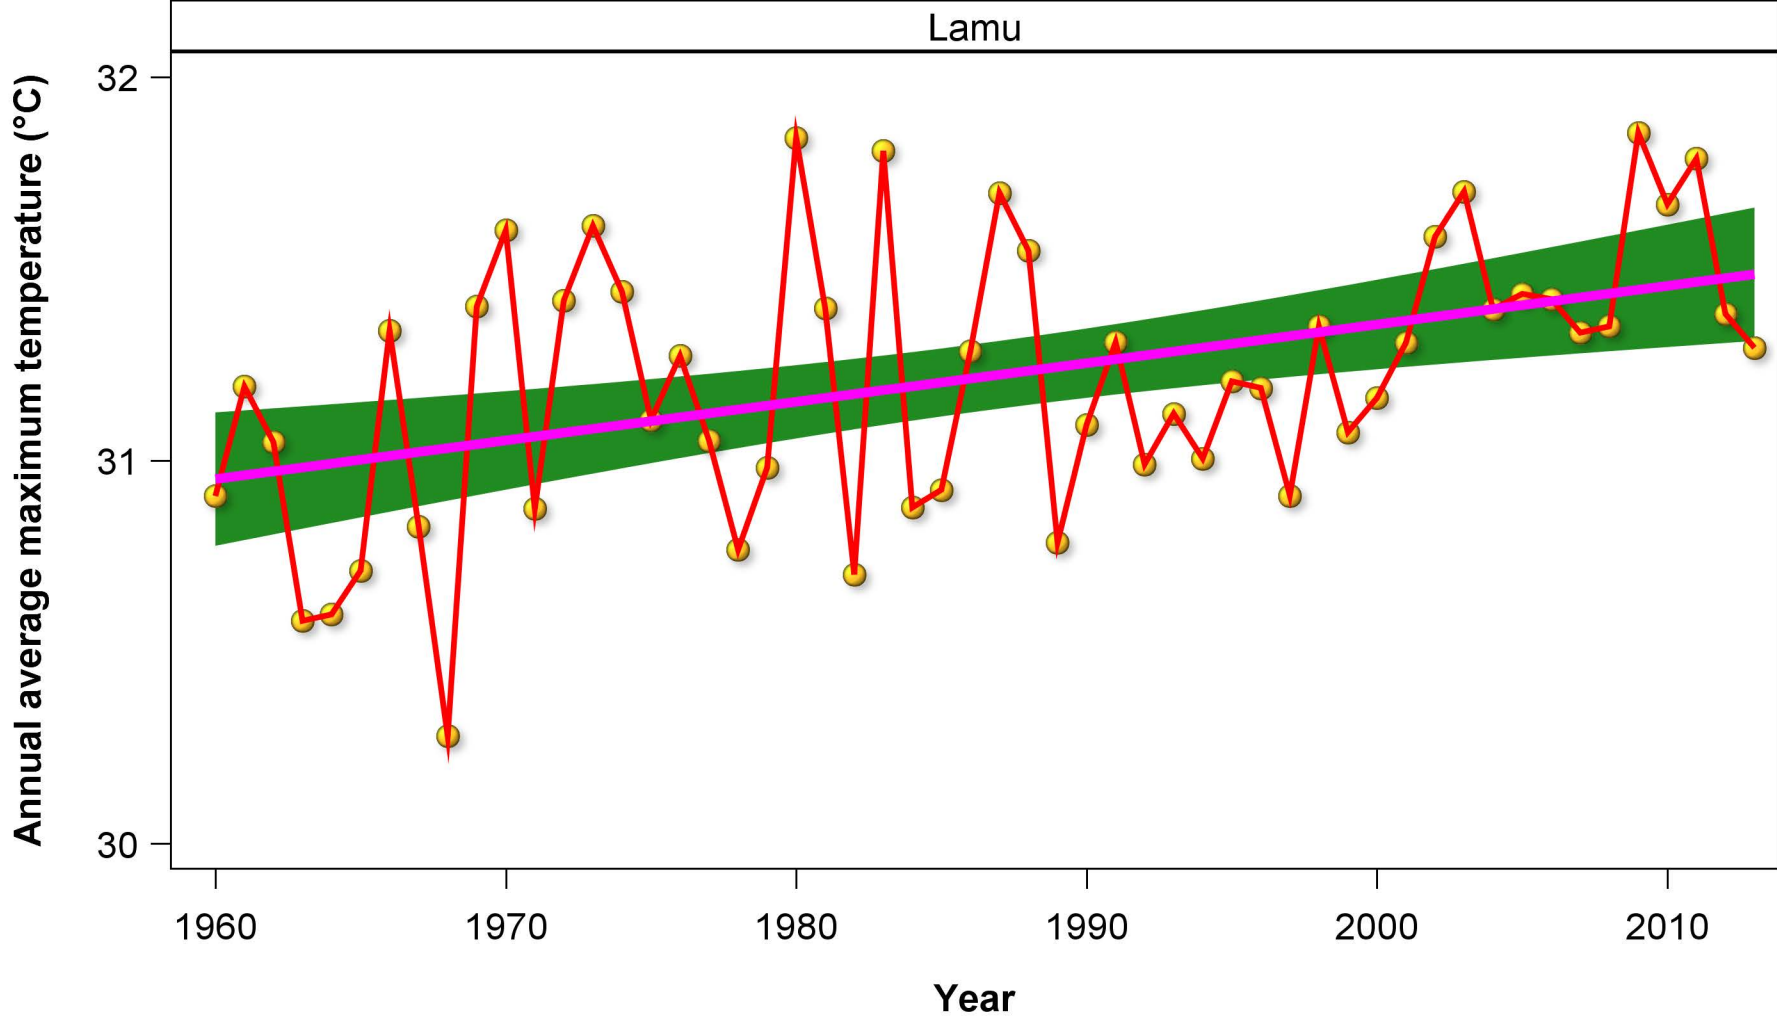

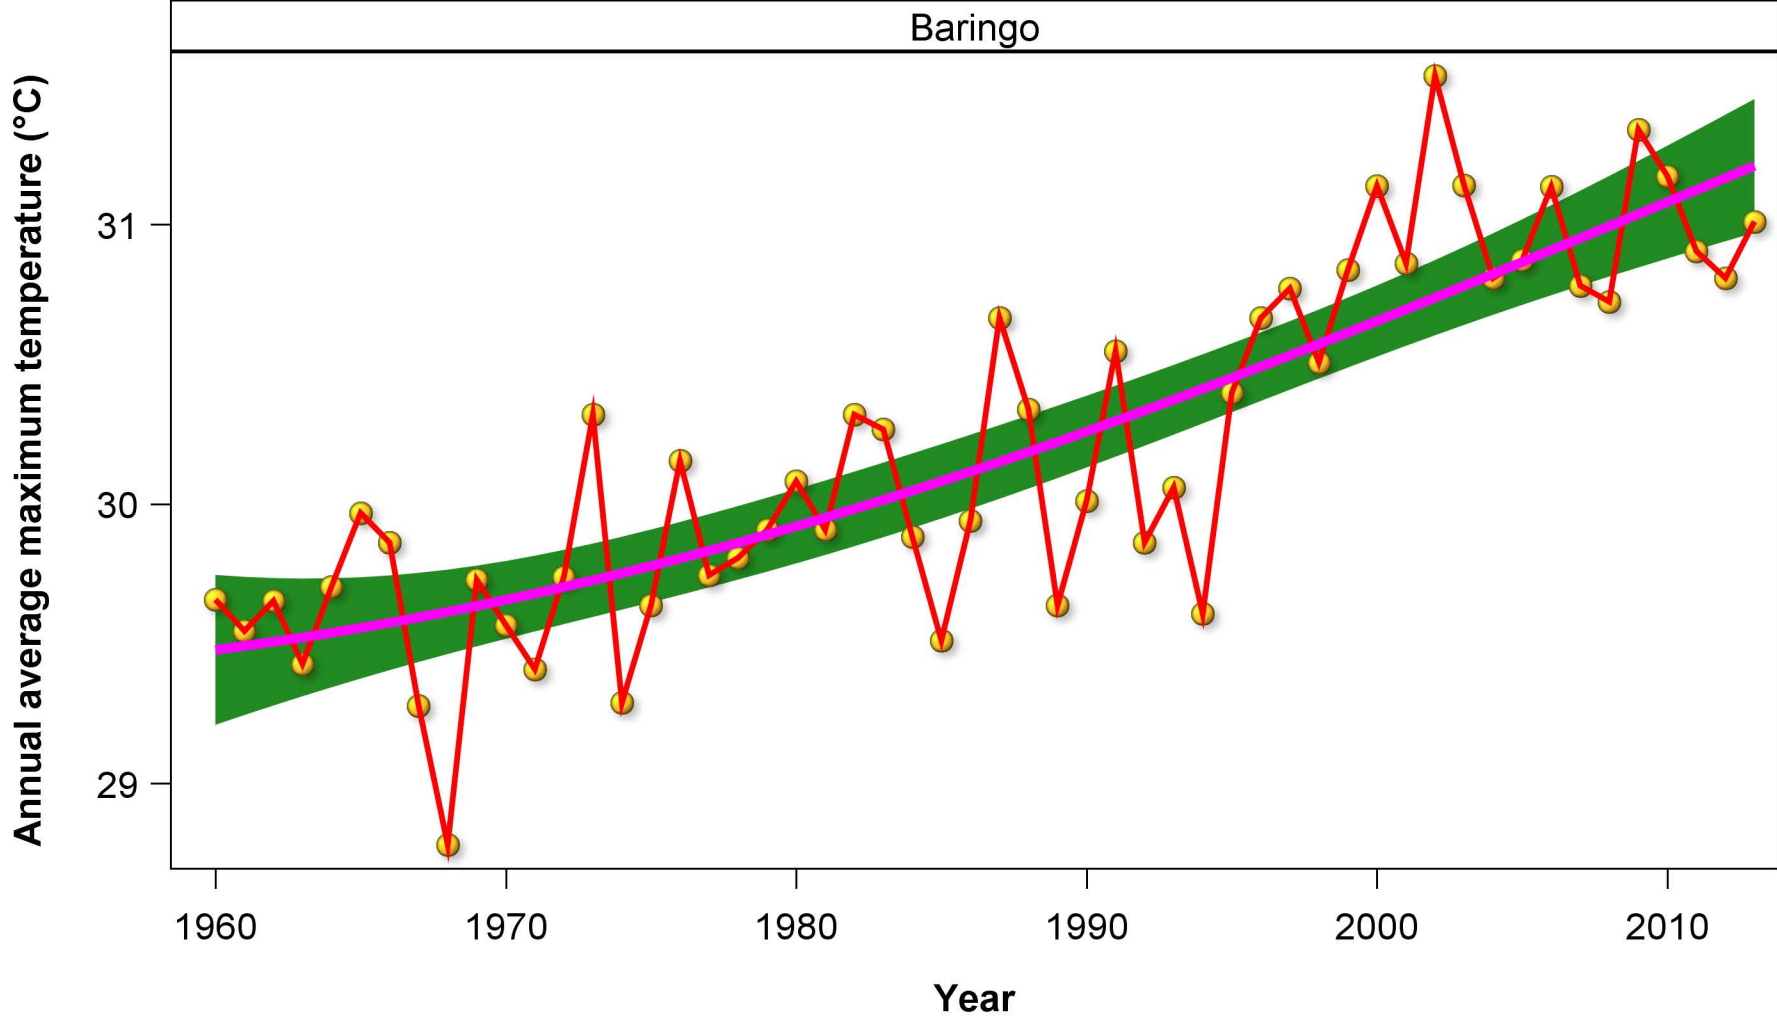

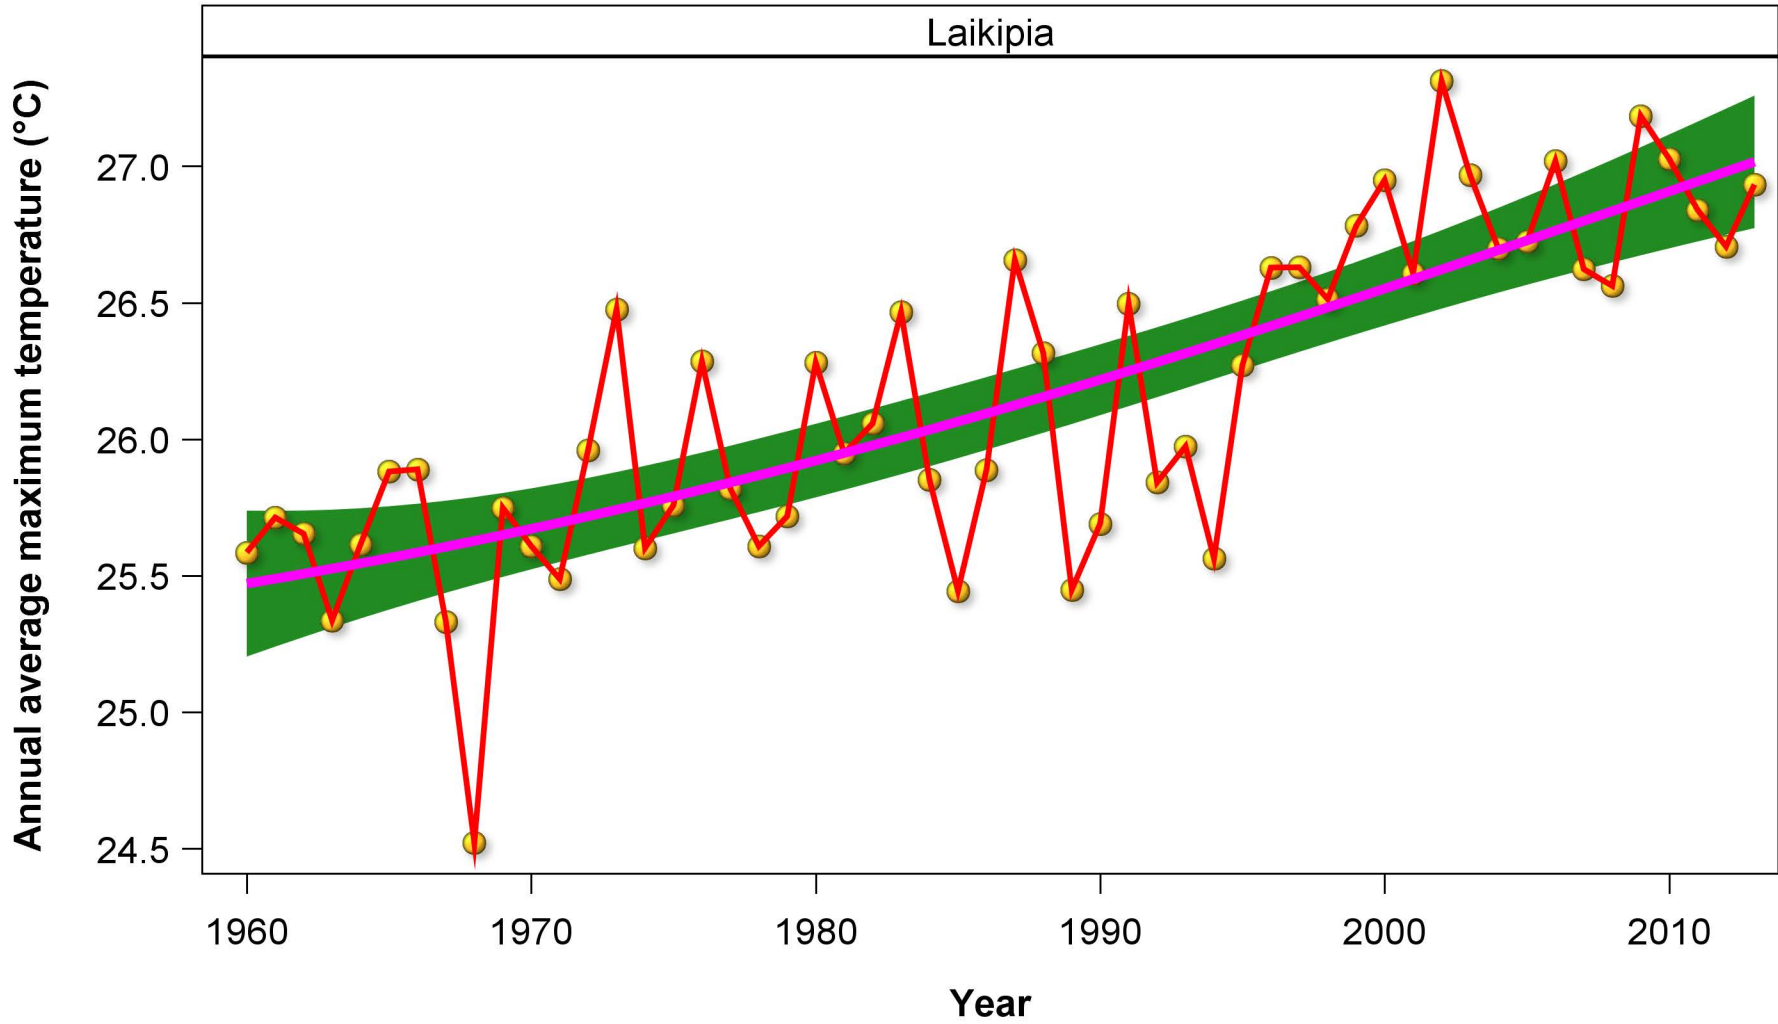

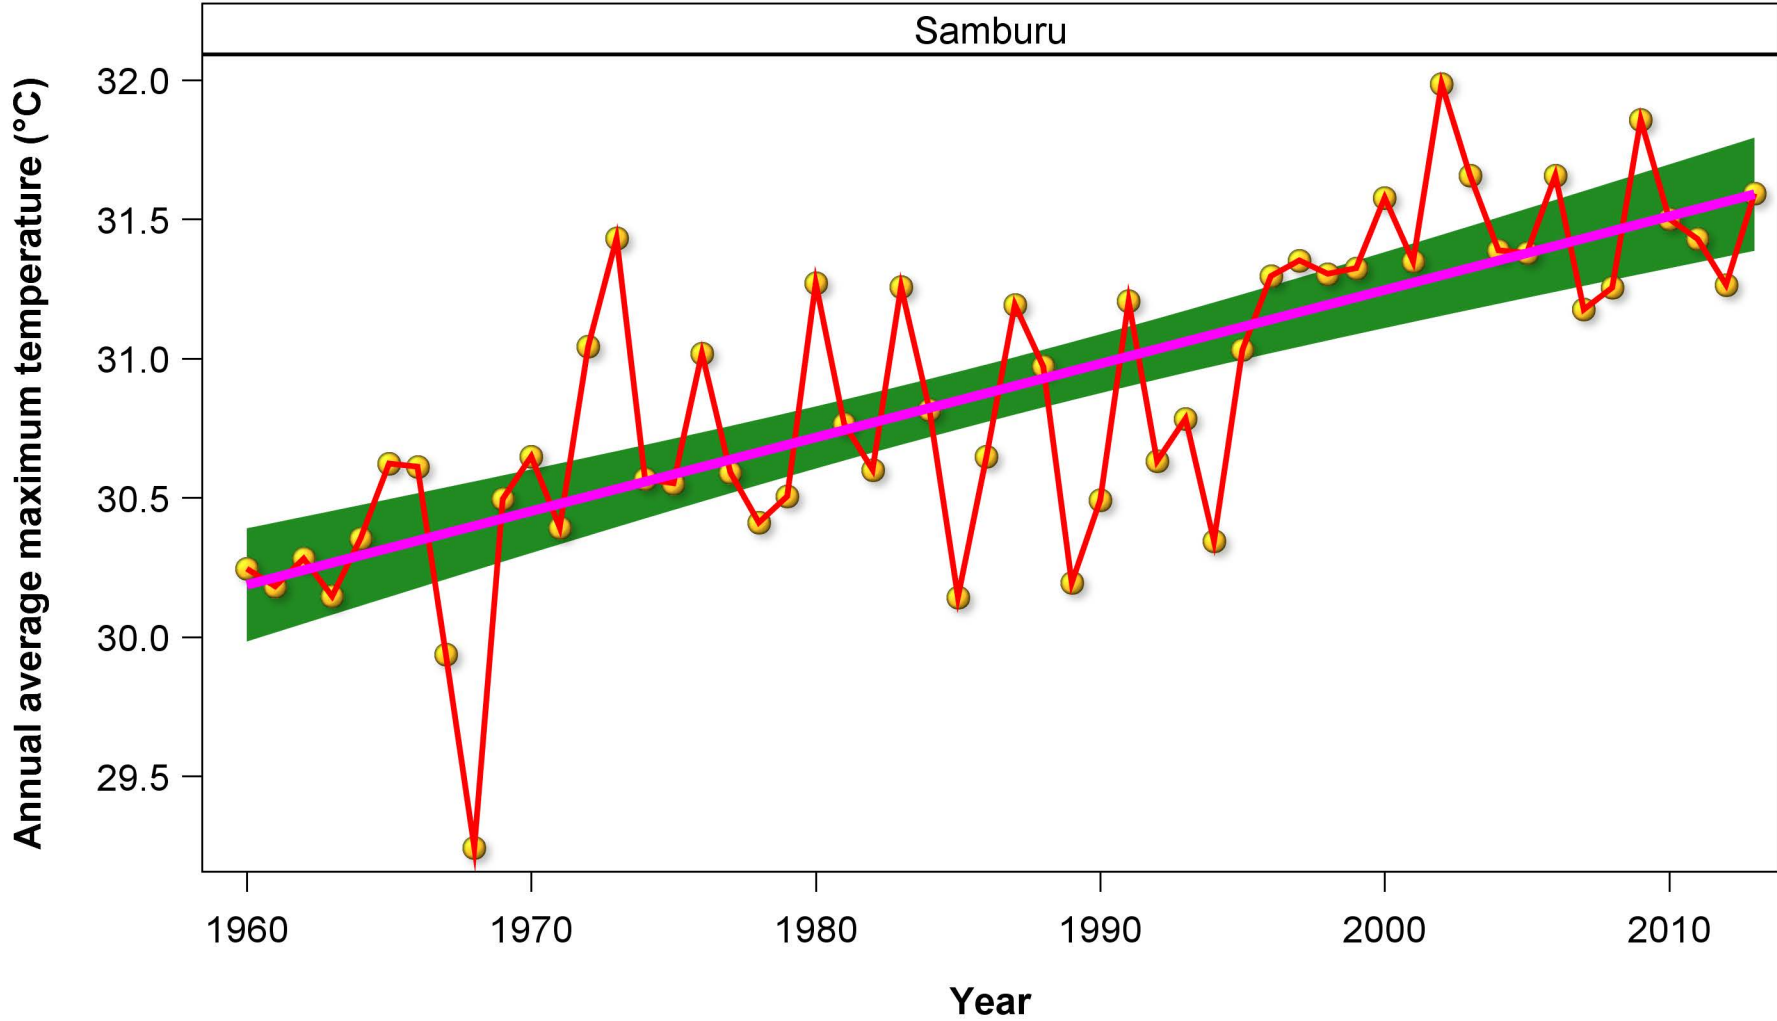

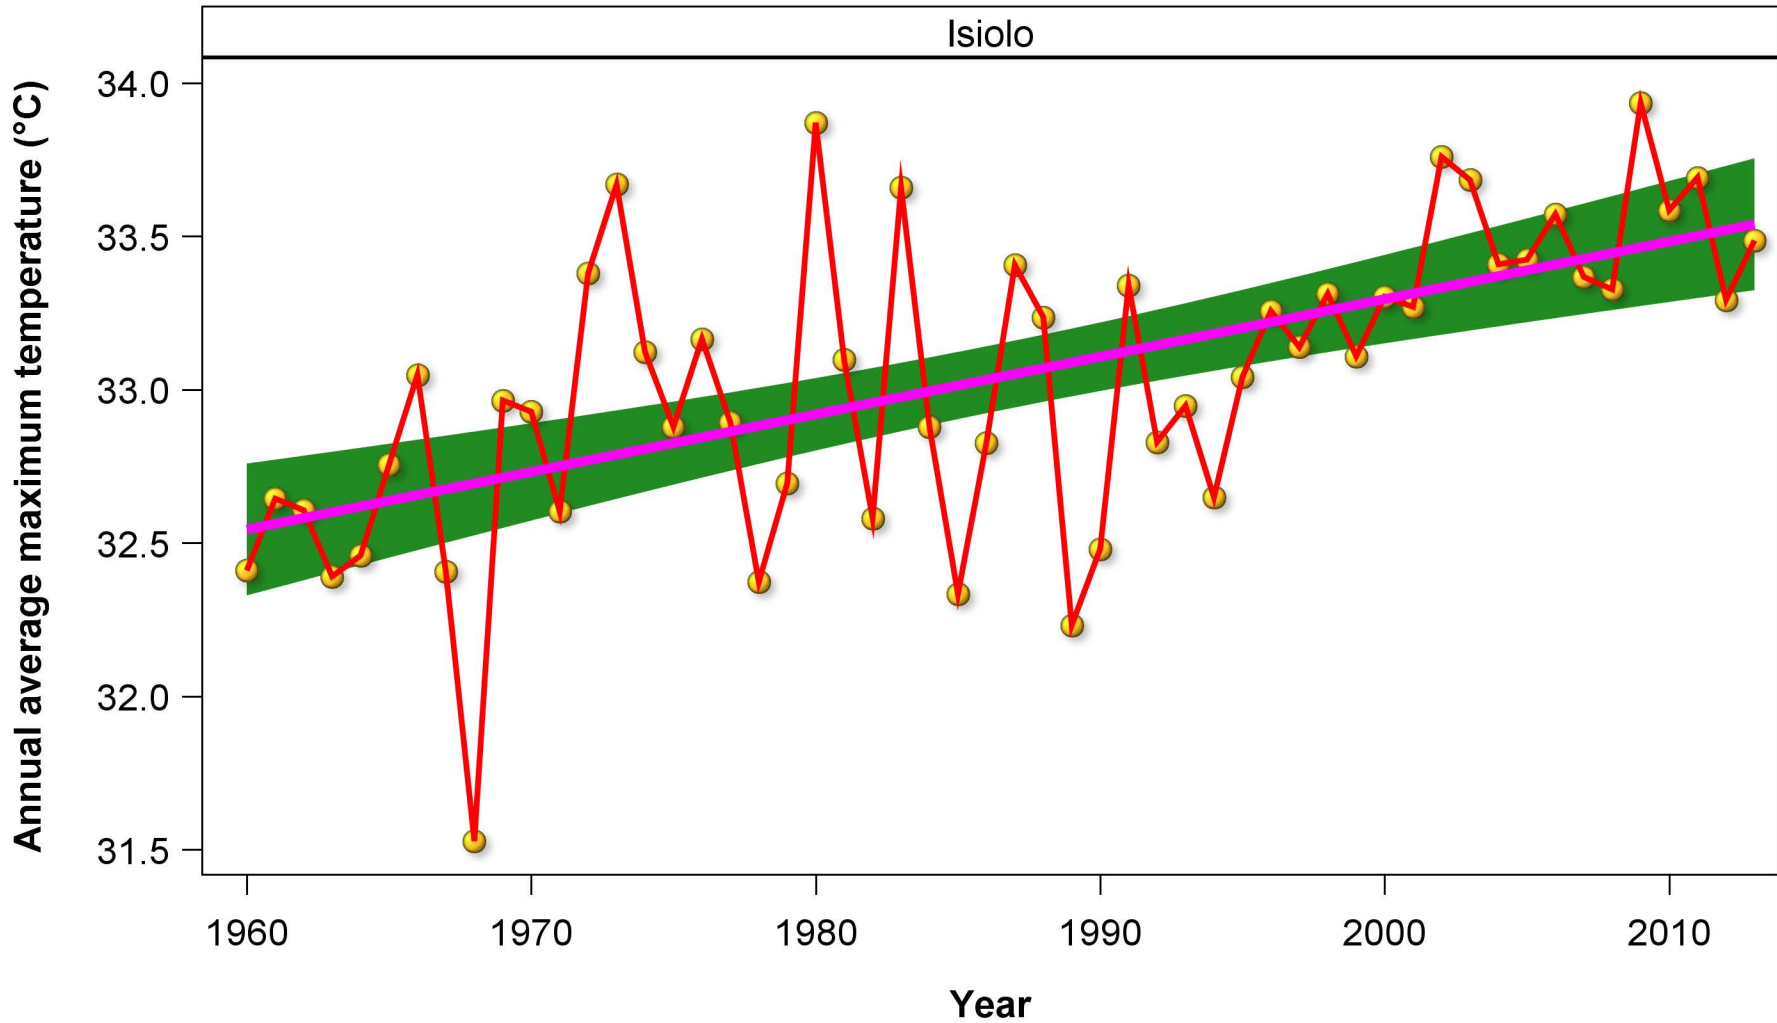

# Garissa

Annual average maximum temperature (°C)

34.0  
33.5  
33.0  
32.5  
32.0

1960

1970

1980

1990

2000

2010

Year

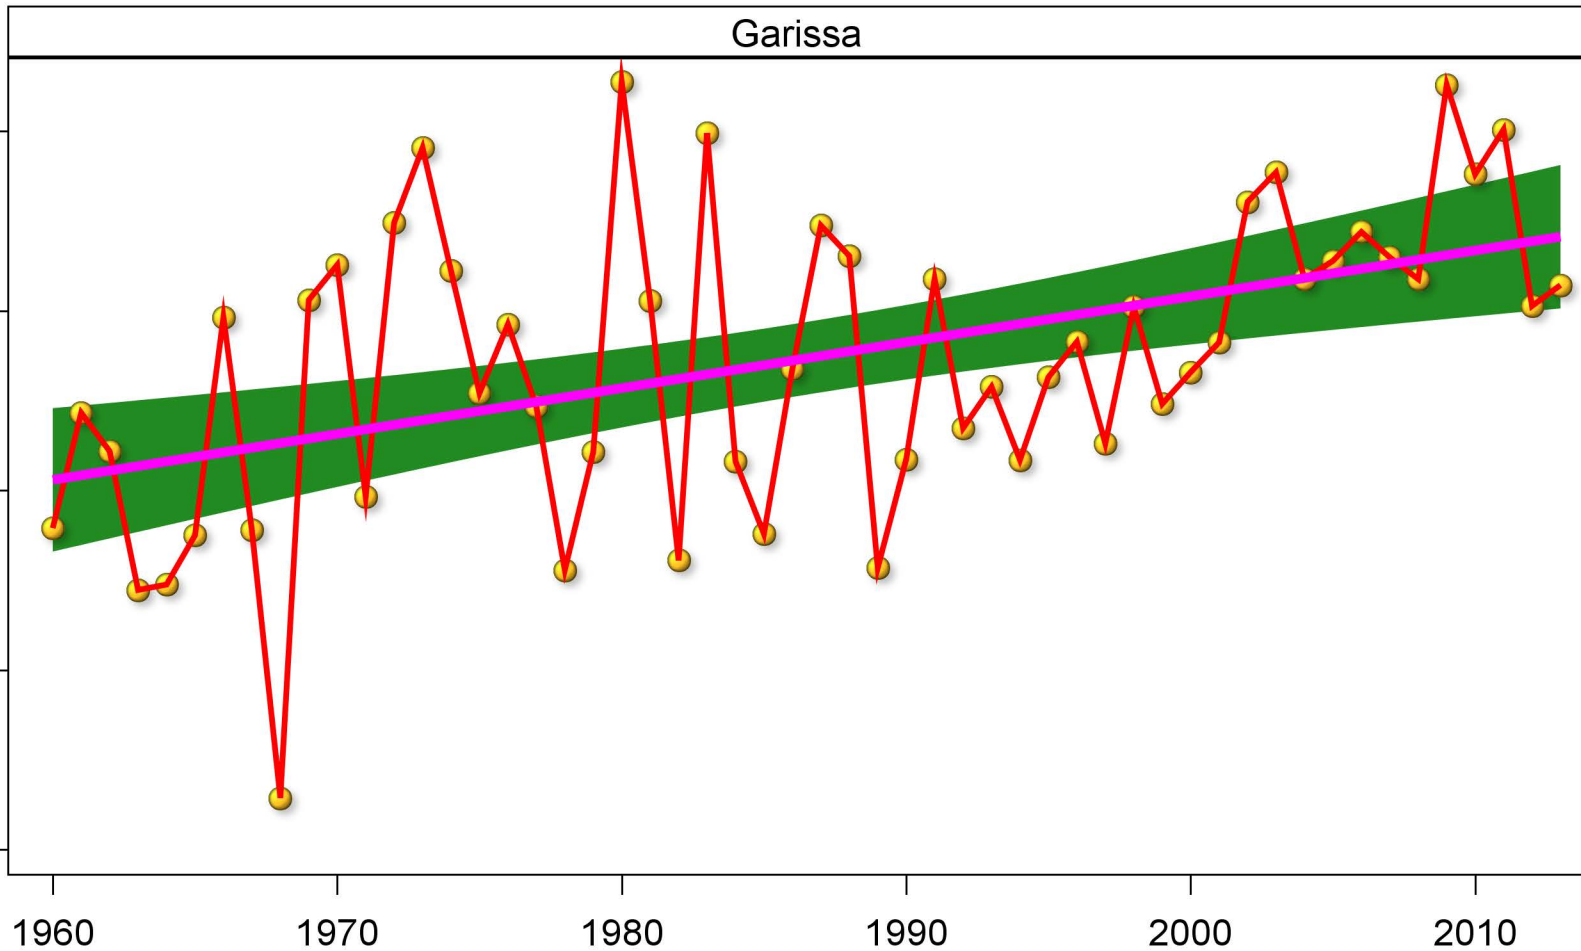

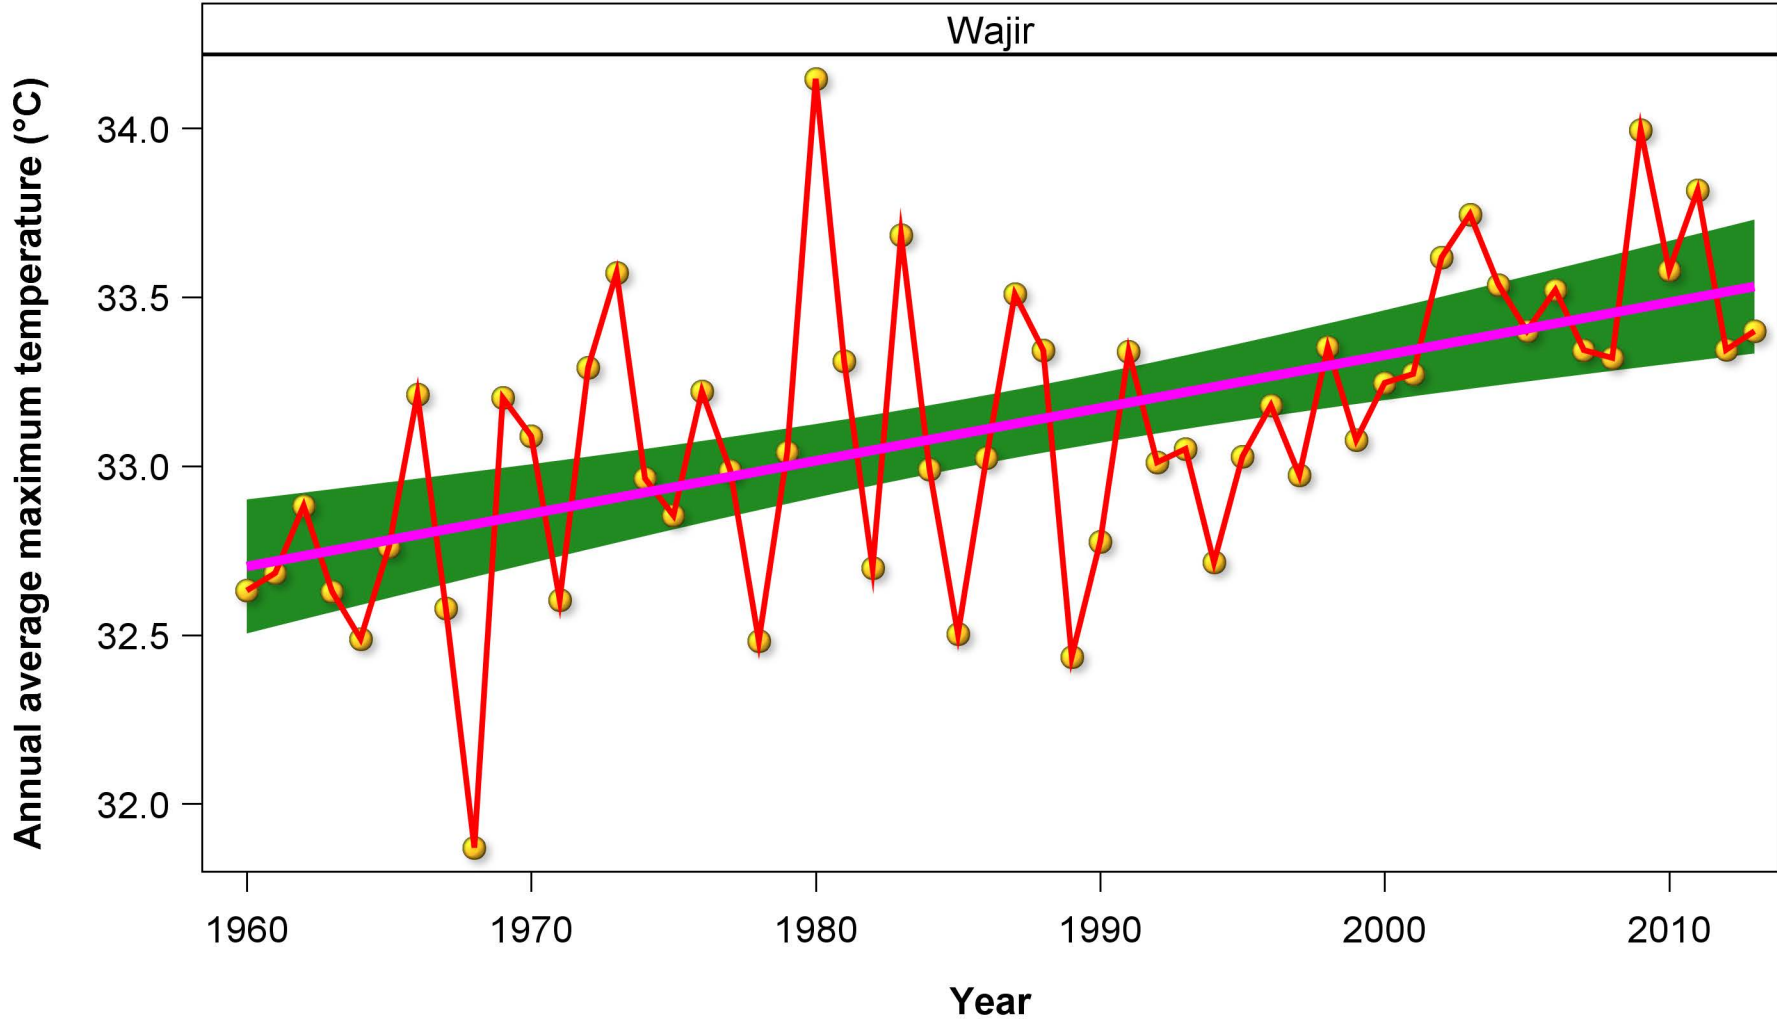

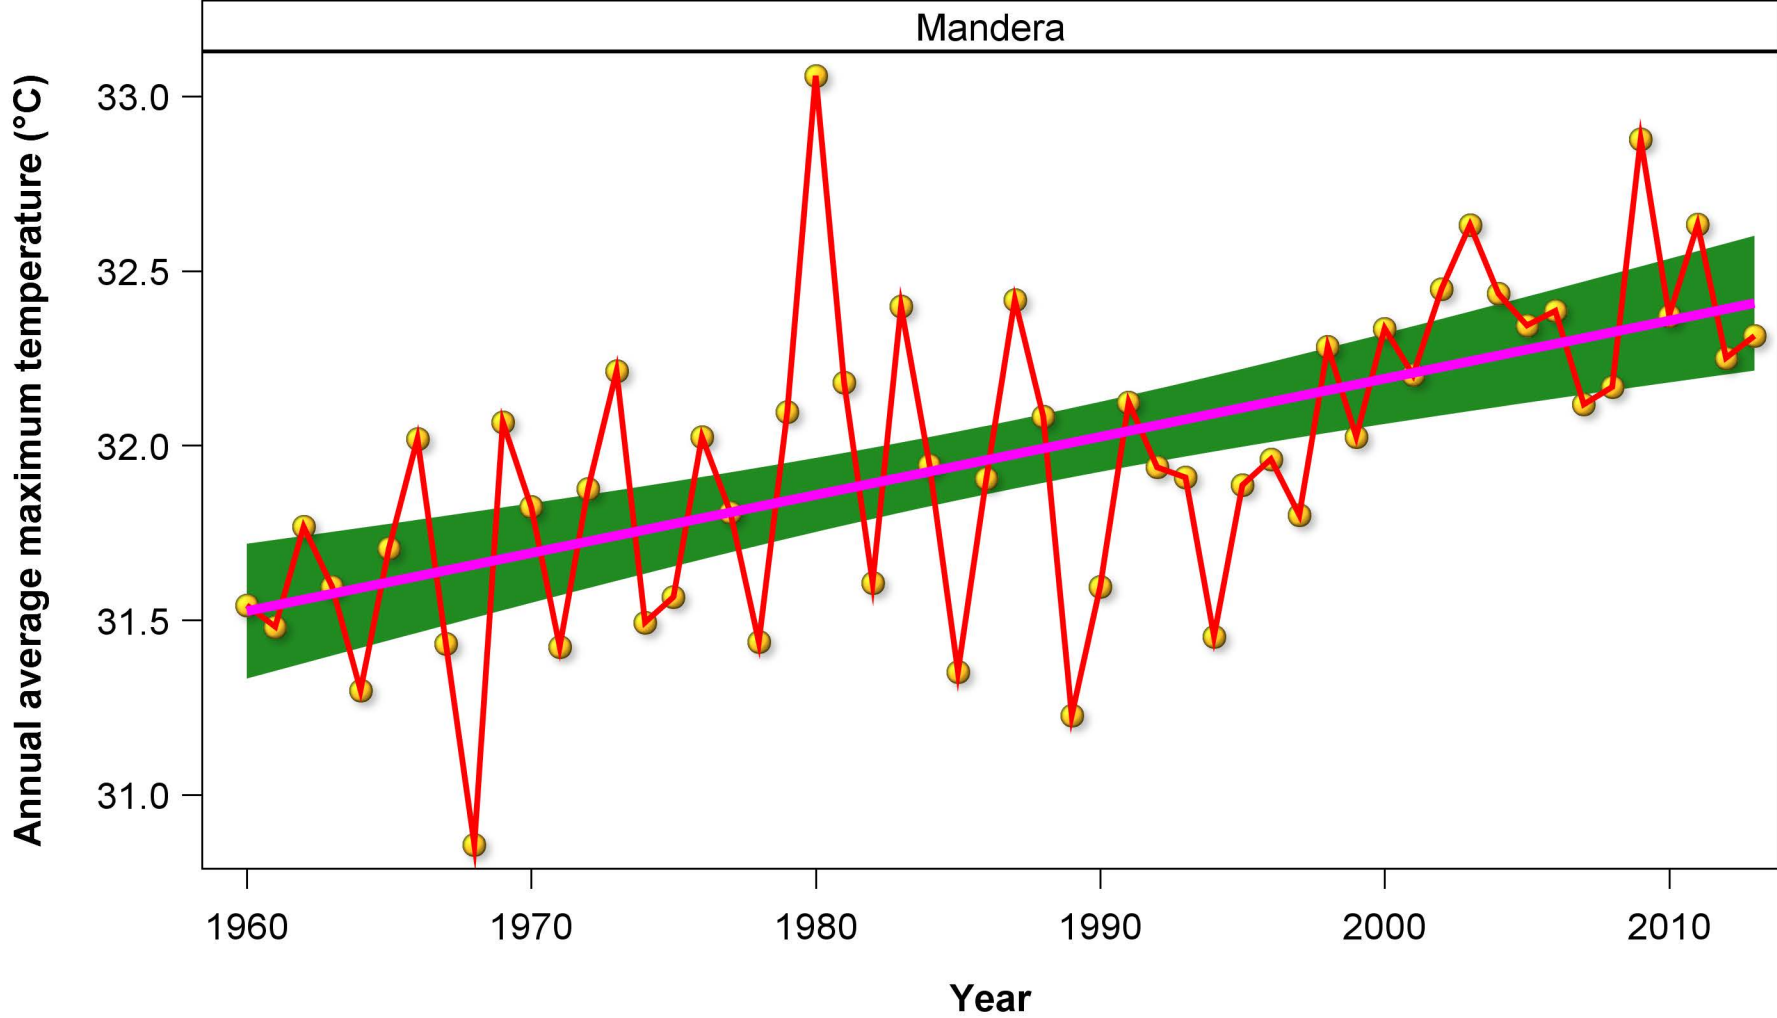



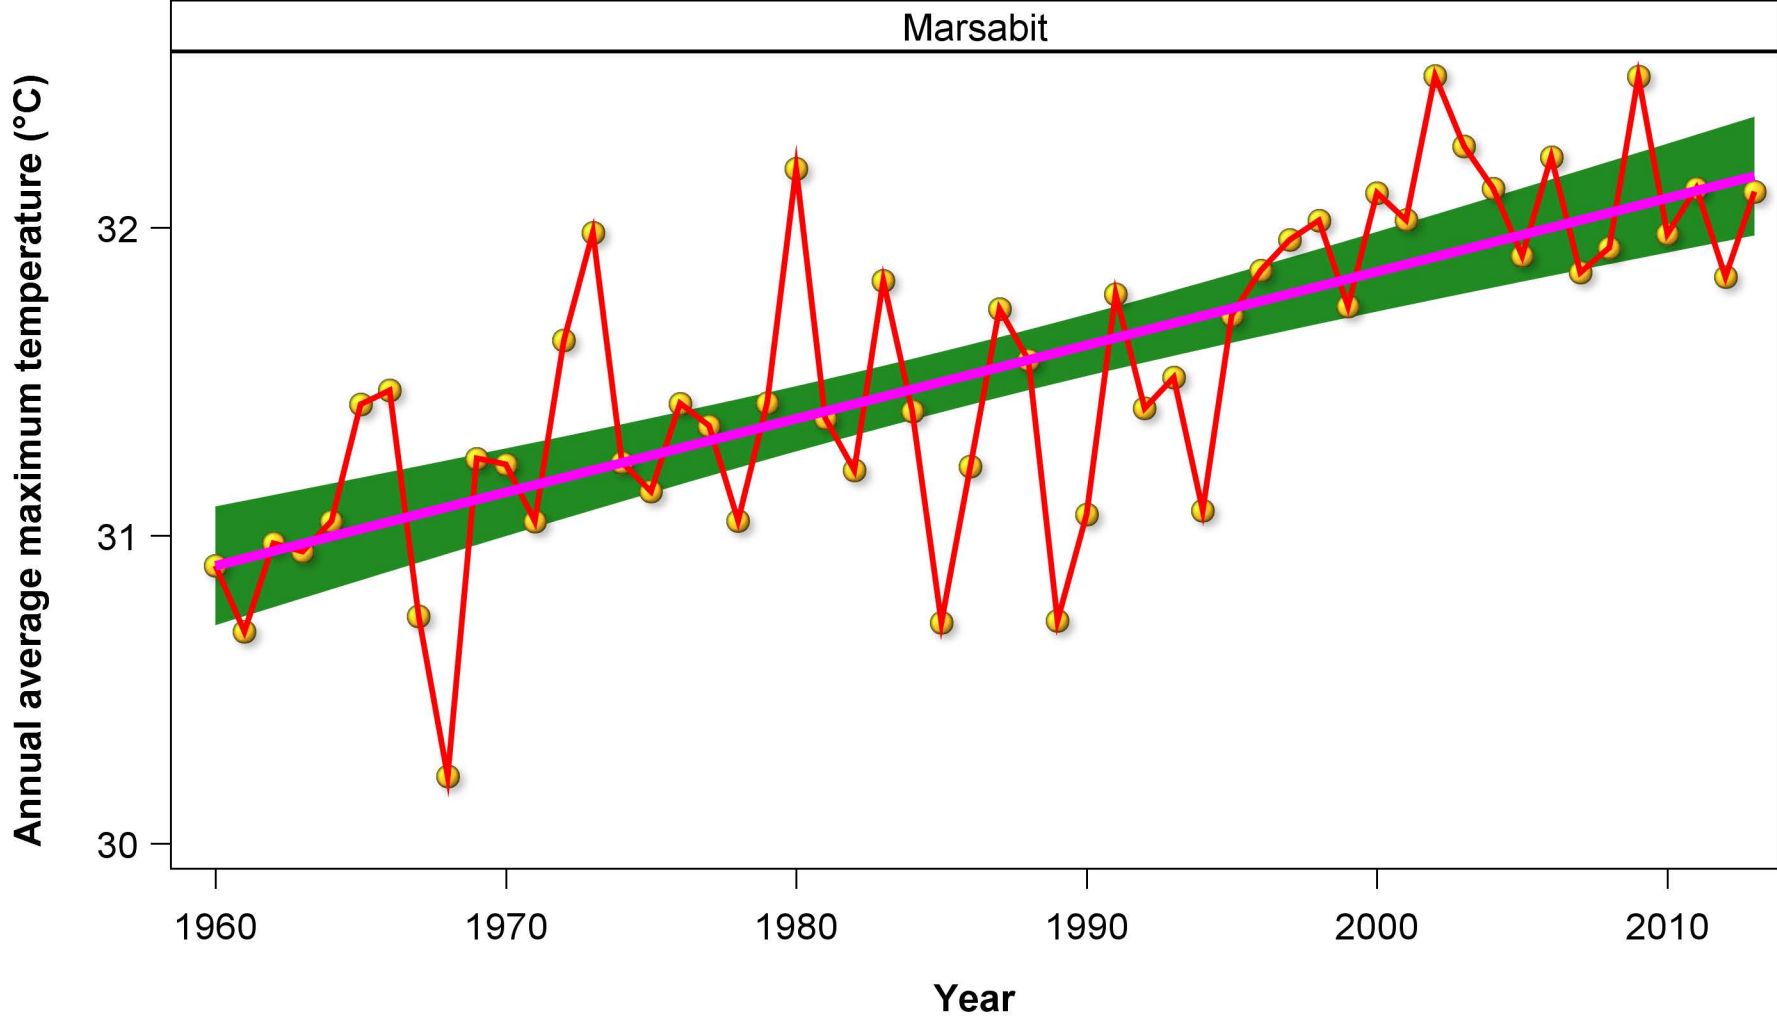

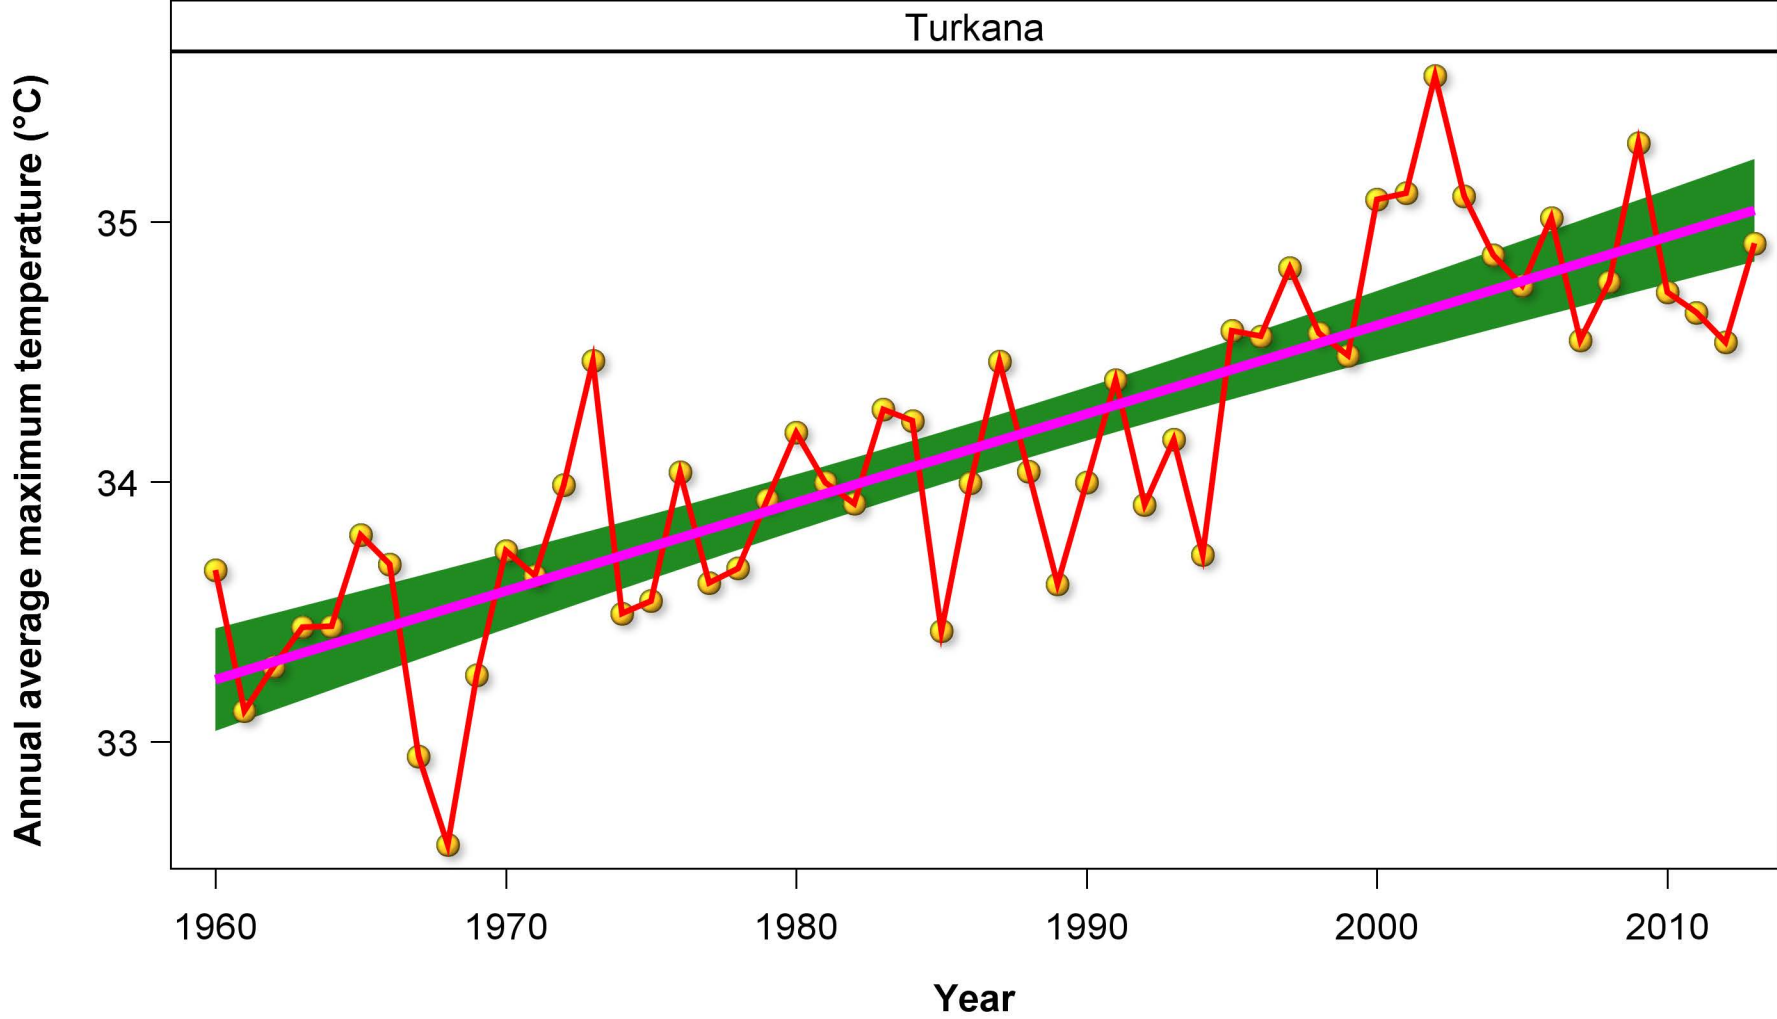

# West Pokot

Annual average maximum temperature (°C)

32  
31  
30

1960

1970

1980

1990

2000

2010

Year

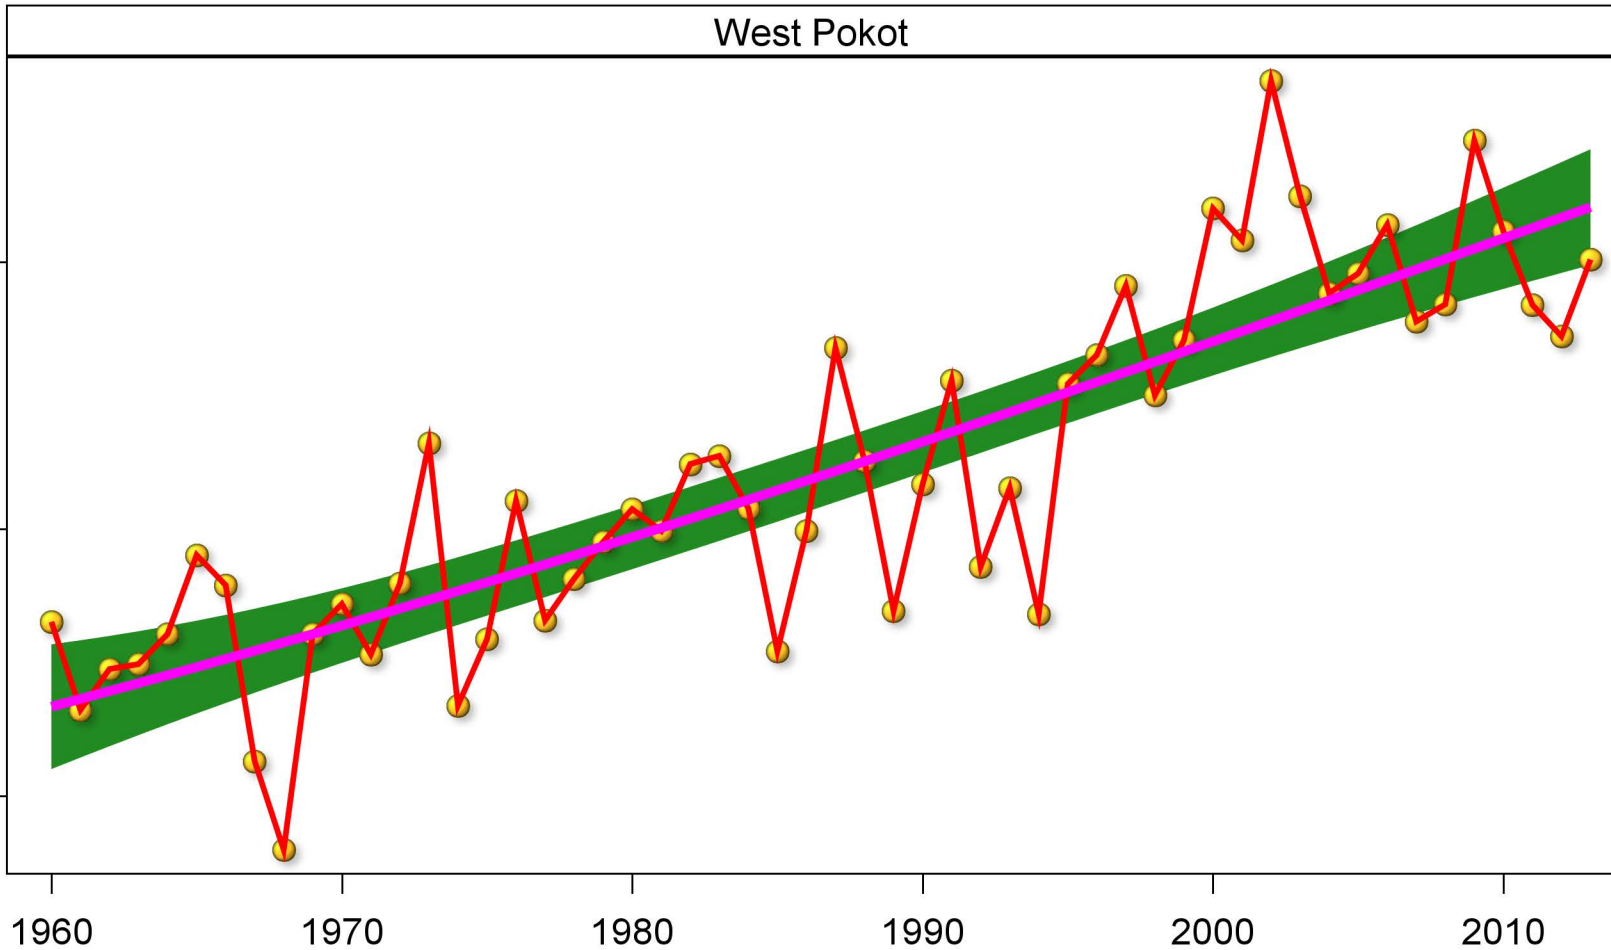

# Elgeyo Marakwet

Annual average maximum temperature (°C)

30.0  
29.5  
29.0  
28.5  
28.0  
27.5

1960

1970

1980

1990

2000

2010

Year

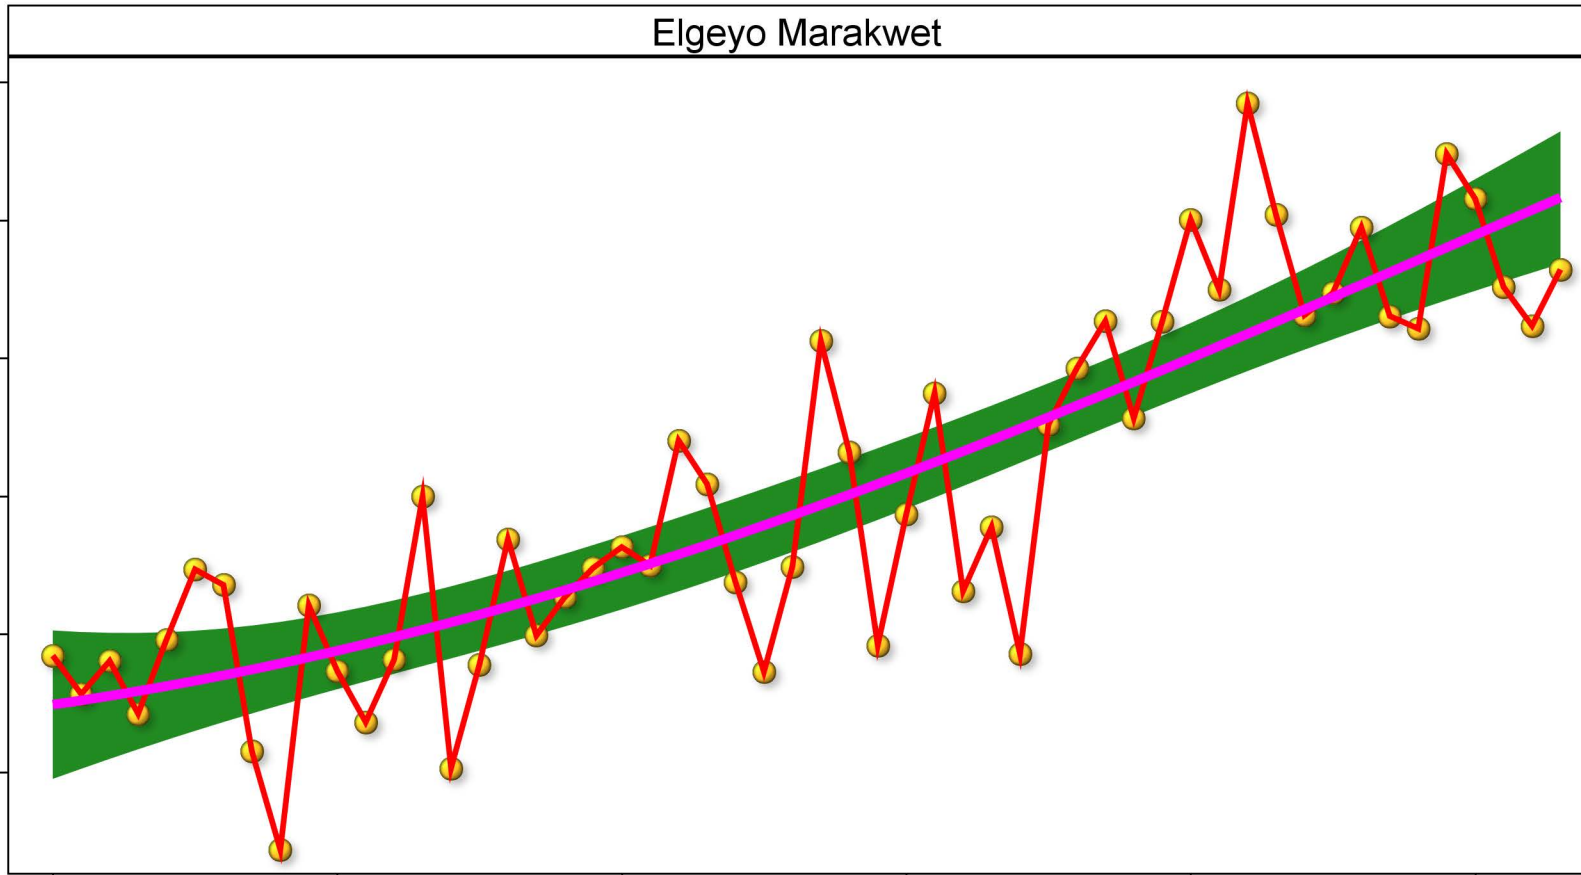

Supplement: S34 (10.1371/journal.pone.0163249.s034) [file journal.pone.0163249.s034]
