# Supplementary material for: Extreme Wildlife Declines and Concurrent Increase in Livestock Numbers in Kenya: What Are the Causes?
Source: PLoS One. 2016 Sep 27;11(9):e0163249. doi: 10.1371/journal.pone.0163249 (PMC5039022; doi:10.1371/journal.pone.0163249)
Supplement: S4 Table — (XLSX) [file pone.0163249.s047.xlsx]

## Sheet: #LN00198
	County	Climate Component	Effect	Estimate	Standard Error	DF	t Value	Pr > |t|	Lower 95% CL	Upper 95% CL	County Number	Order
	Narok	Maximum Temperature	Intercept	-37.9649	43.4309	31	-0.87	0.3888	-126.54	50.613	1	1
	Narok	Maximum Temperature	Year	0.02451	0.02164	49.78	1.13	0.2627	-0.01896	0.06798	1	2
	Narok	Minimum Temperature	Intercept	-84.9571	21.3283	31	-3.98	0.0004	-128.46	-41.4578	1	3
	Narok	Minimum Temperature	Year	0.05508	0.01065	50.92	5.17	<0.0001	0.0337	0.07646	1	4
	Narok	Total Annual Rainfall	Intercept	-4947.55	6688	32	-0.74	0.4648	-18571	8675.47	1	5
	Narok	Total Annual Rainfall	Year	3.0225	3.3413	52.19	0.9	0.3698	-3.6817	9.7267	1	6
	Kajiado	Maximum Temperature	Intercept	-30.2301	38.7114	31	-0.78	0.4408	-109.18	48.7223	2	7
	Kajiado	Maximum Temperature	Year	0.02297	0.01929	49.74	1.19	0.2393	-0.01578	0.06171	2	8
	Kajiado	Minimum Temperature	Intercept	-62.8418	20.5842	31	-3.05	0.0046	-104.82	-20.86	2	9
	Kajiado	Minimum Temperature	Year	0.04524	0.01028	51.09	4.4	<0.0001	0.02459	0.06588	2	10
	Kajiado	Total Annual Rainfall	Intercept	5200.92	2906.76	32	1.79	0.083	-719.95	11122	2	11
	Kajiado	Total Annual Rainfall	Year	-2.3021	1.4628	53	-1.57	0.1215	-5.2362	0.6319	2	12
	Machakos	Maximum Temperature	Intercept	-43.1372	29.3429	31	-1.47	0.1516	-102.98	16.7081	3	13
	Machakos	Maximum Temperature	Year	0.02969	0.01463	50.17	2.03	0.0477	0.000312	0.05907	3	14
	Machakos	Minimum Temperature	Intercept	-52.9164	19.4867	31	-2.72	0.0107	-92.6598	-13.1729	3	15
	Machakos	Minimum Temperature	Year	0.04065	0.009739	51.19	4.17	0.0001	0.0211	0.0602	3	16
	Machakos	Total Annual Rainfall	Intercept	5908.3	3732.39	32	1.58	0.1233	-1694.32	13511	3	17
	Machakos	Total Annual Rainfall	Year	-2.5501	1.8783	53	-1.36	0.1803	-6.3176	1.2174	3	18
	Kitui	Maximum Temperature	Intercept	-44.7843	15.4581	31	-2.9	0.0069	-76.3114	-13.2572	4	19
	Kitui	Maximum Temperature	Year	0.03244	0.007721	50.99	4.2	0.0001	0.01694	0.04794	4	20
	Kitui	Minimum Temperature	Intercept	-11.6364	10.5789	31	-1.1	0.2798	-33.2122	9.9394	4	21
	Kitui	Minimum Temperature	Year	0.02169	0.005299	51.75	4.09	0.0001	0.01106	0.03233	4	22
	Kitui	Total Annual Rainfall	Intercept	5283.54	3418.02	32	1.55	0.132	-1678.74	12246	4	23
	Kitui	Total Annual Rainfall	Year	-2.2836	1.7201	53	-1.33	0.19	-5.7337	1.1666	4	24
	Taita Taveta	Maximum Temperature	Intercept	-51.8594	17.3725	31	-2.99	0.0055	-87.2909	-16.4279	5	25
	Taita Taveta	Maximum Temperature	Year	0.03568	0.008671	50.79	4.11	0.0001	0.01827	0.05309	5	26
	Taita Taveta	Minimum Temperature	Intercept	-5.232	8.7426	31	-0.6	0.5539	-23.0626	12.5985	5	27
	Taita Taveta	Minimum Temperature	Year	0.01773	0.00438	51.78	4.05	0.0002	0.008944	0.02652	5	28
	Taita Taveta	Total Annual Rainfall	Intercept	4706.76	2996.51	32	1.57	0.1261	-1396.94	10810	5	29
	Taita Taveta	Total Annual Rainfall	Year	-2.05	1.508	53	-1.36	0.1798	-5.0747	0.9747	5	30
	Kwale	Maximum Temperature	Intercept	-34.4689	15.3062	31	-2.25	0.0316	-65.686	-3.2517	6	31
	Kwale	Maximum Temperature	Year	0.0281	0.007647	51.08	3.67	0.0006	0.01274	0.04345	6	32
	Kwale	Minimum Temperature	Intercept	8.8813	5.4147	31	1.64	0.1111	-2.162	19.9247	6	33
	Kwale	Minimum Temperature	Year	0.01072	0.002726	52	3.93	0.0003	0.005248	0.01619	6	34
	Kwale	Total Annual Rainfall	Intercept	6084.09	3946.66	32	1.54	0.133	-1954.99	14123	6	35
	Kwale	Total Annual Rainfall	Year	-2.665	1.9862	53	-1.34	0.1854	-6.6487	1.3188	6	36
	Kilifi	Maximum Temperature	Intercept	-22.0024	14.0043	31	-1.57	0.1263	-50.5643	6.5596	7	37
	Kilifi	Maximum Temperature	Year	0.02233	0.007	51.24	3.19	0.0024	0.008283	0.03639	7	38
	Kilifi	Minimum Temperature	Intercept	9.5187	5.7564	31	1.65	0.1083	-2.2214	21.2589	7	39
	Kilifi	Minimum Temperature	Year	0.01062	0.002898	52	3.66	0.0006	0.004802	0.01643	7	40
	Kilifi	Total Annual Rainfall	Intercept	4697.45	3672.34	32	1.28	0.21	-2782.86	12178	7	41
	Kilifi	Total Annual Rainfall	Year	-1.969	1.8481	53	-1.07	0.2915	-5.6759	1.7378	7	42
	Tana River	Maximum Temperature	Intercept	-15.3815	13.3358	31	-1.15	0.2576	-42.5801	11.8171	8	43
	Tana River	Maximum Temperature	Year	0.01894	0.006669	51.41	2.84	0.0064	0.005558	0.03233	8	44
	Tana River	Minimum Temperature	Intercept	5.7886	6.4148	31	0.9	0.3738	-7.2945	18.8717	8	45
	Tana River	Minimum Temperature	Year	0.01367	0.003229	52	4.23	<0.0001	0.007191	0.02015	8	46
	Tana River	Total Annual Rainfall	Intercept	3676.08	2870.92	32	1.28	0.2096	-2171.79	9523.95	8	47
	Tana River	Total Annual Rainfall	Year	-1.608	1.4448	53	-1.11	0.2707	-4.5059	1.2899	8	48
	Lamu	Maximum Temperature	Intercept	-3.8832	9.2757	31	-0.42	0.6784	-22.8011	15.0347	9	49
	Lamu	Maximum Temperature	Year	0.01387	0.004644	51.68	2.99	0.0043	0.00455	0.02319	9	50
	Lamu	Minimum Temperature	Intercept	11.1867	5.5158	31	2.03	0.0512	-0.06292	22.4364	9	51
	Lamu	Minimum Temperature	Year	0.01008	0.002777	52	3.63	0.0006	0.004512	0.01566	9	52
	Lamu	Total Annual Rainfall	Intercept	4168.55	3169.01	32	1.32	0.1977	-2286.51	10624	9	53
	Lamu	Total Annual Rainfall	Year	-1.6399	1.5948	53	-1.03	0.3085	-4.8387	1.5589	9	54
	Baringo	Maximum Temperature	Intercept	-62.4422	22.3735	31	-2.79	0.0089	-108.07	-16.8112	10	55
	Baringo	Maximum Temperature	Year	0.03904	0.01117	50.86	3.5	0.001	0.01661	0.06146	10	56
	Baringo	Minimum Temperature	Intercept	-55.9266	15.704	31	-3.56	0.0012	-87.9552	-23.898	10	57
	Baringo	Minimum Temperature	Year	0.04329	0.007849	51.21	5.51	<0.0001	0.02753	0.05904	10	58
	Baringo	Total Annual Rainfall	Intercept	-8837.62	7657.15	32	-1.15	0.257	-24435	6759.48	10	59
	Baringo	Total Annual Rainfall	Year	4.859	3.8261	52.25	1.27	0.2097	-2.8178	12.5358	10	60
	Laikipia	Maximum Temperature	Intercept	-59.8541	19.3569	31	-3.09	0.0042	-99.3327	-20.3755	11	61
	Laikipia	Maximum Temperature	Year	0.0358	0.009664	50.87	3.7	0.0005	0.01639	0.0552	11	62
	Laikipia	Minimum Temperature	Intercept	-45.8565	14.3665	31	-3.19	0.0032	-75.1571	-16.556	11	63
	Laikipia	Minimum Temperature	Year	0.0362	0.007185	51.42	5.04	<0.0001	0.02178	0.05062	11	64
	Laikipia	Total Annual Rainfall	Intercept	-4514.92	7034.82	32	-0.64	0.5256	-18844	9814.55	11	65
	Laikipia	Total Annual Rainfall	Year	2.5983	3.5162	52.35	0.74	0.4632	-4.4564	9.653	11	66
	Samburu	Maximum Temperature	Intercept	-26.4793	7.1045	31	-3.73	0.0008	-40.9692	-11.9895	12	67
	Samburu	Maximum Temperature	Year	0.02216	0.003568	51.93	6.21	<0.0001	0.015	0.02932	12	68
	Samburu	Minimum Temperature	Intercept	-21.6948	6.4392	31	-3.37	0.002	-34.8277	-8.5619	12	69
	Samburu	Minimum Temperature	Year	0.02647	0.003241	52	8.17	<0.0001	0.01997	0.03297	12	70
	Samburu	Total Annual Rainfall	Intercept	-1575.46	5749.51	32	-0.27	0.7858	-13287	10136	12	71
	Samburu	Total Annual Rainfall	Year	1.0269	2.8745	52.44	0.36	0.7223	-4.7401	6.794	12	72
	Isiolo	Maximum Temperature	Intercept	-8.4978	5.3267	31	-1.6	0.1208	-19.3617	2.3661	13	73
	Isiolo	Maximum Temperature	Year	0.01498	0.002681	52	5.59	<0.0001	0.009596	0.02036	13	74
	Isiolo	Minimum Temperature	Intercept	-4.2782	6.8145	31	-0.63	0.5347	-18.1765	9.6201	13	75
	Isiolo	Minimum Temperature	Year	0.01879	0.00343	52	5.48	<0.0001	0.0119	0.02567	13	76
	Isiolo	Total Annual Rainfall	Intercept	4283.18	2800.54	32	1.53	0.136	-1421.33	9987.68	13	77
	Isiolo	Total Annual Rainfall	Year	-1.9616	1.4094	53	-1.39	0.1698	-4.7885	0.8652	13	78
	Garissa	Maximum Temperature	Intercept	0.9866	5.8449	31	0.17	0.8671	-10.9342	12.9075	14	79
	Garissa	Maximum Temperature	Year	0.01096	0.002942	52	3.73	0.0005	0.005056	0.01686	14	80
	Garissa	Minimum Temperature	Intercept	7.9887	6.3265	31	1.26	0.2161	-4.9143	20.8917	14	81
	Garissa	Minimum Temperature	Year	0.01278	0.003185	52	4.01	0.0002	0.006385	0.01917	14	82
	Garissa	Total Annual Rainfall	Intercept	3218.06	2568.35	32	1.25	0.2193	-2013.51	8449.62	14	83
	Garissa	Total Annual Rainfall	Year	-1.3762	1.2925	53	-1.06	0.2918	-3.9687	1.2163	14	84
	Wajir	Maximum Temperature	Intercept	-1.6734	5.6087	31	-0.3	0.7674	-13.1124	9.7655	15	85
	Wajir	Maximum Temperature	Year	0.01178	0.002823	52	4.17	0.0001	0.006118	0.01745	15	86
	Wajir	Minimum Temperature	Intercept	2.0654	6.2829	31	0.33	0.7446	-10.7486	14.8795	15	87
	Wajir	Minimum Temperature	Year	0.01563	0.003163	52	4.94	<0.0001	0.009285	0.02198	15	88
	Wajir	Total Annual Rainfall	Intercept	3911.86	2449.95	32	1.6	0.1202	-1078.52	8902.24	15	89
	Wajir	Total Annual Rainfall	Year	-1.7826	1.2329	53	-1.45	0.1541	-4.2556	0.6904	15	90
	Mandera	Maximum Temperature	Intercept	-1.7122	5.6137	31	-0.3	0.7624	-13.1613	9.737	16	91
	Mandera	Maximum Temperature	Year	0.01119	0.002826	52	3.96	0.0002	0.005522	0.01686	16	92
	Mandera	Minimum Temperature	Intercept	-1.0833	6.1156	31	-0.18	0.8605	-13.5563	11.3896	16	93
	Mandera	Minimum Temperature	Year	0.01664	0.003079	52	5.4	<0.0001	0.01046	0.02281	16	94
	Mandera	Total Annual Rainfall	Intercept	1970.72	3965.13	32	0.5	0.6226	-6105.99	10047	16	95
	Mandera	Total Annual Rainfall	Year	-0.8224	1.9844	52.68	-0.41	0.6802	-4.8032	3.1583	16	96
	Marsabit	Maximum Temperature	Intercept	-15.5975	5.15	31	-3.03	0.0049	-26.1009	-5.094	17	97
	Marsabit	Maximum Temperature	Year	0.01792	0.002592	52	6.91	<0.0001	0.01272	0.02312	17	98
	Marsabit	Minimum Temperature	Intercept	-15.9124	6.1127	31	-2.6	0.014	-28.3795	-3.4454	17	99
	Marsabit	Minimum Temperature	Year	0.02388	0.003077	52	7.76	<0.0001	0.01771	0.03006	17	100
	Marsabit	Total Annual Rainfall	Intercept	-1092.67	5045.11	32	-0.22	0.8299	-11369	9183.89	17	101
	Marsabit	Total Annual Rainfall	Year	0.7145	2.5224	52.44	0.28	0.7781	-4.3461	5.775	17	102
	Turkana	Maximum Temperature	Intercept	-35.7159	6.2241	31	-5.74	<0.0001	-48.41	-23.0218	18	103
	Turkana	Maximum Temperature	Year	0.02861	0.003133	52	9.13	<0.0001	0.02232	0.0349	18	104
	Turkana	Minimum Temperature	Intercept	-33.5182	6.2522	31	-5.36	<0.0001	-46.2698	-20.7667	18	105
	Turkana	Minimum Temperature	Year	0.03406	0.003147	52	10.82	<0.0001	0.02774	0.04038	18	106
	Turkana	Total Annual Rainfall	Intercept	-7691.97	4988.45	32	-1.54	0.1329	-17853	2469.17	18	107
	Turkana	Total Annual Rainfall	Year	4.0224	2.4916	52.11	1.61	0.1125	-0.9771	9.0219	18	108
	West Pokot	Maximum Temperature	Intercept	-54.3891	14.7031	31	-3.7	0.0008	-84.3764	-24.4019	19	109
	West Pokot	Maximum Temperature	Year	0.03601	0.007354	51.46	4.9	<0.0001	0.02125	0.05077	19	110
	West Pokot	Minimum Temperature	Intercept	-46.1613	11.5049	31	-4.01	0.0004	-69.6256	-22.6969	19	111
	West Pokot	Minimum Temperature	Year	0.03893	0.005758	51.61	6.76	<0.0001	0.02737	0.05049	19	112
	West Pokot	Total Annual Rainfall	Intercept	-12463	7042.59	32	-1.77	0.0863	-26809	1881.86	19	113
	West Pokot	Total Annual Rainfall	Year	6.5801	3.5165	52.02	1.87	0.0669	-0.4761	13.6364	19	114
	Elgeyo Marakwet	Maximum Temperature	Intercept	-69.628	20.3649	31	-3.42	0.0018	-111.16	-28.0935	20	115
	Elgeyo Marakwet	Maximum Temperature	Year	0.04199	0.01017	51.02	4.13	0.0001	0.02157	0.06241	20	116
	Elgeyo Marakwet	Minimum Temperature	Intercept	-61.5477	15.8164	31	-3.89	0.0005	-93.8055	-29.2899	20	117
	Elgeyo Marakwet	Minimum Temperature	Year	0.04527	0.007905	51.19	5.73	<0.0001	0.0294	0.06114	20	118
	Elgeyo Marakwet	Total Annual Rainfall	Intercept	-12322	8511.36	32	-1.45	0.1574	-29659	5014.87	20	119
	Elgeyo Marakwet	Total Annual Rainfall	Year	6.719	4.2513	52.12	1.58	0.1201	-1.8114	15.2493	20	120
	Bomet	Maximum Temperature	Intercept	-45.0897	42.0109	31	-1.07	0.2914	-130.77	40.5921	21	121
	Bomet	Maximum Temperature	Year	0.02768	0.02094	49.97	1.32	0.1921	-0.01437	0.06973	21	122
	Bungoma	Maximum Temperature	Intercept	-81.6708	21.3387	31	-3.83	0.0006	-125.19	-38.1504	21	123
	Bungoma	Maximum Temperature	Year	0.04644	0.01066	51.11	4.36	<0.0001	0.02503	0.06784	21	124
	Busia	Maximum Temperature	Intercept	-82.4374	23.8842	31	-3.45	0.0016	-131.15	-33.7251	21	125
	Busia	Maximum Temperature	Year	0.04874	0.01193	50.99	4.09	0.0002	0.02479	0.07269	21	126
	Embu	Maximum Temperature	Intercept	-54.0765	17.4399	31	-3.1	0.0041	-89.6453	-18.5077	21	127
	Embu	Maximum Temperature	Year	0.03534	0.008706	50.85	4.06	0.0002	0.01786	0.05282	21	128
	Homa Bay	Maximum Temperature	Intercept	-73.1844	31.9112	31	-2.29	0.0288	-138.27	-8.1011	21	129
	Homa Bay	Maximum Temperature	Year	0.04466	0.01592	50.59	2.81	0.0071	0.0127	0.07663	21	130
	Kakamega	Maximum Temperature	Intercept	-81.937	23.541	31	-3.48	0.0015	-129.95	-33.9248	21	131
	Kakamega	Maximum Temperature	Year	0.04722	0.01176	50.97	4.02	0.0002	0.02361	0.07082	21	132
	Kericho	Maximum Temperature	Intercept	-44.4601	40.6339	31	-1.09	0.2823	-127.33	38.4133	21	133
	Kericho	Maximum Temperature	Year	0.02804	0.02025	50.08	1.38	0.1723	-0.01263	0.06872	21	134
	Kiambu	Maximum Temperature	Intercept	-31.1544	38.3244	31	-0.81	0.4225	-109.32	47.0088	21	135
	Kiambu	Maximum Temperature	Year	0.02199	0.0191	49.79	1.15	0.255	-0.01637	0.06035	21	136
	Kirinyaga	Maximum Temperature	Intercept	-48.4557	24.2609	31	-2	0.0546	-97.9361	1.0246	21	137
	Kirinyaga	Maximum Temperature	Year	0.0304	0.0121	50.44	2.51	0.0152	0.006101	0.05469	21	138
	Kisii	Maximum Temperature	Intercept	-59.052	37.7666	31	-1.56	0.1281	-136.08	17.9734	21	139
	Kisii	Maximum Temperature	Year	0.03632	0.01883	50.26	1.93	0.0594	-0.0015	0.07413	21	140
	Kisumu	Maximum Temperature	Intercept	-63.2209	34.383	31	-1.84	0.0756	-133.35	6.9038	21	141
	Kisumu	Maximum Temperature	Year	0.03855	0.01715	50.45	2.25	0.029	0.004117	0.07298	21	142
	Makueni	Maximum Temperature	Intercept	-47.9444	24.7484	31	-1.94	0.0619	-98.4191	2.5302	21	143
	Makueni	Maximum Temperature	Year	0.033	0.01234	50.33	2.67	0.0101	0.008214	0.05778	21	144
	Meru	Maximum Temperature	Intercept	-37.6517	13.0932	31	-2.88	0.0072	-64.3555	-10.948	21	145
	Meru	Maximum Temperature	Year	0.02734	0.006545	51.25	4.18	0.0001	0.0142	0.04048	21	146
	Migori	Maximum Temperature	Intercept	-67.0719	35.8006	31	-1.87	0.0705	-140.09	5.9438	21	147
	Migori	Maximum Temperature	Year	0.04073	0.01785	50.4	2.28	0.0268	0.004884	0.07659	21	148
	Mombasa	Maximum Temperature	Intercept	-26.242	14.5684	31	-1.8	0.0814	-55.9545	3.4705	21	149
	Mombasa	Maximum Temperature	Year	0.02438	0.007281	51.19	3.35	0.0015	0.009761	0.03899	21	150
	Murang'a	Maximum Temperature	Intercept	-36.8938	32.4622	31	-1.14	0.2644	-103.1	29.3132	21	151
	Murang'a	Maximum Temperature	Year	0.0248	0.01618	50.02	1.53	0.1316	-0.0077	0.05729	21	152
	Nairobi	Maximum Temperature	Intercept	-31.8365	39.8847	31	-0.8	0.4308	-113.18	49.5089	21	153
	Nairobi	Maximum Temperature	Year	0.02283	0.01987	49.76	1.15	0.256	-0.01708	0.06275	21	154
	Nakuru	Maximum Temperature	Intercept	-25.973	43.7175	31	-0.59	0.5567	-115.14	63.1894	21	155
	Nakuru	Maximum Temperature	Year	0.01776	0.02178	49.68	0.82	0.4187	-0.02599	0.06152	21	156
	Nandi	Maximum Temperature	Intercept	-66.8474	31.6705	31	-2.11	0.043	-131.44	-2.255	21	157
	Nandi	Maximum Temperature	Year	0.03932	0.0158	50.57	2.49	0.0161	0.0076	0.07104	21	158
	Nyamira	Maximum Temperature	Intercept	-53.8184	38.8924	31	-1.38	0.1763	-133.14	25.5031	21	159
	Nyamira	Maximum Temperature	Year	0.03358	0.01939	50.19	1.73	0.0895	-0.00536	0.07251	21	160
	Nyandarua	Maximum Temperature	Intercept	-24.1406	39.2746	31	-0.61	0.5433	-104.24	55.9604	21	161
	Nyandarua	Maximum Temperature	Year	0.01682	0.01957	49.74	0.86	0.3941	-0.02249	0.05613	21	162
	Nyeri	Maximum Temperature	Intercept	-39.5705	30.3294	31	-1.3	0.2016	-101.43	22.2867	21	163
	Nyeri	Maximum Temperature	Year	0.02427	0.01512	50.12	1.61	0.1146	-0.00609	0.05464	21	164
	Siaya	Maximum Temperature	Intercept	-80.5838	26.5354	31	-3.04	0.0048	-134.7	-26.4645	21	165
	Siaya	Maximum Temperature	Year	0.04827	0.01325	50.85	3.64	0.0006	0.02167	0.07486	21	166
	Tharaka Nithi	Maximum Temperature	Intercept	-42.4964	14.2002	31	-2.99	0.0054	-71.458	-13.5349	21	167
	Tharaka Nithi	Maximum Temperature	Year	0.03019	0.007095	51.11	4.25	<0.0001	0.01594	0.04443	21	168
	Trans Nzoia	Maximum Temperature	Intercept	-76.2854	19.3712	31	-3.94	0.0004	-115.79	-36.7776	21	169
	Trans Nzoia	Maximum Temperature	Year	0.04356	0.009681	51.17	4.5	<0.0001	0.02413	0.063	21	170
	Uasin Gishu	Maximum Temperature	Intercept	-75.6423	22.8874	31	-3.3	0.0024	-122.32	-28.9632	21	171
	Uasin Gishu	Maximum Temperature	Year	0.04416	0.01143	50.94	3.86	0.0003	0.02122	0.06711	21	172
	Vihiga	Maximum Temperature	Intercept	-78.8494	26.9181	31	-2.93	0.0063	-133.75	-23.9496	21	173
	Vihiga	Maximum Temperature	Year	0.04613	0.01344	50.81	3.43	0.0012	0.01915	0.07311	21	174
	Bomet	Minimum Temperature	Intercept	-85.7575	20.605	31	-4.16	0.0002	-127.78	-43.7333	21	175
	Bomet	Minimum Temperature	Year	0.05507	0.01029	50.92	5.35	<0.0001	0.03441	0.07573	21	176
	Bungoma	Minimum Temperature	Intercept	-75.6156	17.3907	31	-4.35	0.0001	-111.08	-40.147	21	177
	Bungoma	Minimum Temperature	Year	0.05067	0.00869	51.13	5.83	<0.0001	0.03323	0.06812	21	178
	Busia	Minimum Temperature	Intercept	-77.9019	18.9936	31	-4.1	0.0003	-116.64	-39.1643	21	179
	Busia	Minimum Temperature	Year	0.0535	0.009486	50.98	5.64	<0.0001	0.03446	0.07254	21	180
	Embu	Minimum Temperature	Intercept	-33.5154	15.5504	31	-2.16	0.039	-65.2307	-1.8001	21	181
	Embu	Minimum Temperature	Year	0.03116	0.007779	51.48	4.01	0.0002	0.01554	0.04677	21	182
	Homa Bay	Minimum Temperature	Intercept	-83.2701	21.295	31	-3.91	0.0005	-126.7	-39.8388	21	183
	Homa Bay	Minimum Temperature	Year	0.05641	0.01063	50.83	5.31	<0.0001	0.03507	0.07775	21	184
	Kakamega	Minimum Temperature	Intercept	-76.4706	18.3274	31	-4.17	0.0002	-113.85	-39.0916	21	185
	Kakamega	Minimum Temperature	Year	0.05186	0.009156	51.05	5.66	<0.0001	0.03348	0.07024	21	186
	Kericho	Minimum Temperature	Intercept	-81.3238	19.6318	31	-4.14	0.0002	-121.36	-41.2846	21	187
	Kericho	Minimum Temperature	Year	0.05336	0.009805	50.97	5.44	<0.0001	0.03367	0.07304	21	188
	Kiambu	Minimum Temperature	Intercept	-70.0071	20.6825	31	-3.38	0.0019	-112.19	-27.8249	21	189
	Kiambu	Minimum Temperature	Year	0.04713	0.01033	51.09	4.56	<0.0001	0.02639	0.06788	21	190
	Kirinyaga	Minimum Temperature	Intercept	-46.9156	16.7359	31	-2.8	0.0086	-81.0487	-12.7825	21	191
	Kirinyaga	Minimum Temperature	Year	0.03537	0.008369	51.37	4.23	<0.0001	0.01858	0.05217	21	192
	Kisii	Minimum Temperature	Intercept	-85.415	21.2631	31	-4.02	0.0003	-128.78	-42.0486	21	193
	Kisii	Minimum Temperature	Year	0.05661	0.01061	50.85	5.33	<0.0001	0.0353	0.07792	21	194
	Kisumu	Minimum Temperature	Intercept	-80.5642	19.7982	31	-4.07	0.0003	-120.94	-40.1856	21	195
	Kisumu	Minimum Temperature	Year	0.05421	0.009887	50.94	5.48	<0.0001	0.03436	0.07406	21	196
	Makueni	Minimum Temperature	Intercept	-37.7194	16.8403	31	-2.24	0.0324	-72.0655	-3.3733	21	197
	Makueni	Minimum Temperature	Year	0.0337	0.008418	51.25	4	0.0002	0.0168	0.0506	21	198
	Meru	Minimum Temperature	Intercept	-16.9402	7.1165	31	-2.38	0.0236	-31.4544	-2.4259	21	199
	Meru	Minimum Temperature	Year	0.02319	0.003582	52	6.47	<0.0001	0.01601	0.03038	21	200
	Migori	Minimum Temperature	Intercept	-86.6863	22.157	31	-3.91	0.0005	-131.88	-41.4969	21	201
	Migori	Minimum Temperature	Year	0.05741	0.01106	50.78	5.19	<0.0001	0.03521	0.07962	21	202
	Mombasa	Minimum Temperature	Intercept	10.926	5.5435	31	1.97	0.0577	-0.38	22.232	21	203
	Mombasa	Minimum Temperature	Year	0.009673	0.00279	52	3.47	0.0011	0.004073	0.01527	21	204
	Murang'a	Minimum Temperature	Intercept	-60.384	18.9479	31	-3.19	0.0033	-99.0285	-21.7394	21	205
	Murang'a	Minimum Temperature	Year	0.04223	0.00947	51.19	4.46	<0.0001	0.02322	0.06123	21	206
	Nairobi	Minimum Temperature	Intercept	-72.4029	21.7697	31	-3.33	0.0023	-116.8	-28.0033	21	207
	Nairobi	Minimum Temperature	Year	0.04889	0.01088	51.07	4.5	<0.0001	0.02706	0.07073	21	208
	Nakuru	Minimum Temperature	Intercept	-77.0234	19.3321	31	-3.98	0.0004	-116.45	-37.5952	21	209
	Nakuru	Minimum Temperature	Year	0.05	0.009657	51.04	5.18	<0.0001	0.03061	0.06938	21	210
	Nandi	Minimum Temperature	Intercept	-78.1245	18.5861	31	-4.2	0.0002	-116.03	-40.2178	21	211
	Nandi	Minimum Temperature	Year	0.05185	0.009285	51.04	5.58	<0.0001	0.03321	0.07049	21	212
	Nyamira	Minimum Temperature	Intercept	-83.8538	20.727	31	-4.05	0.0003	-126.13	-41.5809	21	213
	Nyamira	Minimum Temperature	Year	0.05578	0.01035	50.88	5.39	<0.0001	0.035	0.07656	21	214
	Nyandarua	Minimum Temperature	Intercept	-68.7357	18.3138	31	-3.75	0.0007	-106.09	-31.3844	21	215
	Nyandarua	Minimum Temperature	Year	0.04569	0.009151	51.13	4.99	<0.0001	0.02732	0.06406	21	216
	Nyeri	Minimum Temperature	Intercept	-58.2259	17.0618	31	-3.41	0.0018	-93.0237	-23.428	21	217
	Nyeri	Minimum Temperature	Year	0.03949	0.008529	51.27	4.63	<0.0001	0.02237	0.05661	21	218
	Siaya	Minimum Temperature	Intercept	-79.6269	20.1184	31	-3.96	0.0004	-120.66	-38.5953	21	219
	Siaya	Minimum Temperature	Year	0.05481	0.01004	50.9	5.46	<0.0001	0.03464	0.07498	21	220
	Tharaka Nithi	Minimum Temperature	Intercept	-15.3842	7.1528	31	-2.15	0.0394	-29.9725	-0.7959	21	221
	Tharaka Nithi	Minimum Temperature	Year	0.02274	0.003601	52	6.31	<0.0001	0.01551	0.02996	21	222
	Trans Nzoia	Minimum Temperature	Intercept	-69.5474	15.7864	31	-4.41	0.0001	-101.74	-37.3509	21	223
	Trans Nzoia	Minimum Temperature	Year	0.0473	0.007891	51.23	5.99	<0.0001	0.03146	0.06314	21	224
	Uasin Gishu	Minimum Temperature	Intercept	-70.3218	17.1361	31	-4.1	0.0003	-105.27	-35.3725	21	225
	Uasin Gishu	Minimum Temperature	Year	0.0487	0.008562	51.12	5.69	<0.0001	0.03152	0.06589	21	226
	Vihiga	Minimum Temperature	Intercept	-78.6349	19.2964	31	-4.08	0.0003	-117.99	-39.2796	21	227
	Vihiga	Minimum Temperature	Year	0.05334	0.009637	50.98	5.53	<0.0001	0.03399	0.07269	21	228
	Bomet	Total Annual Rainfall	Intercept	-7006.2	7488.05	32	-0.94	0.3565	-22259	8246.46	21	229
	Bomet	Total Annual Rainfall	Year	4.2755	3.7408	52.17	1.14	0.2583	-3.2303	11.7813	21	230
	Bungoma	Total Annual Rainfall	Intercept	-13345	8273.15	32	-1.61	0.1166	-30197	3506.8	21	231
	Bungoma	Total Annual Rainfall	Year	7.4155	4.1301	51.97	1.8	0.0784	-0.8722	15.7032	21	232
	Busia	Total Annual Rainfall	Intercept	-9601.29	7500.18	32	-1.28	0.2097	-24879	5676.08	21	233
	Busia	Total Annual Rainfall	Year	5.5188	3.7449	52.02	1.47	0.1466	-1.9958	13.0335	21	234
	Embu	Total Annual Rainfall	Intercept	7252.73	4370.6	32	1.66	0.1068	-1649.9	16155	21	235
	Embu	Total Annual Rainfall	Year	-2.9381	2.1995	53	-1.34	0.1873	-7.3498	1.4736	21	236
	Homa Bay	Total Annual Rainfall	Intercept	-7083.14	6870.75	32	-1.03	0.3103	-21078	6912.13	21	237
	Homa Bay	Total Annual Rainfall	Year	4.1742	3.4319	52.13	1.22	0.2294	-2.712	11.0604	21	238
	Kakamega	Total Annual Rainfall	Intercept	-12870	8267.16	32	-1.56	0.1294	-29710	3969.44	21	239
	Kakamega	Total Annual Rainfall	Year	7.2212	4.1276	52.01	1.75	0.0861	-1.0615	15.5039	21	240
	Kericho	Total Annual Rainfall	Intercept	-9011.95	8042.76	32	-1.12	0.2708	-25395	7370.62	21	241
	Kericho	Total Annual Rainfall	Year	5.1983	4.0177	52.16	1.29	0.2014	-2.8632	13.2598	21	242
	Kiambu	Total Annual Rainfall	Intercept	1948.31	6864.29	32	0.28	0.7784	-12034	15930	21	243
	Kiambu	Total Annual Rainfall	Year	-0.4233	3.4352	52.67	-0.12	0.9024	-7.3143	6.4678	21	244
	Kirinyaga	Total Annual Rainfall	Intercept	6477.06	4313.5	32	1.5	0.143	-2309.25	15263	21	245
	Kirinyaga	Total Annual Rainfall	Year	-2.5542	2.1708	53	-1.18	0.2446	-6.9083	1.7998	21	246
	Kisii	Total Annual Rainfall	Intercept	-9845.42	7881.72	32	-1.25	0.2207	-25900	6209.12	21	247
	Kisii	Total Annual Rainfall	Year	5.6519	3.9358	52.04	1.44	0.157	-2.2456	13.5494	21	248
	Kisumu	Total Annual Rainfall	Intercept	-10376	7767.82	32	-1.34	0.191	-26199	5446.42	21	249
	Kisumu	Total Annual Rainfall	Year	6.0374	3.8793	52.08	1.56	0.1257	-1.7468	13.8216	21	250
	Makueni	Total Annual Rainfall	Intercept	5228.91	3238.83	32	1.61	0.1163	-1368.37	11826	21	251
	Makueni	Total Annual Rainfall	Year	-2.2762	1.63	53	-1.4	0.1684	-5.5455	0.9931	21	252
	Meru	Total Annual Rainfall	Intercept	5462.52	4259.57	32	1.28	0.2089	-3213.94	14139	21	253
	Meru	Total Annual Rainfall	Year	-2.2866	2.1393	52.95	-1.07	0.29	-6.5776	2.0044	21	254
	Migori	Total Annual Rainfall	Intercept	-7486.54	7110.37	32	-1.05	0.3003	-21970	6996.82	21	255
	Migori	Total Annual Rainfall	Year	4.3806	3.5512	52.09	1.23	0.2229	-2.7451	11.5062	21	256
	Mombasa	Total Annual Rainfall	Intercept	5683	4353.73	32	1.31	0.2011	-3185.26	14551	21	257
	Mombasa	Total Annual Rainfall	Year	-2.3721	2.191	53	-1.08	0.2839	-6.7667	2.0226	21	258
	Muranga	Total Annual Rainfall	Intercept	5743.7	4074.82	32	1.41	0.1683	-2556.43	14044	21	259
	Muranga	Total Annual Rainfall	Year	-2.2273	2.0507	53	-1.09	0.2823	-6.3405	1.8858	21	260
	Nairobi	Total Annual Rainfall	Intercept	283.26	7595.12	32	0.04	0.9705	-15187	15754	21	261
	Nairobi	Total Annual Rainfall	Year	0.3715	3.7987	52.54	0.1	0.9225	-7.2492	7.9922	21	262
	Nakuru	Total Annual Rainfall	Intercept	-4830.86	7271.37	32	-0.66	0.5112	-19642	9980.43	21	263
	Nakuru	Total Annual Rainfall	Year	2.9188	3.6345	52.35	0.8	0.4255	-4.3731	10.2108	21	264
	Nandi	Total Annual Rainfall	Intercept	-12852	8729.28	32	-1.47	0.1507	-30633	4929	21	265
	Nandi	Total Annual Rainfall	Year	7.1798	4.359	52.04	1.65	0.1056	-1.567	15.9265	21	266
	Nyamira	Total Annual Rainfall	Intercept	-9710.69	7851.17	32	-1.24	0.2251	-25703	6281.62	21	267
	Nyamira	Total Annual Rainfall	Year	5.588	3.9209	52.07	1.43	0.1601	-2.2796	13.4555	21	268
	Nyandarua	Total Annual Rainfall	Intercept	-3752.47	7258.42	32	-0.52	0.6087	-18537	11032	21	269
	Nyandarua	Total Annual Rainfall	Year	2.3821	3.6283	52.38	0.66	0.5144	-4.8975	9.6616	21	270
	Nyeri	Total Annual Rainfall	Intercept	-1251.13	7807.26	32	-0.16	0.8737	-17154	14652	21	271
	Nyeri	Total Annual Rainfall	Year	1.077	3.9039	52.48	0.28	0.7837	-6.7551	8.9091	21	272
	Siaya	Total Annual Rainfall	Intercept	-8550.42	7035.13	32	-1.22	0.2331	-22881	5779.67	21	273
	Siaya	Total Annual Rainfall	Year	4.9945	3.5135	52.08	1.42	0.1611	-2.0556	12.0446	21	274
	Tharaka Nithi	Total Annual Rainfall	Intercept	7054.05	4136.13	32	1.71	0.0978	-1370.98	15479	21	275
	Tharaka Nithi	Total Annual Rainfall	Year	-2.7777	2.0815	53	-1.33	0.1878	-6.9527	1.3973	21	276
	Trans Nzoia	Total Annual Rainfall	Intercept	-14850	8491.54	32	-1.75	0.0899	-32147	2446.71	21	277
	Trans Nzoia	Total Annual Rainfall	Year	8.0115	4.2392	51.98	1.89	0.0644	-0.4952	16.5183	21	278
	Uasin Gishu	Total Annual Rainfall	Intercept	-13554	8857.57	32	-1.53	0.1358	-31596	4488.53	21	279
	Uasin Gishu	Total Annual Rainfall	Year	7.3399	4.4234	52.07	1.66	0.1031	-1.5361	16.2159	21	280
	Vihiga	Total Annual Rainfall	Intercept	-11280	8077.49	32	-1.4	0.1722	-27734	5173.01	21	281
	Vihiga	Total Annual Rainfall	Year	6.5686	4.0336	52.05	1.63	0.1095	-1.5252	14.6624	21	282
