# Supplementary material for: Extreme Wildlife Declines and Concurrent Increase in Livestock Numbers in Kenya: What Are the Causes?
Source: PLOS journal article supplement (doi:10.1371/journal.pone.0163249), 2016-09-27

## Sheep and goats in West Pokot

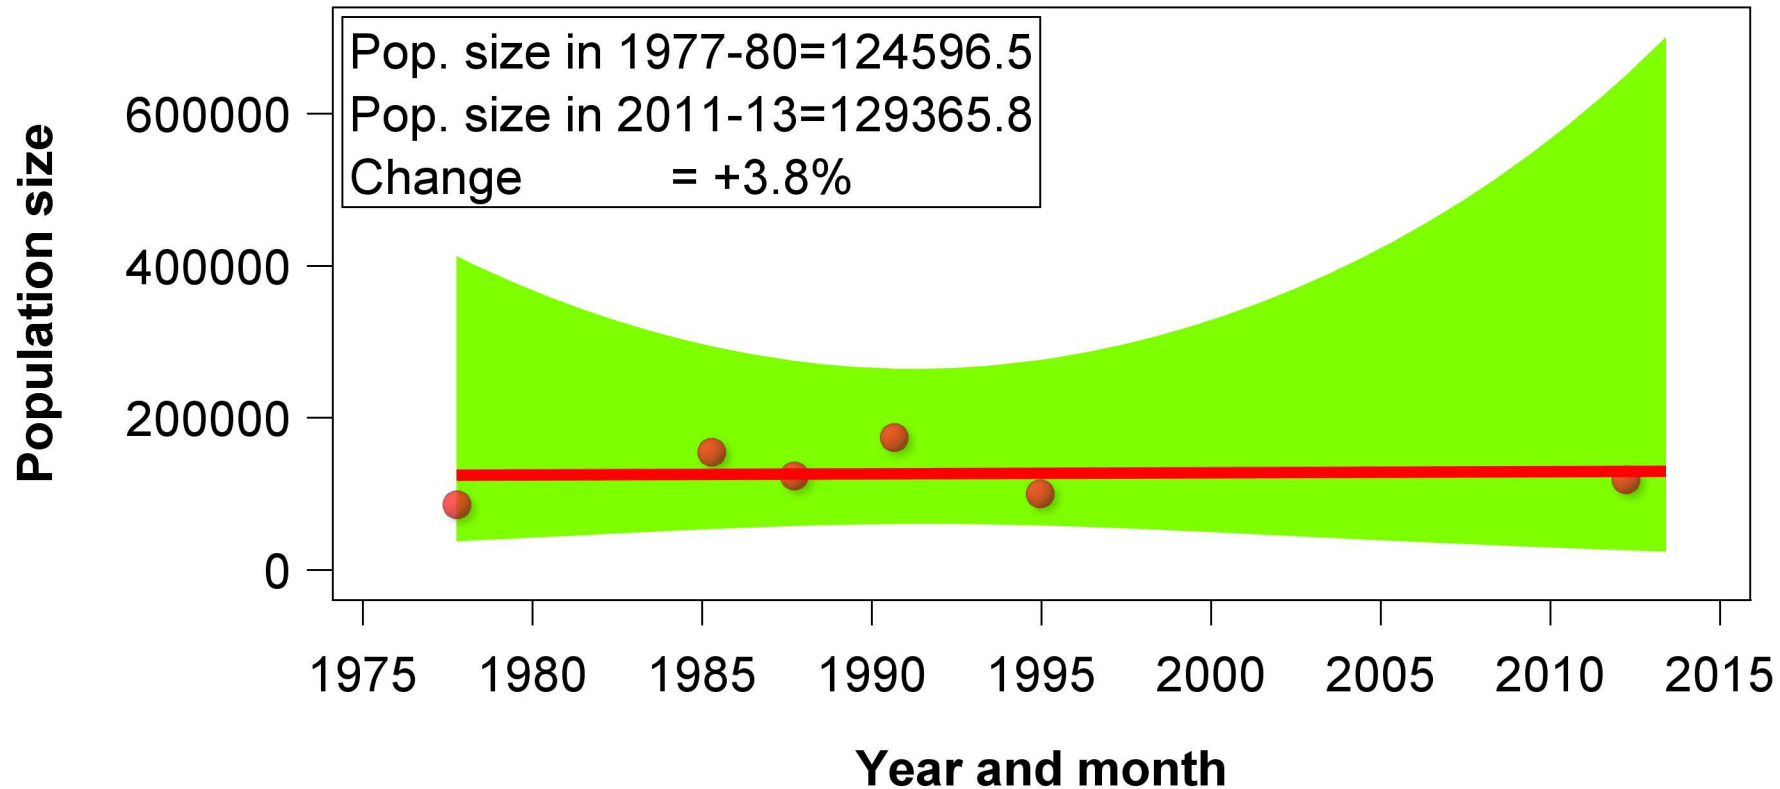

## Camel in West Pokot

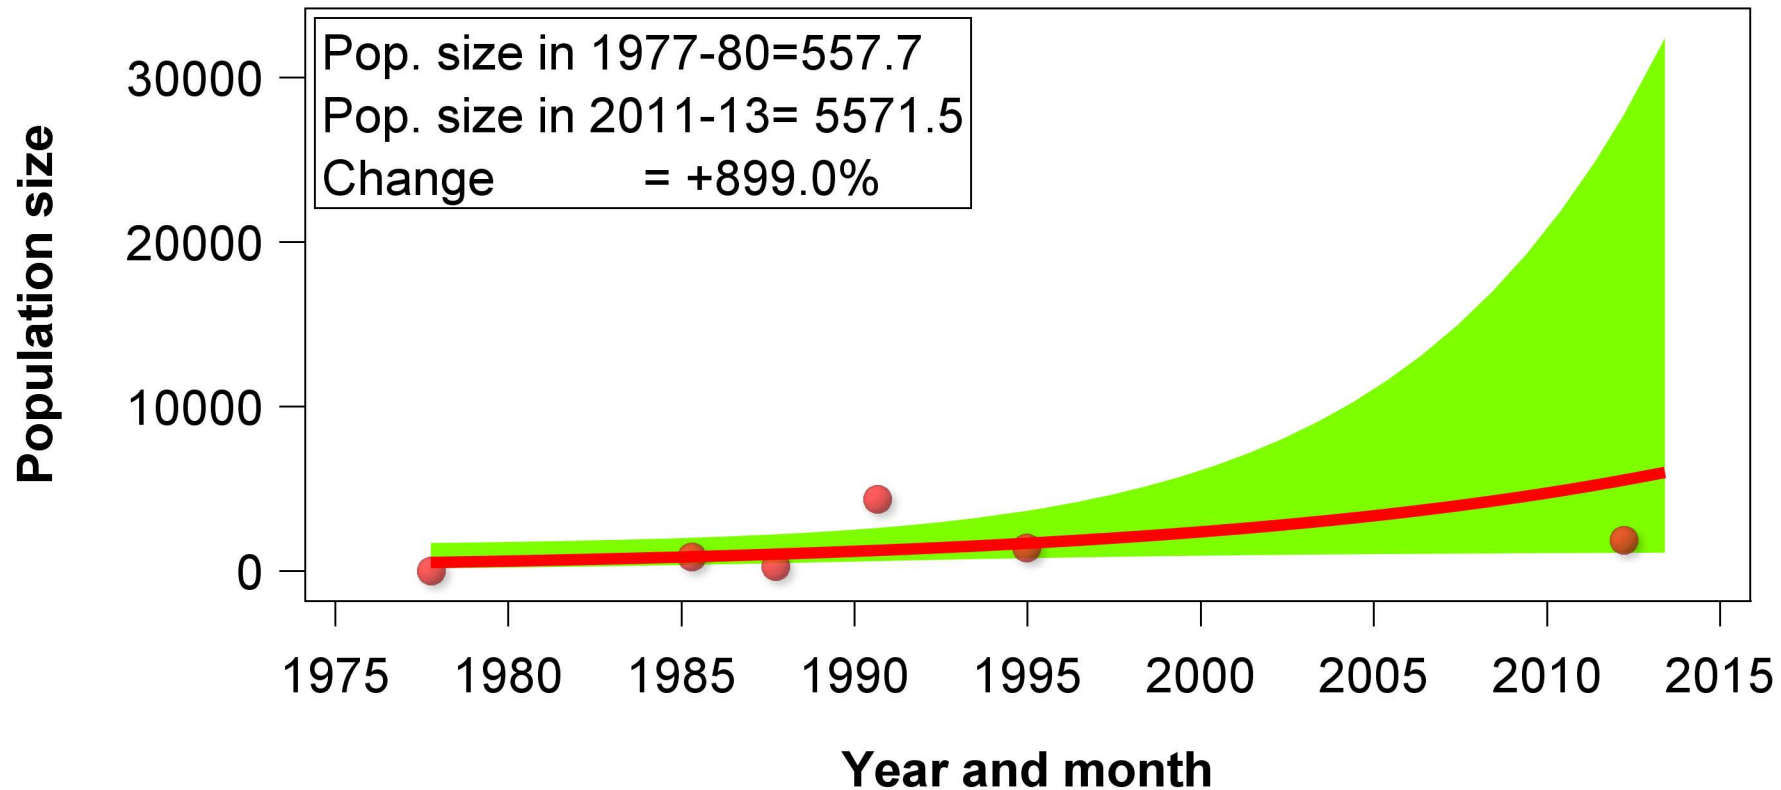

## Donkeys in West Pokot

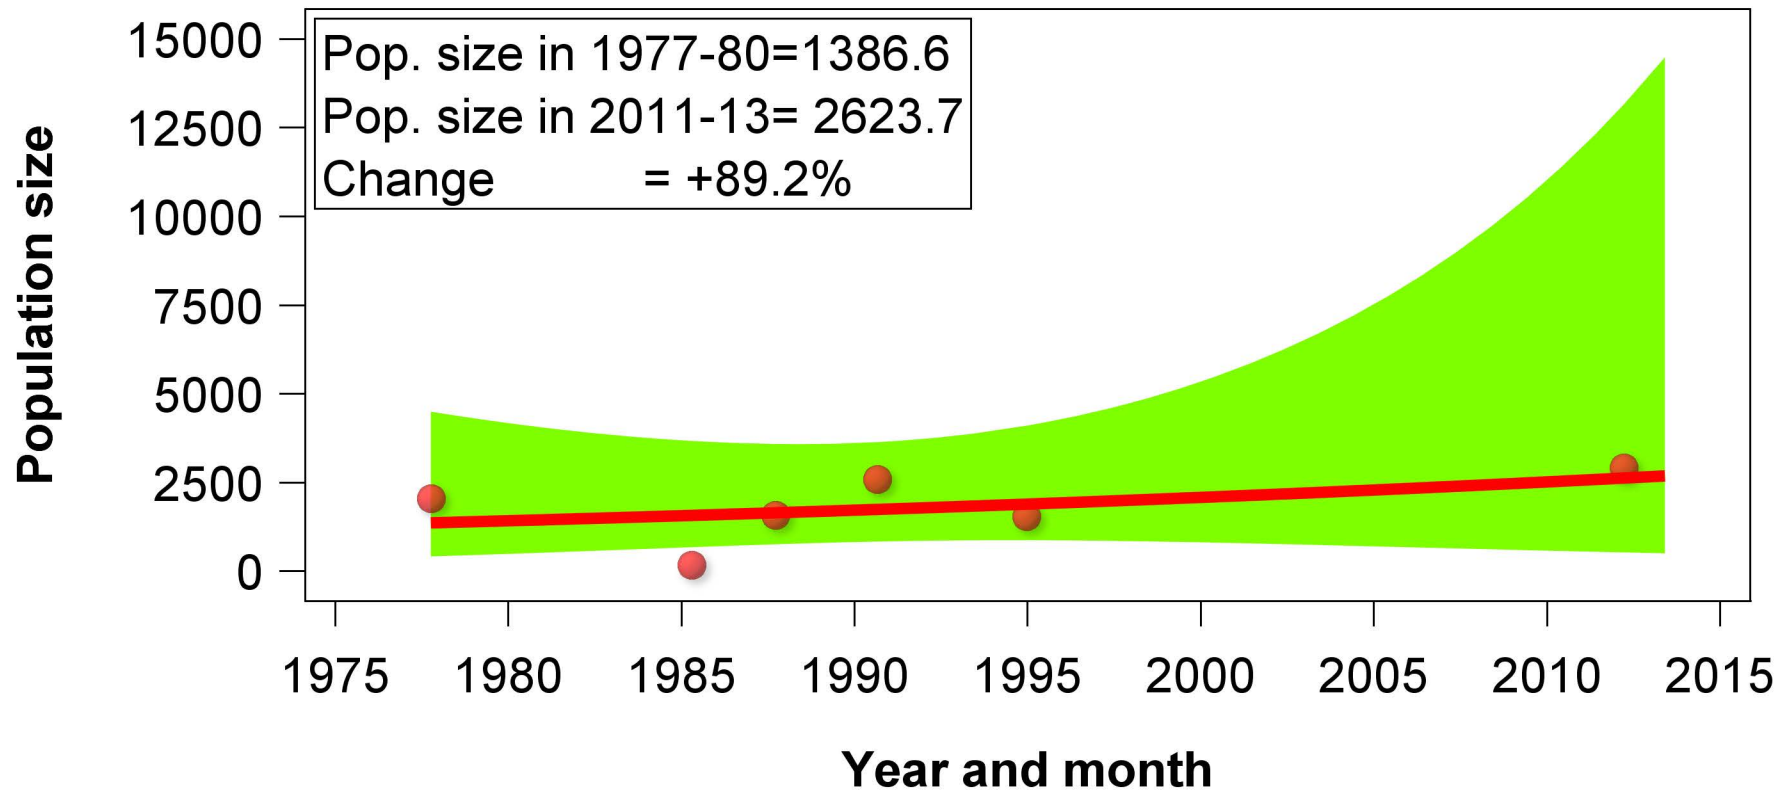

## Cattle in West Pokot

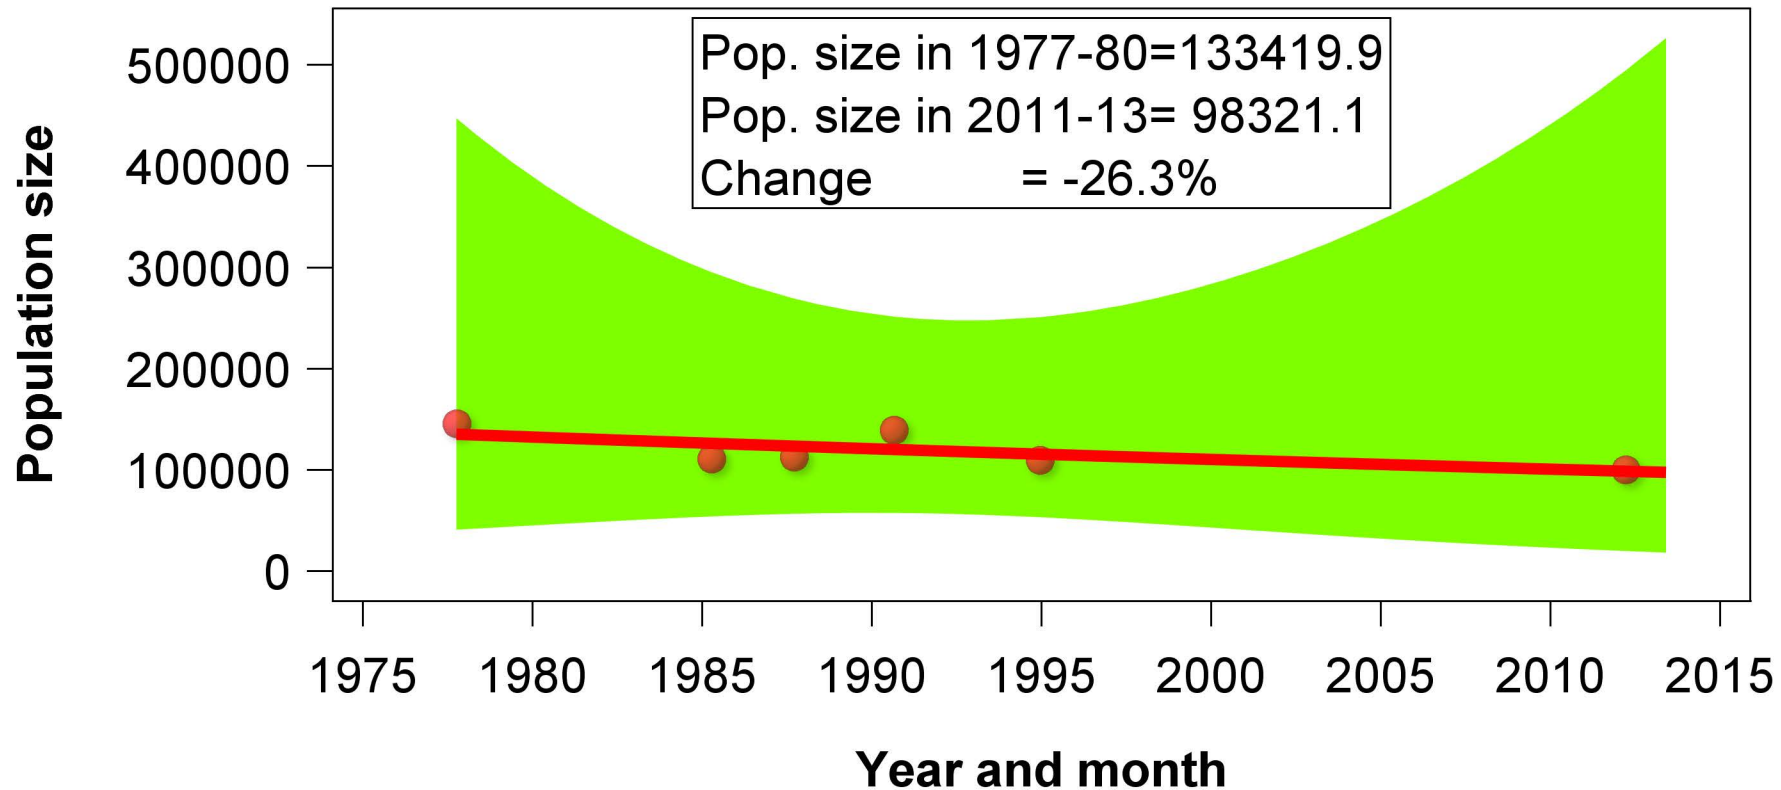

## Gerenuk in West Pokot

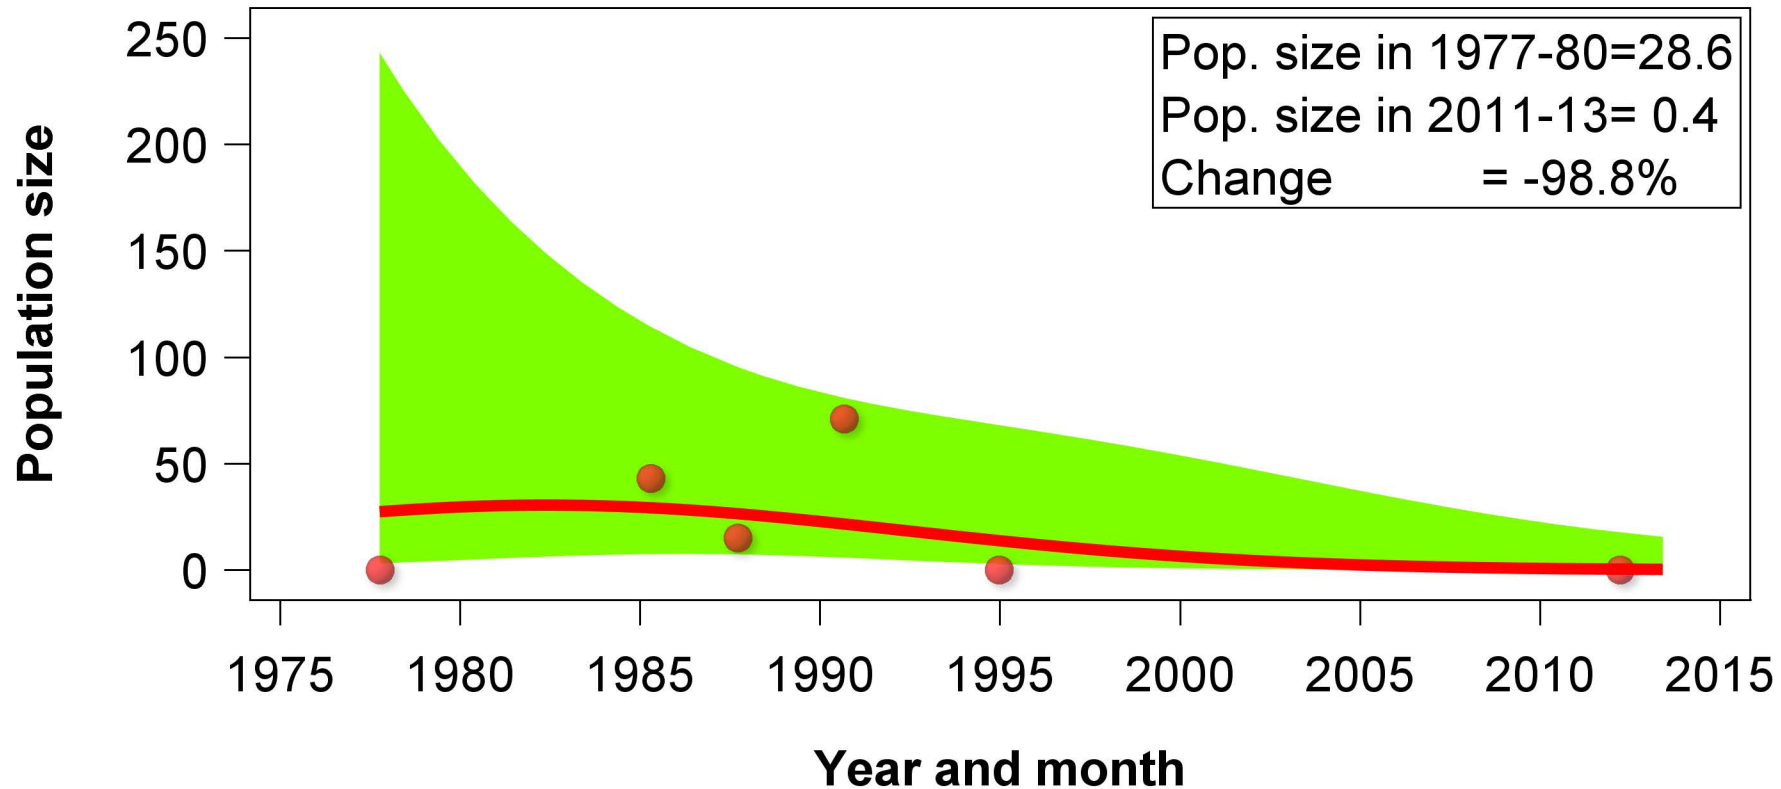

## Grant's gazelle in West Pokot

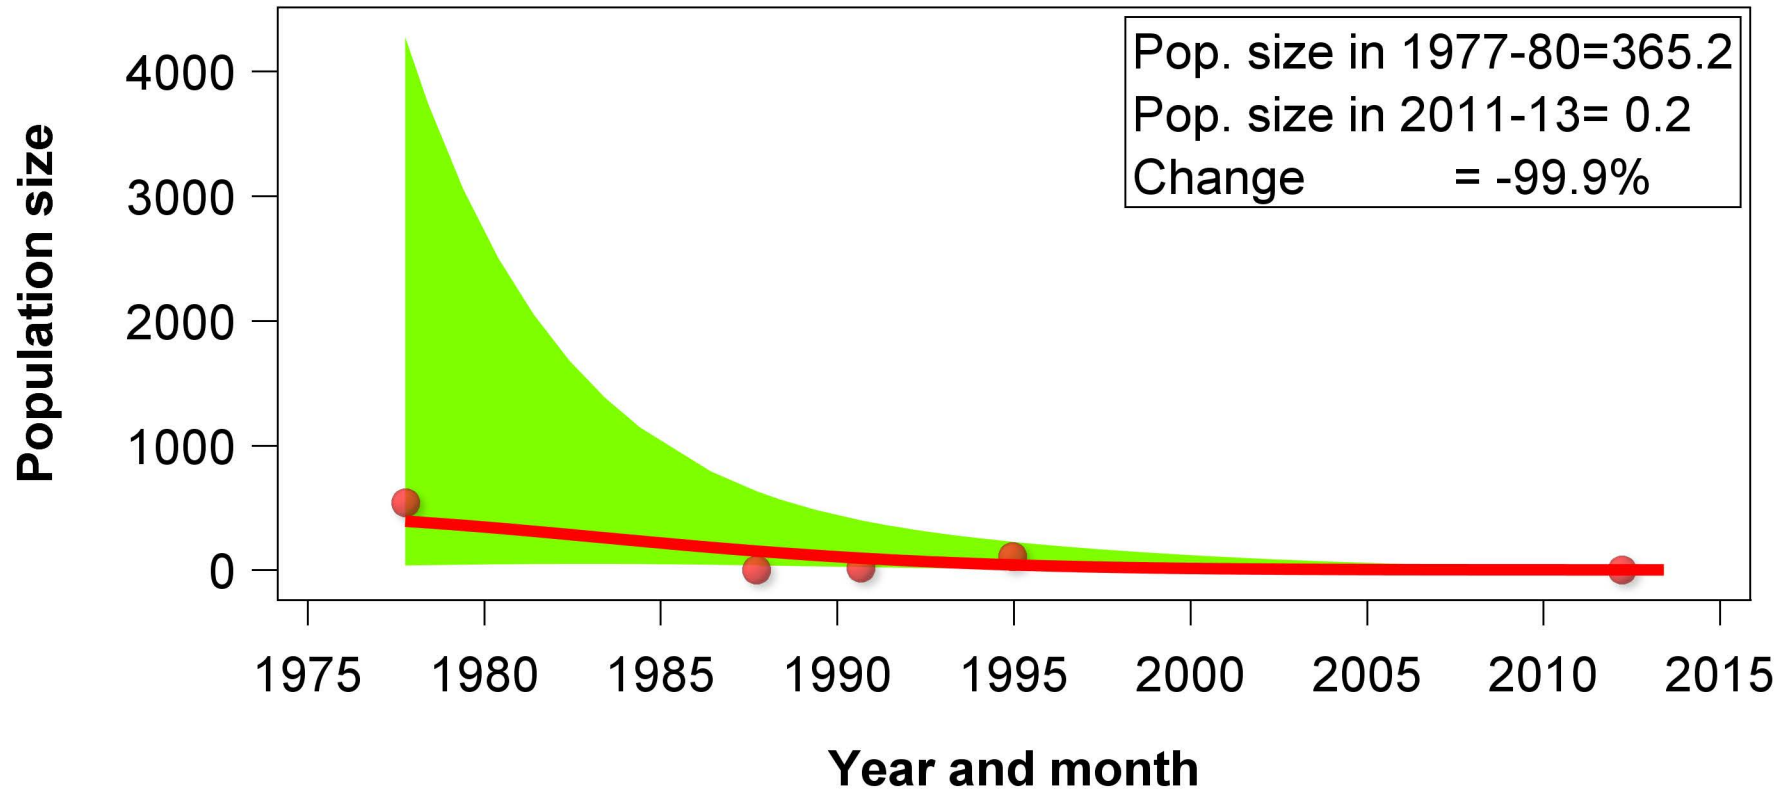

## Warthog in West Pokot

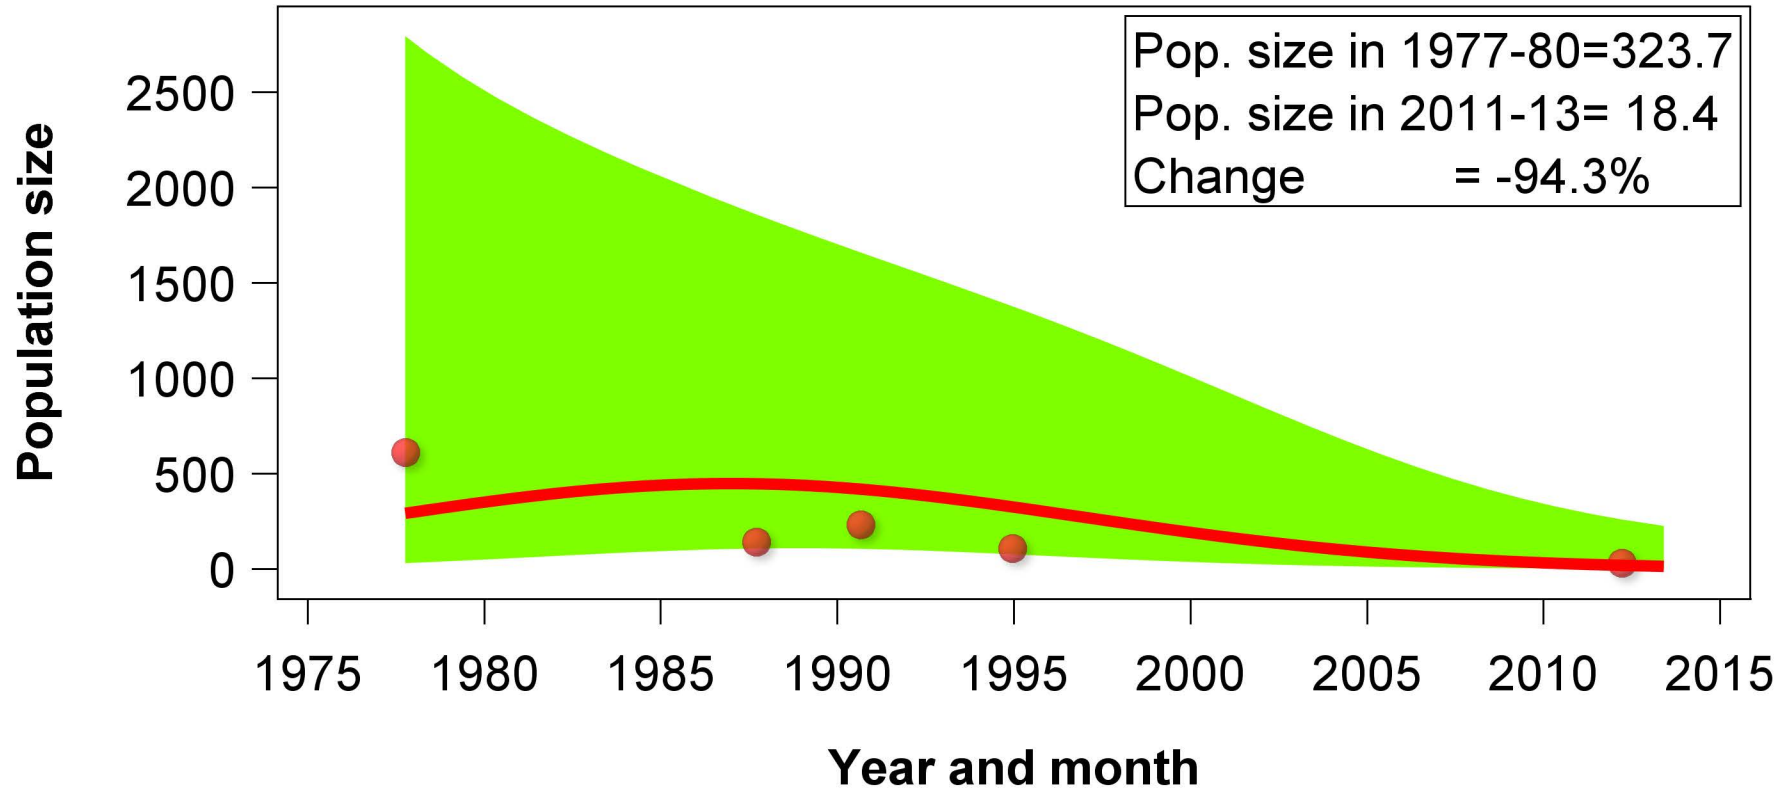

## Lesser Kudu in West Pokot

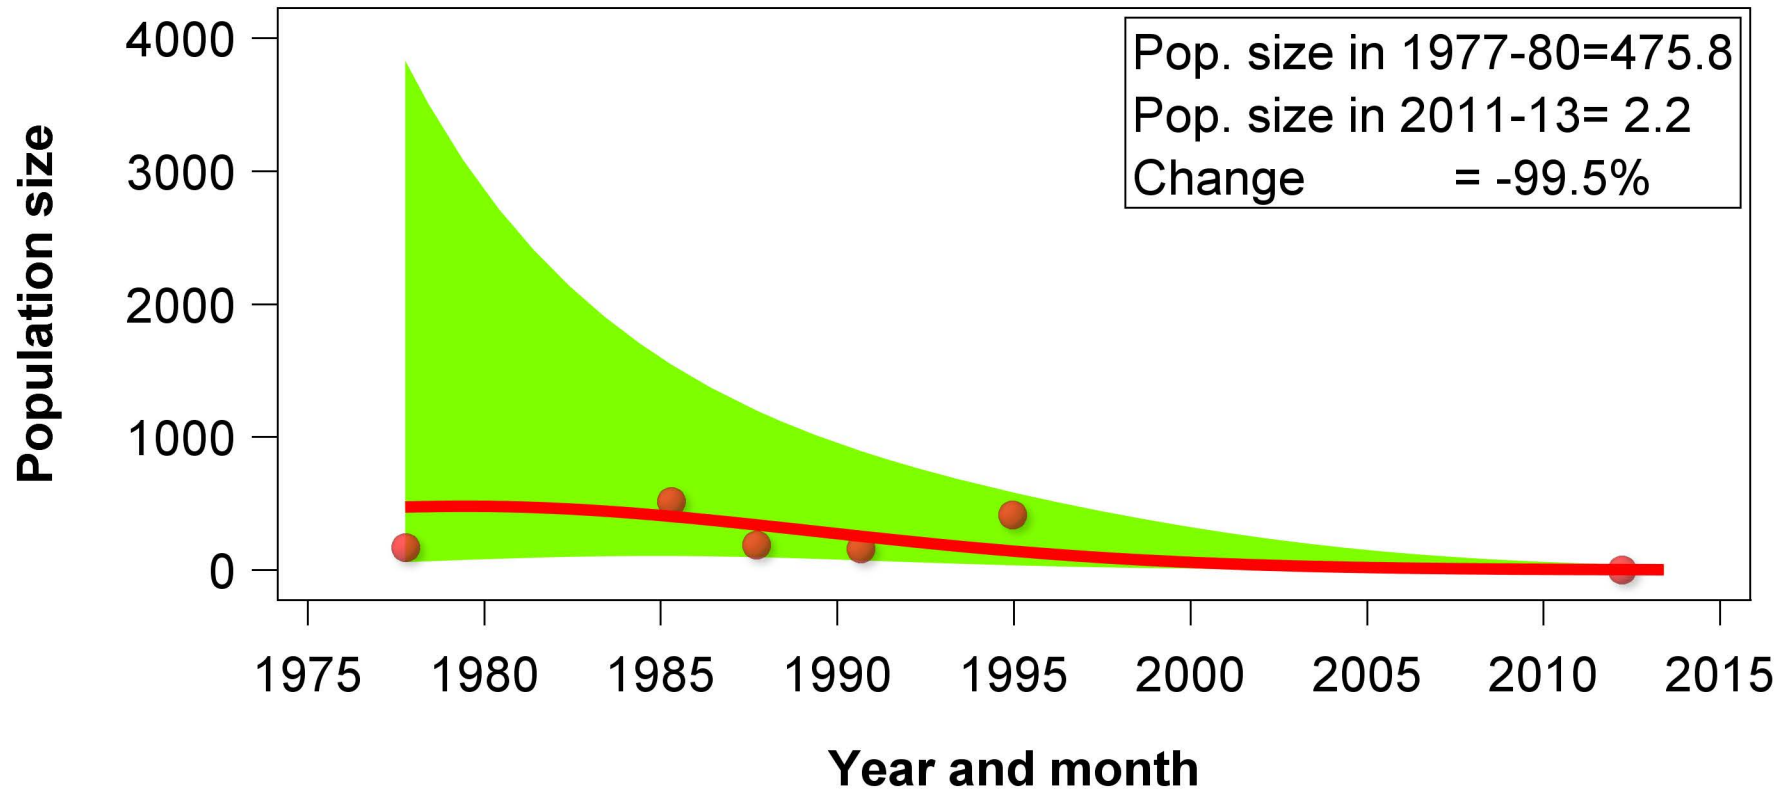



## Impala in West Pokot

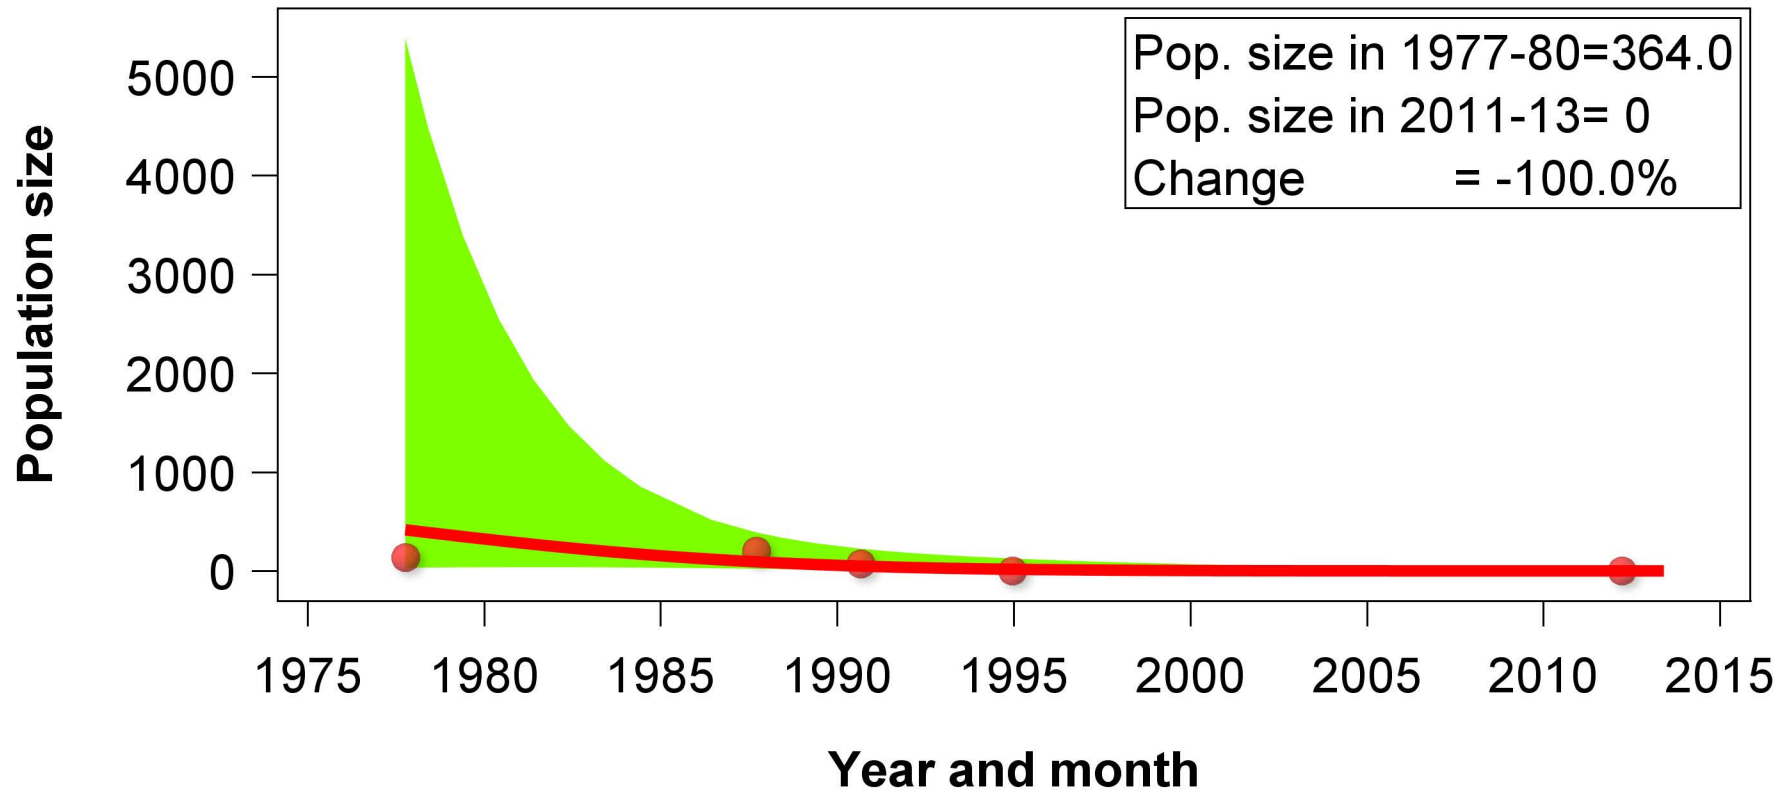

Supplement: S30 (10.1371/journal.pone.0163249.s030) [file journal.pone.0163249.s030]
