# Supplementary material for: Extreme Wildlife Declines and Concurrent Increase in Livestock Numbers in Kenya: What Are the Causes?
Source: PLOS journal article supplement (doi:10.1371/journal.pone.0163249), 2016-09-27

## Sheep and goats in Elgeyo Marakwet

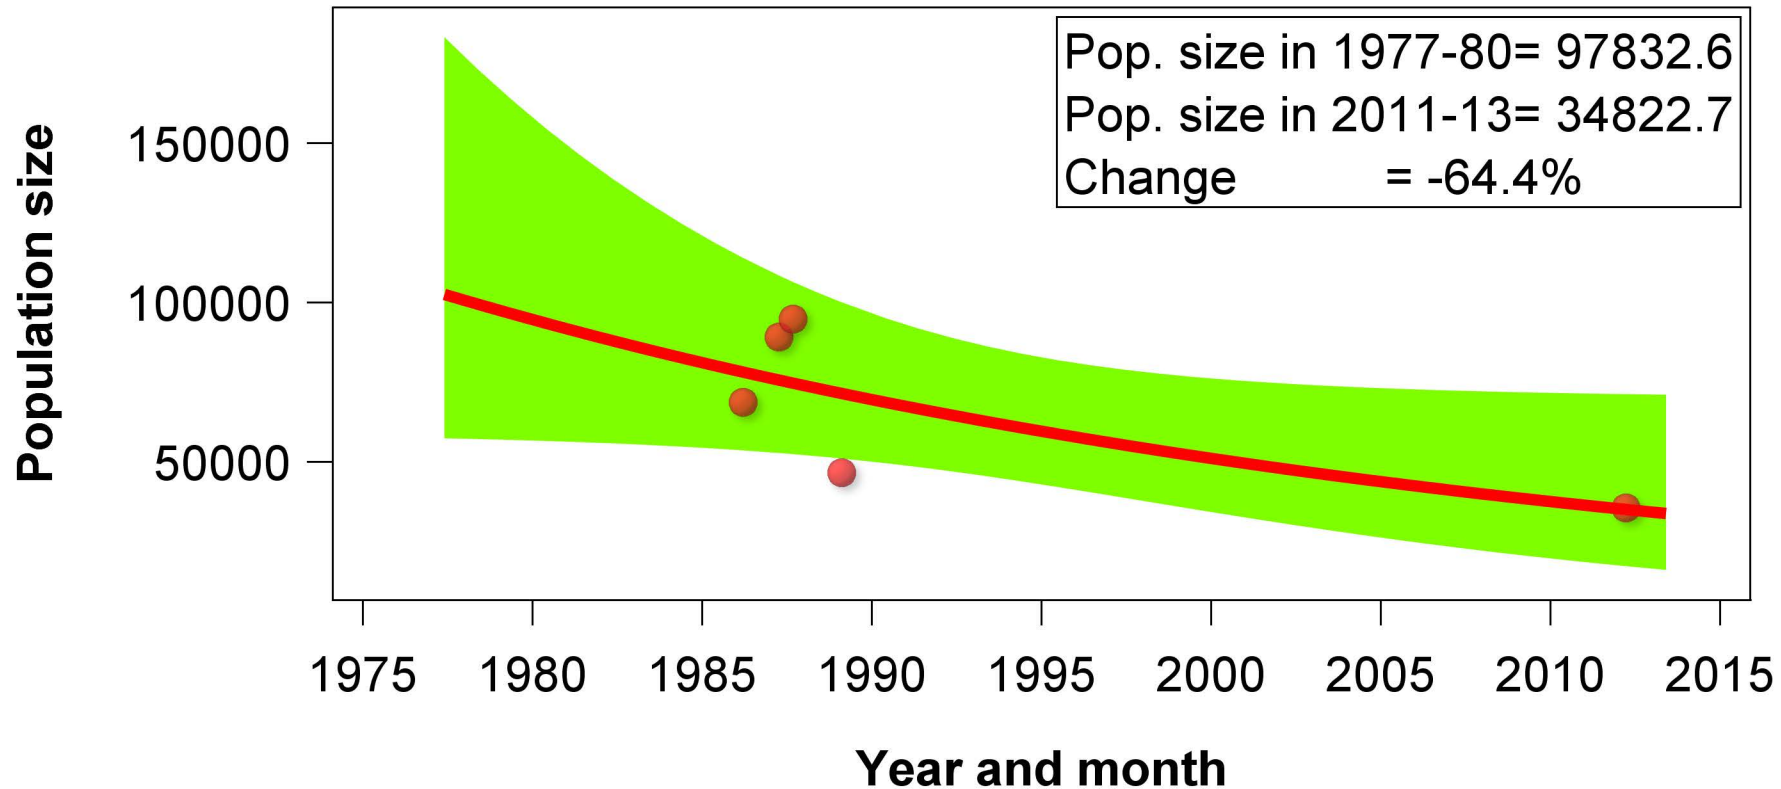

## Donkeys in Elgeyo Marakwet

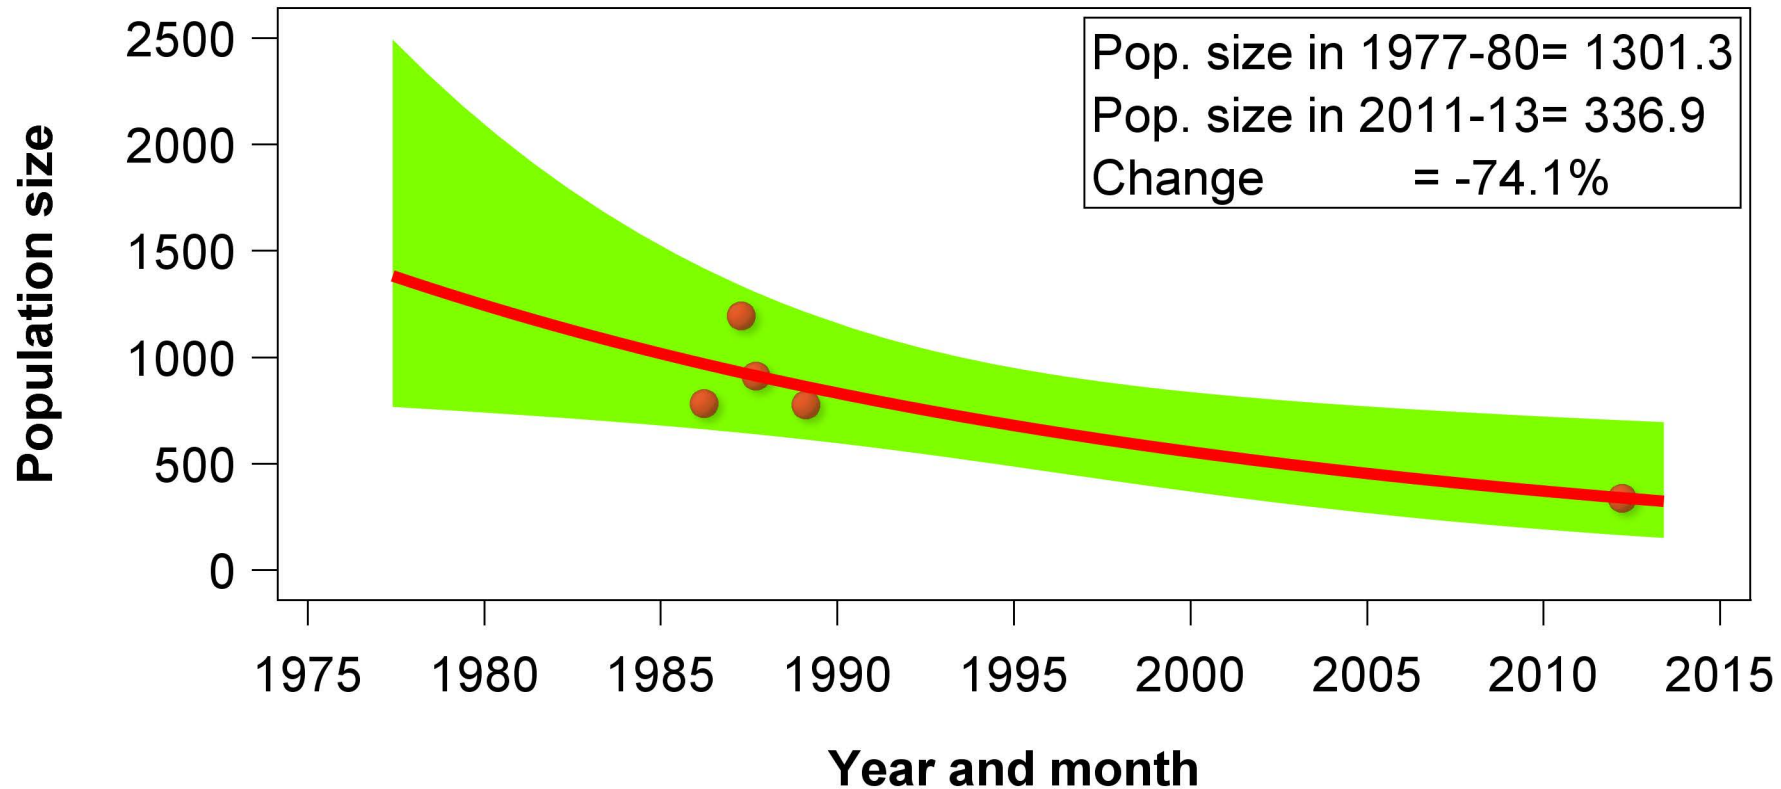

## Cattle in Elgeyo Marakwet

Population size

125000  
100000  
75000  
50000  
25000

Pop. size in 1977-80= 69189.6  
Pop. size in 2011-13= 41075.2  
Change = -40.6%

1975 1980 1985 1990 1995 2000 2005 2010 2015

Year and month

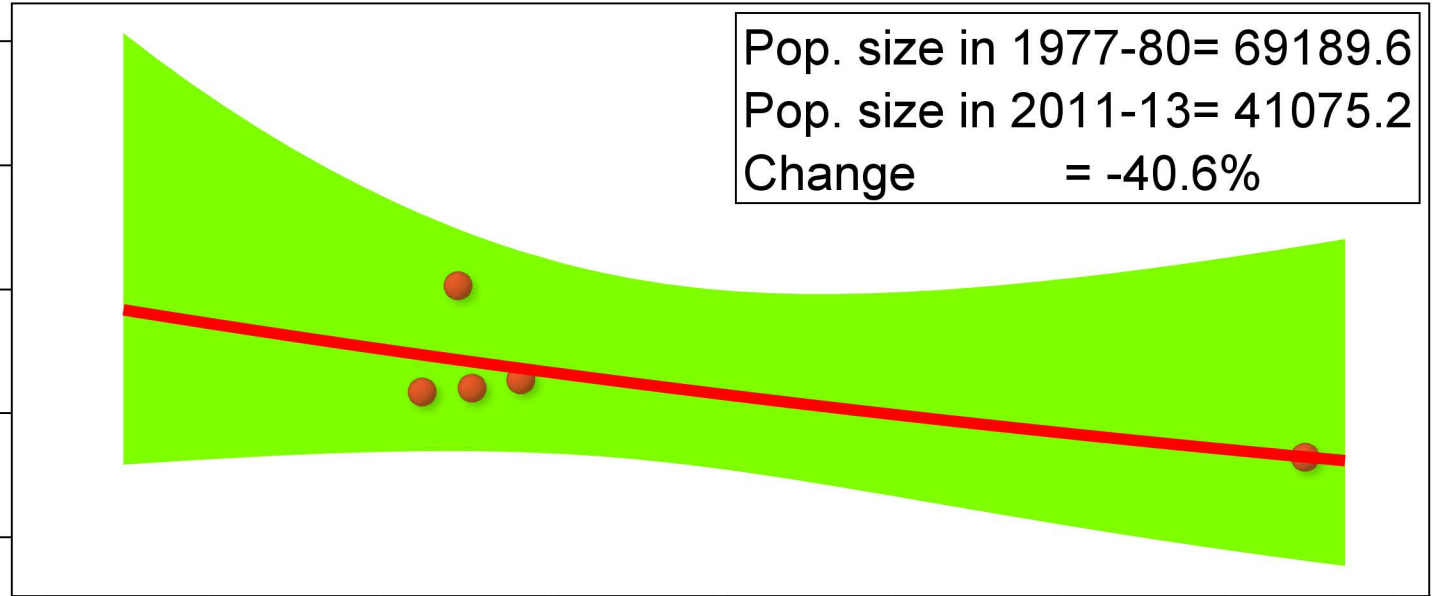

Supplement: S31 (10.1371/journal.pone.0163249.s031) [file journal.pone.0163249.s031]
